# Supplementary material
Source: PubMed Central journal article supplement (PMC3979874)
Supplement: adip-3-107-s01.pdf [file adip-3-107-s01.pdf]

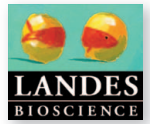

## **Supplemental Material to:**

**Lori A Sturtz, Brenda Deyarmin, Ryan van Laar,  
William Yarina, Craig D Shriver, and Rachel E Ellsworth**

**Gene expression differences in adipose tissue associated  
with breast tumorigenesis**

**Adipocyte 2014; 3(2)**

**<http://dx.doi.org/10.4161/adip.28250>**

**<http://www.landesbioscience.com/journals/adipocyte/article/28250/>**

**Table S1.** Genes differentially expressed between tumor-adjacent and distant adipose from 20 post-menopausal women with invasive breast cancer. Expression level differences were validated for those genes in bold.

| <b>P value</b>   | <b>ProbeSet</b>    | <b>Fold change</b> | <b>Symbol</b>   | <b>Name</b>                                                                                   | <b>EntrezID</b> |
|------------------|--------------------|--------------------|-----------------|-----------------------------------------------------------------------------------------------|-----------------|
| <b>0.0003356</b> | <b>209875_s_at</b> | <b>3.93</b>        | <b>SPP1</b>     | <b>Secreted phosphoprotein 1</b>                                                              | <b>6696</b>     |
| <b>2.24E-05</b>  | <b>201890_at</b>   | <b>3.4</b>         | <b>RRM2</b>     | <b>Ribonucleotidereductase M2</b>                                                             | <b>6241</b>     |
| <b>0.0047765</b> | <b>203936_s_at</b> | <b>3.33</b>        | <b>MMP9</b>     | <b>Matrix metalloproteinase 9 (gelatinase B, 92kda gelatinase, 92kda type IV collagenase)</b> | <b>4318</b>     |
| <b>0.0006941</b> | <b>206214_at</b>   | <b>3.01</b>        | <b>PLA2G7</b>   | <b>Phospholipase A2, group VII (platelet-activating factor acetylhydrolase, plasma)</b>       | <b>7941</b>     |
| <b>0.0001974</b> | <b>209396_s_at</b> | <b>2.97</b>        | <b>CHI3L1</b>   | <b>Chitinase 3-like 1 (cartilage glycoprotein-39)</b>                                         | <b>1116</b>     |
| <b>0.0025852</b> | <b>204259_at</b>   | <b>2.64</b>        | <b>MMP7</b>     | <b>Matrix metalloproteinase 7 (matrilysin, uterine)</b>                                       | <b>4316</b>     |
| 0.0039884        | 201422_at          | 2.56               | IFI30           | Interferon, gamma-inducible protein 30                                                        | 10437           |
| 2.89E-05         | 218039_at          | 2.45               | NUSAP1          | Nucleolar and spindle associated protein 1                                                    | 51203           |
| 0.002203         | 221210_s_at        | 2.41               | NPL             | N-acetylneuraminase pyruvate lyase (dihydrodipicolinate synthase)                             | 80896           |
| 0.0019906        | 219386_s_at        | 2.36               | SLAMF8          | SLAM family member 8                                                                          | 56833           |
| 0.003259         | 204638_at          | 2.33               | ACP5            | Acid phosphatase 5, tartrate resistant                                                        | 54              |
| 0.0009249        | 203240_at          | 2.24               | FCGBP           | Fc fragment of igg binding protein                                                            | 8857            |
| 0.0082057        | 217552_x_at        | 2.09               | CR1             | Complement component (3b/4b) receptor 1 (Knops blood group)                                   | 1378            |
| 0.0011661        | 209606_at          | 2.06               | CYTIP           | Cytohesin 1 interacting protein                                                               | 9595            |
| 0.009725         | 205569_at          | 2.06               | LAMP3           | Lysosomal-associated membrane protein 3                                                       | 27074           |
| 0.0028785        | 207165_at          | 2.05               | HMMR            | Hyaluronan-mediated motility receptor (RHAMM)                                                 | 3161            |
| 0.003867         | 214770_at          | 2.02               | MSR1            | Macrophage scavenger receptor 1                                                               | 4481            |
| 0.0053602        | 219799_s_at        | 2.02               | DHRS9           | Dehydrogenase/reductase (SDR family) member 9                                                 | 10170           |
| 0.00374          | 204787_at          | 2.01               | VSIG4           | V-set and immunoglobulin domain containing 4                                                  | 11326           |
| <b>0.0030656</b> | <b>206134_at</b>   | <b>2</b>           | <b>ADAMDEC1</b> | <b>ADAM-like, decysin 1</b>                                                                   | <b>27299</b>    |
| 0.0017403        | 215049_x_at        | 1.94               | CD163           | CD163 molecule                                                                                | 9332            |
| 0.0052236        | 219505_at          | 1.94               | CECR1           | Cat eye syndrome chromosome region, candidate 1                                               | 51816           |
| 0.0027468        | 202503_s_at        | 1.93               | KIAA0101        | Kiaa0101                                                                                      | 9768            |
| 0.0036383        | 207540_s_at        | 1.93               | SYK             | Spleen tyrosine kinase                                                                        | 6850            |
| 9.64E-05         | 202589_at          | 1.89               | TYMS            | Thymidylatesynthetase                                                                         | 7298            |
| 0.0029199        | 220330_s_at        | 1.88               | SAMSN1          | SAM domain, SH3 domain and nuclear localization signals 1                                     | 64092           |
| 0.0016751        | 219344_at          | 1.87               | SLC29A3         | Solute carrier family 29 (nucleoside transporters), member 3                                  | 55315           |
| 0.0002895        | 204825_at          | 1.86               | MELK            | Maternal embryonic leucine zipper kinase                                                      | 9833            |
| 0.0019932        | 208079_s_at        | 1.86               | AURKA           | Aurora kinase A                                                                               | 6790            |
| 0.0025394        | 201292_at          | 1.86               | TOP2A           | Topoisomerase (DNA) II alpha 170kda                                                           | 7153            |
| 0.0012023        | 203148_s_at        | 1.85               | TRIM14          | Tripartite motif-containing 14                                                                | 9830            |
| 0.0026574        | 209734_at          | 1.84               | NCKAP1L         | NCK-associated protein 1-like                                                                 | 3071            |
| 0.0046402        | 203760_s_at        | 1.84               | SLA             | Src-like-adaptor                                                                              | 6503            |
| 0.009694         | 204588_s_at        | 1.83               | SLC7A7          | Solute carrier family 7 (cationic amino acid transporter, y+ system), member 7                | 9056            |
| 0.0013364        | 204137_at          | 1.82               | GPR137B         | G protein-coupled receptor 137B                                                               | 7107            |
| 0.0036007        | 204337_at          | 1.82               | RGS4            | Regulator of G-protein signaling 4                                                            | 5999            |

| <b>P value</b> | <b>ProbeSet</b> | <b>Fold change</b> | <b>Symbol</b> | <b>Name</b>                                                  | <b>EntrezID</b> |
|----------------|-----------------|--------------------|---------------|--------------------------------------------------------------|-----------------|
| 0.0015251      | 213869_x_at     | 1.81               | THY1          | Thy-1 cell surface antigen                                   | 7070            |
| 0.0077075      | 203416_at       | 1.81               | CD53          | CD53 molecule                                                | 963             |
| 0.0015914      | 204146_at       | 1.8                | RAD51AP1      | RAD51 associated protein 1                                   | 10635           |
| 0.0048473      | 201721_s_at     | 1.8                | LAPTM5        | Lysosomal protein transmembrane 5                            | 7805            |
| 0.0057977      | 216834_at       | 1.79               | RGS1          | Regulator of G-protein signaling 1                           | 5996            |
| 0.009431       | 206715_at       | 1.78               | TFEC          | Transcription factor EC                                      | 22797           |
| 0.0017595      | 212488_at       | 1.77               | COL5A1        | Collagen, type V, alpha 1                                    | 1289            |
| 0.0066839      | 214511_x_at     | 1.77               | FCGR1B        | Fc fragment of igg, high affinity lb, receptor (CD64)        | 2210            |
| 0.0025883      | 202954_at       | 1.76               | UBE2C         | Ubiquitin-conjugating enzyme E2C                             | 11065           |
| 0.0053765      | 214467_at       | 1.75               | GPR65         | G protein-coupled receptor 65                                | 8477            |
| 0.0054807      | 202391_at       | 1.74               | BASP1         | Brain abundant, membrane attached signal protein 1           | 10409           |
| 0.0043167      | 213125_at       | 1.73               | OLFML2B       | Olfactomedin-like 2B                                         | 25903           |
| 0.0053887      | 203471_s_at     | 1.73               | PLEK          | Pleckstrin                                                   | 5341            |
| 0.0001677      | 205105_at       | 1.72               | MAN2A1        | Mannosidase, alpha, class 2A, member 1                       | 4124            |
| 0.0024154      | 216250_s_at     | 1.72               | LPXN          | Leupaxin                                                     | 9404            |
| 0.0040031      | 204982_at       | 1.69               | GIT2          | G protein-coupled receptor kinase interacting arfgap 2       | 9815            |
| 0.0058881      | 210059_s_at     | 1.69               | MAPK13        | Mitogen-activated protein kinase 13                          | 5603            |
| 0.0072444      | 205479_s_at     | 1.69               | PLAU          | Plasminogen activator, urokinase                             | 5328            |
| 4.16E-05       | 203358_s_at     | 1.68               | EZH2          | Enhancer of zeste homolog 2 (Drosophila)                     | 2146            |
| 0.0037548      | 213135_at       | 1.66               | TIAM1         | T-cell lymphoma invasion and metastasis 1                    | 7074            |
| 0.0044157      | 214085_x_at     | 1.66               | GLIPR1        | GLI pathogenesis-related 1                                   | 11010           |
| 0.0068644      | 219403_s_at     | 1.66               | HPSE          | Heparanase                                                   | 10855           |
| 0.0074941      | 205098_at       | 1.66               | CCR1          | Chemokine (C-C motif) receptor 1                             | 1230            |
| 0.0077472      | 208146_s_at     | 1.66               | CPVL          | Carboxypeptidase, vitellogenic-like                          | 54504           |
| 0.0006037      | 209627_s_at     | 1.65               | OSBPL3        | Oxysterol binding protein-like 3                             | 26031           |
| 0.008156       | 204774_at       | 1.65               | EVI2A         | Ecotropic viral integration site 2A                          | 2123            |
| 0.0012253      | 218009_s_at     | 1.64               | PRC1          | Protein regulator of cytokinesis 1                           | 9055            |
| 0.0035824      | 205504_at       | 1.63               | BTK           | Brutonagammaglobulinemia tyrosine kinase                     | 695             |
| 0.0077447      | 203052_at       | 1.63               | C2            | Complement component 2                                       | 717             |
| 0.0082134      | 203473_at       | 1.63               | SLCO2B1       | Solute carrier organic anion transporter family, member 2B1  | 11309           |
| 0.0011952      | 203755_at       | 1.61               | BUB1B         | Budding uninhibited by benzimidazoles 1 homolog beta (yeast) | 701             |
| 0.0041828      | 204912_at       | 1.61               | IL10RA        | Interleukin 10 receptor, alpha                               | 3587            |
| 0.0045576      | 205666_at       | 1.6                | FMO1          | Flavin containing monooxygenase 1                            | 2326            |
| 0.0051567      | 203554_x_at     | 1.59               | PTTG1         | Pituitary tumor-transforming 1                               | 9232            |
| 0.0086067      | 221521_s_at     | 1.59               | GINS2         | GINS complex subunit 2 (Psf2 homolog)                        | 51659           |
| 0.0080088      | 221731_x_at     | 1.58               | VCAN          | Versican                                                     | 1462            |
| 0.0008528      | 204026_s_at     | 1.57               | ZWINT         | ZW10 interactor                                              | 11130           |
| 0.0004001      | 202207_at       | 1.56               | ARL4C         | ADP-ribosylation factor-like 4C                              | 10123           |
| 0.0023225      | 208195_at       | 1.56               | TTN           | Titin                                                        | 7273            |

| <b>P value</b> | <b>ProbeSet</b> | <b>Fold change</b> | <b>Symbol</b> | <b>Name</b>                                                                                   | <b>EntrezID</b> |
|----------------|-----------------|--------------------|---------------|-----------------------------------------------------------------------------------------------|-----------------|
| 0.0050495      | 212658_at       | 1.56               | LHFPL2        | Lipoma HMGIC fusion partner-like 2                                                            | 10184           |
| 0.0055473      | 209360_s_at     | 1.56               | RUNX1         | Runt-related transcription factor 1                                                           | 861             |
| 0.0069799      | 217984_at       | 1.55               | RNASET2       | Ribonuclease T2                                                                               | 8635            |
| 0.0075925      | 208885_at       | 1.55               | LCP1          | Lymphocyte cytosolic protein 1 (L-plastin)                                                    | 3936            |
| 0.0071944      | 204923_at       | 1.54               | SASH3         | SAM and SH3 domain containing 3                                                               | 54440           |
| 0.0087396      | 204170_s_at     | 1.54               | CKS2          | CDC28 protein kinase regulatory subunit 2                                                     | 1164            |
| 0.0067119      | 202838_at       | 1.53               | FUCA1         | Fucosidase, alpha-L- 1, tissue                                                                | 2517            |
| 0.007859       | 213888_s_at     | 1.53               | TRAF3IP3      | TRAF3 interacting protein 3                                                                   | 80342           |
| 0.0003089      | 221802_s_at     | 1.52               | KIAA1598      | Kiaa1598                                                                                      | 57698           |
| 0.0003683      | 219033_at       | 1.52               | PARP8         | Poly (ADP-ribose) polymerase family, member 8                                                 | 79668           |
| 0.0012659      | 209380_s_at     | 1.52               | ABCC5         | ATP-binding cassette, sub-family C (CFTR/MRP), member 5                                       | 10057           |
| 0.0022784      | 201818_at       | 1.52               | LPCAT1        | Lysophosphatidylcholineacyltransferase 1                                                      | 79888           |
| 0.0033638      | 218627_at       | 1.52               | DRAM1         | DNA-damage regulated autophagy modulator 1                                                    | 55332           |
| 0.0046727      | 207075_at       | 1.52               | NLRP3         | NLR family, pyrin domain containing 3                                                         | 114548          |
| 0.0047778      | 209408_at       | 1.52               | KIF2C         | Kinesin family member 2C                                                                      | 11004           |
| 0.0086424      | 207565_s_at     | 1.52               | MR1           | Major histocompatibility complex, class I-related                                             | 3140            |
| 0.0029198      | 213418_at       | 1.51               | HSPA6         | Heat shock 70kda protein 6 (HSP70B')                                                          | 3310            |
| 0.0037236      | 217771_at       | 1.51               | GOLM1         | Golgi membrane protein 1                                                                      | 51280           |
| 0.0038918      | 201563_at       | 1.51               | SORD          | Sorbitol dehydrogenase                                                                        | 6652            |
| 0.005342       | 212810_s_at     | 1.51               | SLC1A4        | Solute carrier family 1 (glutamate/neutral amino acid transporter), member 4                  | 6509            |
| 0.0008395      | 219631_at       | 1.5                | LRP12         | Low density lipoprotein receptor-related protein 12                                           | 29967           |
| 0.0060581      | 212314_at       | 1.5                | SEL1L3        | Sel-1 suppressor of lin-12-like 3 (C. Elegans)                                                | 23231           |
| 0.0073122      | 206638_at       | 1.5                | HTR2B         | 5-hydroxytryptamine (serotonin) receptor 2B                                                   | 3357            |
| 0.0089049      | 219032_x_at     | 1.5                | OPN3          | Opsin 3                                                                                       | 23596           |
| 0.0090037      | 207571_x_at     | 1.5                | C1orf38       | Chromosome 1 open reading frame 38                                                            | 9473            |
| 0.0018087      | 207828_s_at     | 1.49               | CENPF         | Centromere protein F, 350/400kda (mitosin)                                                    | 1063            |
| 0.0005606      | 204861_s_at     | 1.48               | NAIP          | NLR family, apoptosis inhibitory protein                                                      | 4671            |
| 0.0046906      | 202628_s_at     | 1.48               | SERPINE1      | Serpin peptidase inhibitor, clade E (nexin, plasminogen activator inhibitor type 1), member 1 | 5054            |
| 0.0060288      | 219735_s_at     | 1.48               | TFCP2L1       | Transcription factor CP2-like 1                                                               | 29842           |
| 0.0086554      | 203213_at       | 1.48               | CDK1          | Cyclin-dependent kinase 1                                                                     | 983             |
| 0.0096176      | 219358_s_at     | 1.48               | ADAP2         | Arfgap with dual PH domains 2                                                                 | 55803           |
| 0.0052655      | 219105_x_at     | 1.47               | ORC6L         | Origin recognition complex, subunit 6 like (yeast)                                            | 23594           |
| 0.0059786      | 205988_at       | 1.47               | CD84          | CD84 molecule                                                                                 | 8832            |
| 0.0014417      | 206028_s_at     | 1.46               | MERTK         | C-mer proto-oncogene tyrosine kinase                                                          | 10461           |
| 0.0017444      | 214806_at       | 1.46               | BICD1         | Bicaudal D homolog 1 (Drosophila)                                                             | 636             |
| 0.0023701      | 209693_at       | 1.46               | ASTN2         | Astrotactin 2                                                                                 | 23245           |
| 0.0045869      | 203185_at       | 1.46               | RASSF2        | Ras association (ralgds/AF-6) domain family member 2                                          | 9770            |
| 0.0078033      | 212820_at       | 1.46               | DMXL2         | Dmx-like 2                                                                                    | 23312           |
| 0.0008997      | 202869_at       | 1.45               | OAS1          | 2',5'-oligoadenylate synthetase 1, 40/46kda                                                   | 4938            |

| <b>P value</b> | <b>ProbeSet</b> | <b>Fold change</b> | <b>Symbol</b> | <b>Name</b>                                                                       | <b>EntrezID</b> |
|----------------|-----------------|--------------------|---------------|-----------------------------------------------------------------------------------|-----------------|
| 0.0029346      | 209267_s_at     | 1.45               | SLC39A8       | Solute carrier family 39 (zinc transporter), member 8                             | 64116           |
| 0.00569        | 204527_at       | 1.45               | MYO5A         | Myosin VA (heavy chain 12, myosin)                                                | 4644            |
| 0.0068839      | 200708_at       | 1.45               | GOT2          | Glutamic-oxaloacetic transaminase 2, mitochondrial (aspartate aminotransferase 2) | 2806            |
| 0.0018196      | 202087_s_at     | 1.44               | CTSL1         | Cathepsin L1                                                                      | 1514            |
| 0.0028339      | 203530_s_at     | 1.44               | STX4          | Syntaxin 4                                                                        | 6810            |
| 0.0033591      | 214697_s_at     | 1.44               | ROD1          | ROD1 regulator of differentiation 1 (S. Pombe)                                    | 9991            |
| 0.008842       | 222039_at       | 1.44               | KIF18B        | Kinesin family member 18B                                                         | 146909          |
| 0.0097392      | 202888_s_at     | 1.44               | ANPEP         | Alanyl (membrane) aminopeptidase                                                  | 290             |
| 0.0011624      | 212481_s_at     | 1.43               | TPM4          | Tropomyosin 4                                                                     | 7171            |
| 0.002494       | 218443_s_at     | 1.43               | DAZAP1        | DAZ associated protein 1                                                          | 26528           |
| 0.0058446      | 206687_s_at     | 1.43               | PTPN6         | Protein tyrosine phosphatase, non-receptor type 6                                 | 5777            |
| 0.0070059      | 218543_s_at     | 1.42               | PARP12        | Poly (ADP-ribose) polymerase family, member 12                                    | 64761           |
| 0.007597       | 204033_at       | 1.42               | TRIP13        | Thyroid hormone receptor interactor 13                                            | 9319            |
| 0.0044509      | 218257_s_at     | 1.41               | UGGT1         | UDP-glucose glycoprotein glucosyltransferase 1                                    | 56886           |
| 0.0053565      | 219210_s_at     | 1.41               | RAB8B         | RAB8B, member RAS oncogene family                                                 | 51762           |
| 0.0061665      | 219806_s_at     | 1.41               | C11orf75      | Chromosome 11 open reading frame 75                                               | 56935           |
| 0.0016516      | 203744_at       | 1.4                | HMGB3         | High-mobility group box 3                                                         | 3149            |
| 0.0033126      | 206060_s_at     | 1.4                | PTPN22        | Protein tyrosine phosphatase, non-receptor type 22 (lymphoid)                     | 26191           |
| 0.0061097      | 203879_at       | 1.4                | PIK3CD        | Phosphoinositide-3-kinase, catalytic, delta polypeptide                           | 5293            |
| 0.0062097      | 201847_at       | 1.4                | LIPA          | Lipase A, lysosomal acid, cholesterol esterase                                    | 3988            |
| 0.0069465      | 221734_at       | 1.4                | PRRC1         | Proline-rich coiled-coil 1                                                        | 133619          |
| 0.0019759      | 213428_s_at     | 1.39               | COL6A1        | Collagen, type VI, alpha 1                                                        | 1291            |
| 0.0064075      | 201576_s_at     | 1.39               | GLB1          | Galactosidase, beta 1                                                             | 2720            |
| 0.0074102      | 210809_s_at     | 1.39               | POSTN         | Periostin, osteoblast specific factor                                             | 10631           |
| 0.0006619      | 217947_at       | 1.38               | CMTM6         | CKLF-like MARVEL transmembrane domain containing 6                                | 54918           |
| 0.0017961      | 202329_at       | 1.38               | CSK           | C-src tyrosine kinase                                                             | 1445            |
| 0.0028848      | 201883_s_at     | 1.37               | B4GALT1       | UDP-Gal:betaglucnac beta 1,4- galactosyltransferase, polypeptide 1                | 2683            |
| 0.0039191      | 202404_s_at     | 1.37               | COL1A2        | Collagen, type I, alpha 2                                                         | 1278            |
| 0.0062403      | 211719_x_at     | 1.37               | FN1           | Fibronectin 1                                                                     | 2335            |
| 0.0098333      | 210074_at       | 1.37               | CTSL2         | Cathepsin L2                                                                      | 1515            |
| 0.0020082      | 214453_s_at     | 1.36               | IFI44         | Interferon-induced protein 44                                                     | 10561           |
| 0.003898       | 210125_s_at     | 1.36               | BANF1         | Barrier to autointegration factor 1                                               | 8815            |
| 0.0063312      | 205024_s_at     | 1.36               | RAD51         | RAD51 homolog (reca homolog, E. Coli) (S. Cerevisiae)                             | 5888            |
| 0.0069814      | 213007_at       | 1.36               | FANCI         | Fanconi anemia, complementation group I                                           | 55215           |
| 0.008555       | 208248_x_at     | 1.36               | APLP2         | Amyloid beta (A4) precursor-like protein 2                                        | 334             |
| 0.003228       | 221538_s_at     | 1.35               | PLXNA1        | Plexin A1                                                                         | 5361            |
| 0.0095224      | 219734_at       | 1.35               | SIDT1         | SID1 transmembrane family, member 1                                               | 54847           |
| 0.0022433      | 202397_at       | 1.34               | NUTF2         | Nuclear transport factor 2                                                        | 10204           |
| 0.0025634      | 203585_at       | 1.34               | ZNF185        | Zinc finger protein 185 (LIM domain)                                              | 7739            |

| <b>P value</b> | <b>ProbeSet</b> | <b>Fold change</b> | <b>Symbol</b> | <b>Name</b>                                                                                       | <b>EntrezID</b> |
|----------------|-----------------|--------------------|---------------|---------------------------------------------------------------------------------------------------|-----------------|
| 0.0036957      | 204417_at       | 1.34               | GALC          | Galactosylceramidase                                                                              | 2581            |
| 0.004958       | 209545_s_at     | 1.34               | RIPK2         | Receptor-interacting serine-threonine kinase 2                                                    | 8767            |
| 0.0052422      | 220242_x_at     | 1.34               | ZNF701        | Zinc finger protein 701                                                                           | 55762           |
| 0.0031561      | 213797_at       | 1.33               | RSAD2         | Radical S-adenosyl methionine domain containing 2                                                 | 91543           |
| 0.0037867      | 217764_s_at     | 1.33               | RAB31         | RAB31, member RAS oncogene family                                                                 | 11031           |
| 0.0039831      | 205685_at       | 1.33               | CD86          | CD86 molecule                                                                                     | 942             |
| 0.0043737      | 212281_s_at     | 1.33               | TMEM97        | Transmembrane protein 97                                                                          | 27346           |
| 0.0072245      | 212021_s_at     | 1.33               | MKI67         | Antigen identified by monoclonal antibody Ki-67                                                   | 4288            |
| 0.0081089      | 202086_at       | 1.33               | MX1           | Myxovirus (influenza virus) resistance 1, interferon-inducible protein p78 (mouse)                | 4599            |
| 5.62E-05       | 212321_at       | 1.32               | SGPL1         | Sphingosine-1-phosphate lyase 1                                                                   | 8879            |
| 0.0009792      | 204728_s_at     | 1.32               | WDHD1         | WD repeat and HMG-box DNA binding protein 1                                                       | 11169           |
| 0.0012094      | 211963_s_at     | 1.32               | ARPC5         | Actin related protein 2/3 complex, subunit 5, 16kda                                               | 10092           |
| 0.0055039      | 212829_at       | 1.32               | PIP4K2A       | Phosphatidylinositol-5-phosphate 4-kinase, type II, alpha                                         | 5305            |
| 0.0090241      | 202188_at       | 1.32               | NUP93         | Nucleoporin 93kda                                                                                 | 9688            |
| 0.0095982      | 217838_s_at     | 1.32               | EVL           | Enah/Vasp-like                                                                                    | 51466           |
| 0.0021678      | 217995_at       | 1.31               | SQRDL         | Sulfide quinoreductase-like (yeast)                                                               | 58472           |
| 0.0042538      | 218781_at       | 1.31               | SMC6          | Structural maintenance of chromosomes 6                                                           | 79677           |
| 0.0048086      | 201278_at       | 1.31               | DAB2          | Disabled homolog 2, mitogen-responsive phosphoprotein (Drosophila)                                | 1601            |
| 0.0052592      | 203878_s_at     | 1.31               | MMP11         | Matrix metalloproteinase 11 (stromelysin 3)                                                       | 4320            |
| 0.0070483      | 221957_at       | 1.31               | PKD3          | Pyruvate dehydrogenase kinase, isozyme 3                                                          | 5165            |
| 0.008931       | 219148_at       | 1.31               | PBK           | PDZ binding kinase                                                                                | 55872           |
| 0.0091833      | 213618_at       | 1.31               | ARAP2         | Arfgap with rhogap domain, ankyrin repeat and PH domain 2                                         | 116984          |
| 0.0005992      | 206182_at       | 1.3                | ZNF134        | Zinc finger protein 134                                                                           | 7693            |
| 0.0006699      | 200989_at       | 1.3                | HIF1A         | Hypoxia inducible factor 1, alpha subunit (basic helix-loop-helix transcription factor)           | 3091            |
| 0.0017515      | 217749_at       | 1.3                | COPG          | Coatmer protein complex, subunit gamma                                                            | 22820           |
| 0.0048176      | 211048_s_at     | 1.3                | PDIA4         | Protein disulfide isomerase family A, member 4                                                    | 9601            |
| 0.0059483      | 218400_at       | 1.3                | OAS3          | 2'-5'-oligoadenylate synthetase 3, 100kda                                                         | 4940            |
| 0.0064025      | 204674_at       | 1.3                | LRMP          | Lymphoid-restricted membrane protein                                                              | 4033            |
| 0.0064302      | 204444_at       | 1.3                | KIF11         | Kinesin family member 11                                                                          | 3832            |
| 0.0005574      | 212539_at       | 1.29               | CHD1L         | Chromodomain helicase DNA binding protein 1-like                                                  | 9557            |
| 0.0006721      | 213720_s_at     | 1.29               | SMARCA4       | SWI/SNF related, matrix associated, actin dependent regulator of chromatin, subfamily a, member 4 | 6597            |
| 0.0011121      | 219565_at       | 1.29               | CYP20A1       | Cytochrome P450, family 20, subfamily A, polypeptide 1                                            | 57404           |
| 0.0025466      | 208913_at       | 1.29               | GGA2          | Golgi-associated, gamma adaptin ear containing, ARF binding protein 2                             | 23062           |
| 0.0041427      | 209444_at       | 1.29               | RAP1GDS1      | RAP1, GTP-GDP dissociation stimulator 1                                                           | 5910            |
| 0.0041623      | 202580_x_at     | 1.29               | FOXM1         | Forkhead box M1                                                                                   | 2305            |
| 0.0076891      | 212791_at       | 1.29               | C1orf216      | Chromosome 1 open reading frame 216                                                               | 127703          |
| 0.0096237      | 205997_at       | 1.29               | ADAM28        | ADAM metalloproteinase domain 28                                                                  | 10863           |
| 0.0011904      | 201786_s_at     | 1.28               | ADAR          | Adenosine deaminase, RNA-specific                                                                 | 103             |

| <b>P value</b> | <b>ProbeSet</b> | <b>Fold change</b> | <b>Symbol</b> | <b>Name</b>                                                       | <b>EntrezID</b> |
|----------------|-----------------|--------------------|---------------|-------------------------------------------------------------------|-----------------|
| 0.0013472      | 206483_at       | 1.28               | LRR6          | Leucine rich repeat containing 6                                  | 23639           |
| 0.002745       | 208117_s_at     | 1.28               | LAS1L         | LAS1-like (S. Cerevisiae)                                         | 81887           |
| 0.0052002      | 200615_s_at     | 1.28               | AP2B1         | Adaptor-related protein complex 2, beta 1 subunit                 | 163             |
| 0.0028077      | 200697_at       | 1.27               | HK1           | Hexokinase 1                                                      | 3098            |
| 0.0030282      | 201967_at       | 1.27               | RBM6          | RNA binding motif protein 6                                       | 10180           |
| 0.0048307      | 206118_at       | 1.27               | STAT4         | Signal transducer and activator of transcription 4                | 6775            |
| 0.0051376      | 215076_s_at     | 1.27               | COL3A1        | Collagen, type III, alpha 1                                       | 1281            |
| 0.0066147      | 204994_at       | 1.27               | MX2           | Myxovirus (influenza virus) resistance 2 (mouse)                  | 4600            |
| 0.0083489      | 210947_s_at     | 1.27               | MSH3          | Muts homolog 3 (E. Coli)                                          | 4437            |
| 0.0091269      | 200616_s_at     | 1.27               | MLEC          | Malectin                                                          | 9761            |
| 0.0003806      | 218157_x_at     | 1.26               | CDC42SE1      | CDC42 small effector 1                                            | 56882           |
| 0.0004938      | 203974_at       | 1.26               | HDHD1         | Haloacid dehalogenase-like hydrolase domain containing 1          | 8226            |
| 0.0009124      | 204226_at       | 1.26               | STAU2         | Staufen, RNA binding protein, homolog 2 (Drosophila)              | 27067           |
| 0.0021223      | 202854_at       | 1.26               | HPRT1         | Hypoxanthine phosphoribosyltransferase 1                          | 3251            |
| 0.0062063      | 202382_s_at     | 1.26               | GNPDA1        | Glucosamine-6-phosphate deaminase 1                               | 10007           |
| 0.0071882      | 209683_at       | 1.26               | FAM49A        | Family with sequence similarity 49, member A                      | 81553           |
| 0.0088209      | 200975_at       | 1.26               | PPT1          | Palmitoyl-protein thioesterase 1                                  | 5538            |
| 0.0097531      | 219863_at       | 1.26               | HERC5         | Hect domain and RLD 5                                             | 51191           |
| 0.0002413      | 218374_s_at     | 1.25               | C12orf4       | Chromosome 12 open reading frame 4                                | 57102           |
| 0.0009292      | 218229_s_at     | 1.25               | POGK          | Pogo transposable element with KRAB domain                        | 57645           |
| 0.0019194      | 221073_s_at     | 1.25               | NOD1          | Nucleotide-binding oligomerization domain containing 1            | 10392           |
| 0.0036223      | 202369_s_at     | 1.25               | TRAM2         | Translocation associated membrane protein 2                       | 9697            |
| 0.0044991      | 212288_at       | 1.25               | FNBP1         | Formin binding protein 1                                          | 23048           |
| 0.0070469      | 221892_at       | 1.25               | H6PD          | Hexose-6-phosphate dehydrogenase (glucose 1-dehydrogenase)        | 9563            |
| 0.0081624      | 218248_at       | 1.25               | FAM111A       | Family with sequence similarity 111, member A                     | 63901           |
| 0.0090315      | 203721_s_at     | 1.25               | UTP18         | UTP18, small subunit (SSU) processome component, homolog (yeast)  | 51096           |
| 0.0097056      | 203298_s_at     | 1.25               | JARID2        | Jumonji, AT rich interactive domain 2                             | 3720            |
| 0.0013499      | 212899_at       | 1.24               | CDK19         | Cyclin-dependent kinase 19                                        | 23097           |
| 0.0028508      | 205588_s_at     | 1.24               | FGFR1OP       | FGFR1 oncogene partner                                            | 11116           |
| 0.0034608      | 208829_at       | 1.24               | TAPBP         | TAP binding protein (tapasin)                                     | 6892            |
| 0.0038561      | 217750_s_at     | 1.24               | UBE2Z         | Ubiquitin-conjugating enzyme E2Z                                  | 65264           |
| 0.0051484      | 202361_at       | 1.24               | SEC24C        | SEC24 family, member C (S. Cerevisiae)                            | 9632            |
| 0.0083759      | 203127_s_at     | 1.24               | SPTLC2        | Serine palmitoyltransferase, long chain base subunit 2            | 9517            |
| 0.0085075      | 46323_at        | 1.24               | CANT1         | Calcium activated nucleotidase 1                                  | 124583          |
| 0.0098824      | 202510_s_at     | 1.24               | TNFAIP2       | Tumor necrosis factor, alpha-induced protein 2                    | 7127            |
| 0.0011604      | 218979_at       | 1.23               | RMI1          | RMI1, recq mediated genome instability 1, homolog (S. Cerevisiae) | 80010           |
| 0.0034124      | 218867_s_at     | 1.23               | C12orf49      | Chromosome 12 open reading frame 49                               | 79794           |
| 0.0036638      | 202128_at       | 1.23               | KIAA0317      | Kiaa0317                                                          | 9870            |

| <b>P value</b> | <b>ProbeSet</b> | <b>Fold change</b> | <b>Symbol</b> | <b>Name</b>                                                               | <b>EntrezID</b> |
|----------------|-----------------|--------------------|---------------|---------------------------------------------------------------------------|-----------------|
| 0.0057978      | 202804_at       | 1.23               | ABCC1         | ATP-binding cassette, sub-family C (CFTR/MRP), member 1                   | 4363            |
| 0.0061632      | 219661_at       | 1.23               | RANBP17       | RAN binding protein 17                                                    | 64901           |
| 0.009322       | 203567_s_at     | 1.23               | TRIM38        | Tripartite motif-containing 38                                            | 10475           |
| 0.0096289      | 213238_at       | 1.23               | ATP10D        | Atpase, class V, type 10D                                                 | 57205           |
| 0.0097206      | 200999_s_at     | 1.23               | CKAP4         | Cytoskeleton-associated protein 4                                         | 10970           |
| 0.0009744      | 222231_s_at     | 1.22               | LRRCS9        | Leucine rich repeat containing 59                                         | 55379           |
| 0.0023267      | 202642_s_at     | 1.22               | TRRAP         | Transformation/transcription domain-associated protein                    | 8295            |
| 0.0026747      | 203284_s_at     | 1.22               | HS2ST1        | Heparan sulfate 2-O-sulfotransferase 1                                    | 9653            |
| 0.0031642      | 219384_s_at     | 1.22               | ADAT1         | Adenosine deaminase, trna-specific 1                                      | 23536           |
| 0.0031689      | 207719_x_at     | 1.22               | CEP170        | Centrosomal protein 170kda                                                | 9859            |
| 0.0053298      | 204140_at       | 1.22               | TPST1         | Tyrosylproteinsulfotransferase 1                                          | 8460            |
| 0.0062534      | 220155_s_at     | 1.22               | BRD9          | Bromodomain containing 9                                                  | 65980           |
| 0.0094602      | 209450_at       | 1.22               | OSGEP         | O-sialoglycoproteinendopeptidase                                          | 55644           |
| 0.0051938      | 200619_at       | 1.21               | SF3B2         | Splicing factor 3b, subunit 2, 145kda                                     | 10992           |
| 0.0060917      | 203037_s_at     | 1.21               | MTSS1         | Metastasis suppressor 1                                                   | 9788            |
| 0.0073379      | 201410_at       | 1.21               | PLEKH2        | Pleckstrin homology domain containing, family B (evectins) member 2       | 55041           |
| 0.0002655      | 203327_at       | 1.2                | IDE           | Insulin-degrading enzyme                                                  | 3416            |
| 0.0030417      | 201376_s_at     | 1.2                | HNRNPF        | Heterogeneous nuclear ribonucleoprotein F                                 | 3185            |
| 0.0035564      | 203376_at       | 1.2                | CDC40         | Cell division cycle 40 homolog (S. Cerevisiae)                            | 51362           |
| 0.0046203      | 205745_x_at     | 1.2                | ADAM17        | ADAM metallopeptidase domain 17                                           | 6868            |
| 0.0085534      | 218140_x_at     | 1.2                | SRPRB         | Signal recognition particle receptor, B subunit                           | 58477           |
| 0.00995        | 209953_s_at     | 1.2                | CDC37         | Cell division cycle 37 homolog (S. Cerevisiae)                            | 11140           |
| 0.001635       | 219002_at       | 1.19               | FASTKD1       | FAST kinase domains 1                                                     | 79675           |
| 0.0020407      | 208959_s_at     | 1.19               | ERP44         | Endoplasmic reticulum protein 44                                          | 23071           |
| 0.0025952      | 209770_at       | 1.19               | BTN3A1        | Butyrophilin, subfamily 3, member A1                                      | 11119           |
| 0.0042323      | 201664_at       | 1.19               | SMC4          | Structural maintenance of chromosomes 4                                   | 10051           |
| 0.0042902      | 211724_x_at     | 1.19               | MIOS          | Missing oocyte, meiosis regulator, homolog (Drosophila)                   | 54468           |
| 0.0094351      | 220577_at       | 1.19               | GVIN1         | Gtpase, very large interferon inducible 1                                 | 387751          |
| 0.0006787      | 202713_s_at     | 1.18               | KIAA0391      | Kiaa0391                                                                  | 9692            |
| 0.0009462      | 208644_at       | 1.18               | PARP1         | Poly (ADP-ribose) polymerase 1                                            | 142             |
| 0.0015119      | 202093_s_at     | 1.18               | PAF1          | Paf1, RNA polymerase II associated factor, homolog (S. Cerevisiae)        | 54623           |
| 0.0018603      | 217928_s_at     | 1.18               | PPP6R3        | Protein phosphatase 6, regulatory subunit 3                               | 55291           |
| 0.0036302      | 213101_s_at     | 1.18               | ACTR3         | ARP3 actin-related protein 3 homolog (yeast)                              | 10096           |
| 0.0078717      | 213449_at       | 1.18               | POP1          | Processing of precursor 1, ribonuclease P/MRP subunit (S. Cerevisiae)     | 10940           |
| 0.0080747      | 212269_s_at     | 1.18               | MCM3AP        | Minichromosome maintenance complex component 3 associated protein         | 8888            |
| 0.0047895      | 201331_s_at     | 1.17               | STAT6         | Signal transducer and activator of transcription 6, interleukin-4 induced | 6778            |
| 0.0048764      | 202406_s_at     | 1.17               | TIAL1         | TIA1 cytotoxic granule-associated RNA binding protein-like 1              | 7073            |
| 0.0025061      | 203612_at       | 1.16               | BYSL          | Bystin-like                                                               | 705             |



| <b>P value</b> | <b>ProbeSet</b> | <b>Fold change</b> | <b>Symbol</b> | <b>Name</b>                                                                                            | <b>EntrezID</b> |
|----------------|-----------------|--------------------|---------------|--------------------------------------------------------------------------------------------------------|-----------------|
| 0.006099       | 213115_at       | 1.16               | ATG4A         | ATG4 autophagy related 4 homolog A (S. Cerevisiae)                                                     | 115201          |
| 0.0091732      | 204202_at       | 1.16               | IQCE          | IQ motif containing E                                                                                  | 23288           |
| 0.0093119      | 218652_s_at     | 1.16               | PIGG          | Phosphatidylinositol glycan anchor biosynthesis, class G                                               | 54872           |
| 0.0020306      | 219394_at       | 1.15               | PGS1          | Phosphatidylglycerophosphate synthase 1                                                                | 9489            |
| 0.0044091      | 202852_s_at     | 1.15               | AAGAB         | Alpha- and gamma-adaptin binding protein                                                               | 79719           |
| 0.0045658      | 201438_at       | 1.15               | COL6A3        | Collagen, type VI, alpha 3                                                                             | 1293            |
| 0.0058449      | 221741_s_at     | 1.15               | YTHDF1        | YTH domain family, member 1                                                                            | 54915           |
| 0.0095827      | 203278_s_at     | 1.15               | PHF21A        | PHD finger protein 21A                                                                                 | 51317           |
| 0.0049341      | 200599_s_at     | 1.14               | HSP90B1       | Heat shock protein 90kda beta (Grp94), member 1                                                        | 7184            |
| 0.0015971      | 208801_at       | 1.13               | SRP72         | Signal recognition particle 72kda                                                                      | 6731            |
| 0.0040154      | 218909_at       | 1.13               | RPS6KC1       | Ribosomal protein S6 kinase, 52kda, polypeptide 1                                                      | 26750           |
| 0.0063999      | 202040_s_at     | 1.13               | KDM5A         | Lysine (K)-specific demethylase 5A                                                                     | 5927            |
| 0.0007296      | 200614_at       | 1.12               | CLTC          | Clathrin, heavy chain (Hc)                                                                             | 1213            |
| 0.0021547      | 201263_at       | 1.12               | TARS          | Threonyl-tRNA synthetase                                                                               | 6897            |
| 0.0077629      | 208642_s_at     | 1.12               | XRCC5         | X-ray repair complementing defective repair in Chinese hamster cells 5 (double-strand-break rejoining) | 7520            |
| 0.0096862      | 204835_at       | 1.12               | POLA1         | Polymerase (DNA directed), alpha 1, catalytic subunit                                                  | 5422            |
| 0.0057401      | 217727_x_at     | 1.1                | VPS35         | Vacuolar protein sorting 35 homolog (S. Cerevisiae)                                                    | 55737           |
| 0.0059825      | 200860_s_at     | 1.1                | CNOT1         | CCR4-NOT transcription complex, subunit 1                                                              | 23019           |
| 0.0065199      | 201371_s_at     | 1.09               | CUL3          | Cullin 3                                                                                               | 8452            |
| 0.002026       | 217963_s_at     | 0.91               | NGFRAP1       | Nerve growth factor receptor (TNFRSF16) associated protein 1                                           | 27018           |
| 0.0059871      | 212144_at       | 0.9                | SUN2          | Sad1 and UNC84 domain containing 2                                                                     | 25777           |
| 0.0079631      | 217731_s_at     | 0.9                | ITM2B         | Integral membrane protein 2B                                                                           | 9445            |
| 0.0031017      | 209001_s_at     | 0.89               | ANAPC13       | Anaphase promoting complex subunit 13                                                                  | 25847           |
| 0.0053812      | 200718_s_at     | 0.89               | SKP1          | S-phase kinase-associated protein 1                                                                    | 6500            |
| 0.0067769      | 200032_s_at     | 0.89               | RPL9          | Ribosomal protein L9                                                                                   | 6133            |
| 0.0012161      | 206158_s_at     | 0.88               | CNBP          | CCHC-type zinc finger, nucleic acid binding protein                                                    | 7555            |
| 0.002223       | 210774_s_at     | 0.88               | NCOA4         | Nuclear receptor coactivator 4                                                                         | 8031            |
| 0.0087019      | 200056_s_at     | 0.88               | C1D           | C1D nuclear receptor corepressor                                                                       | 10438           |
| 0.0009782      | 209075_s_at     | 0.87               | ISCU          | Iron-sulfur cluster scaffold homolog (E. Coli)                                                         | 23479           |
| 0.0045783      | 221613_s_at     | 0.87               | ZFAND6        | Zinc finger, AN1-type domain 6                                                                         | 54469           |
| 0.0047506      | 205236_x_at     | 0.87               | SOD3          | Superoxide dismutase 3, extracellular                                                                  | 6649            |
| 0.007394       | 213218_at       | 0.87               | ZNF187        | Zinc finger protein 187                                                                                | 7741            |
| 0.008164       | 204386_s_at     | 0.87               | MRP63         | Mitochondrial ribosomal protein 63                                                                     | 78988           |
| 0.008596       | 203261_at       | 0.87               | DCTN6         | Dynactin 6                                                                                             | 10671           |
| 0.0022409      | 201836_s_at     | 0.86               | SUPT7L        | Suppressor of Ty 7 (S. Cerevisiae)-like                                                                | 9913            |
| 0.0036292      | 209004_s_at     | 0.86               | FBXL5         | F-box and leucine-rich repeat protein 5                                                                | 26234           |
| 0.0071054      | 213282_at       | 0.86               | APOOL         | Apolipoprotein O-like                                                                                  | 139322          |
| 0.0091986      | 212099_at       | 0.86               | RHOB          | Ras homolog gene family, member B                                                                      | 388             |
| 0.0092002      | 217761_at       | 0.86               | ADI1          | Acireductonedioxygenase 1                                                                              | 55256           |

| <b>P value</b> | <b>ProbeSet</b> | <b>Fold change</b> | <b>Symbol</b> | <b>Name</b>                                                                      | <b>EntrezID</b> |
|----------------|-----------------|--------------------|---------------|----------------------------------------------------------------------------------|-----------------|
| 0.0010155      | 204311_at       | 0.85               | ATP1B2        | Atpase, Na+/K+ transporting, beta 2 polypeptide                                  | 482             |
| 0.0020134      | 202299_s_at     | 0.85               | HBXIP         | Hepatitis B virus x interacting protein                                          | 10542           |
| 0.004156       | 202419_at       | 0.85               | KDSR          | 3-ketodihydrosphingosine reductase                                               | 2531            |
| 0.0042233      | 32091_at        | 0.85               | SLC25A44      | Solute carrier family 25, member 44                                              | 9673            |
| 0.004314       | 202858_at       | 0.85               | U2AF1         | U2 small nuclear RNA auxiliary factor 1                                          | 7307            |
| 0.0051382      | 216321_s_at     | 0.85               | NR3C1         | Nuclear receptor subfamily 3, group C, member 1 (glucocorticoid receptor)        | 2908            |
| 0.0063394      | 218407_x_at     | 0.85               | NENF          | Neuron derived neurotrophic factor                                               | 29937           |
| 0.0066193      | 212097_at       | 0.85               | CAV1          | Caveolin 1, caveolae protein, 22kda                                              | 857             |
| 0.0086291      | 202334_s_at     | 0.85               | UBE2B         | Ubiquitin-conjugating enzyme E2B (RAD6 homolog)                                  | 7320            |
| 0.0095388      | 217845_x_at     | 0.85               | HIGD1A        | HIG1 hypoxia inducible domain family, member 1A                                  | 25994           |
| 0.0015474      | 221775_x_at     | 0.84               | RPL22         | Ribosomal protein L22                                                            | 6146            |
| 0.0030282      | 215096_s_at     | 0.84               | ESD           | Esterase D                                                                       | 2098            |
| 0.0030374      | 204145_at       | 0.84               | FRG1          | FSHD region gene 1                                                               | 2483            |
| 0.0031079      | 206217_at       | 0.84               | EDA           | Ectodysplasin A                                                                  | 1896            |
| 0.0059988      | 219030_at       | 0.84               | TPRKB         | TP53RK binding protein                                                           | 51002           |
| 0.0066993      | 219041_s_at     | 0.84               | REPIN1        | Replication initiator 1                                                          | 29803           |
| 0.0071933      | 204001_at       | 0.84               | SNAPC3        | Small nuclear RNA activating complex, polypeptide 3, 50kda                       | 6619            |
| 0.0073871      | 220487_at       | 0.84               | SNTG2         | Syntrophin, gamma 2                                                              | 54221           |
| 0.0077041      | 201738_at       | 0.84               | EIF1B         | Eukaryotic translation initiation factor 1B                                      | 10289           |
| 0.0089274      | 218289_s_at     | 0.84               | UBA5          | Ubiquitin-like modifier activating enzyme 5                                      | 79876           |
| 0.009168       | 209358_at       | 0.84               | TAF11         | TAF11 RNA polymerase II, TATA box binding protein (TBP)-associated factor, 28kda | 6882            |
| 0.0008667      | 203053_at       | 0.83               | BCAS2         | Breast carcinoma amplified sequence 2                                            | 10286           |
| 0.0013977      | 218204_s_at     | 0.83               | FYCO1         | FYVE and coiled-coil domain containing 1                                         | 79443           |
| 0.0016697      | 202824_s_at     | 0.83               | TCEB1         | Transcription elongation factor B (SIII), polypeptide 1 (15kda, elongin C)       | 6921            |
| 0.002349       | 201317_s_at     | 0.83               | PSMA2         | Proteasome (prosome, macropain) subunit, alpha type, 2                           | 5683            |
| 0.0032197      | 218226_s_at     | 0.83               | NDUFB4        | NADH dehydrogenase (ubiquinone) 1 beta subcomplex, 4, 15kda                      | 4710            |
| 0.0063785      | 218050_at       | 0.83               | UFM1          | Ubiquitin-fold modifier 1                                                        | 51569           |
| 0.0083571      | 218946_at       | 0.83               | NFU1          | NFU1 iron-sulfur cluster scaffold homolog (S. Cerevisiae)                        | 27247           |
| 0.00113        | 213835_x_at     | 0.82               | GTPBP3        | GTP binding protein 3 (mitochondrial)                                            | 84705           |
| 0.0014035      | 201134_x_at     | 0.82               | COX7C         | Cytochrome c oxidase subunit viic                                                | 1350            |
| 0.0015922      | 200091_s_at     | 0.82               | RPS25         | Ribosomal protein S25                                                            | 6230            |
| 0.0022484      | 214263_x_at     | 0.82               | POLR2C        | Polymerase (RNA) II (DNA directed) polypeptide C, 33kda                          | 5432            |
| 0.0022735      | 202069_s_at     | 0.82               | IDH3A         | Isocitrate dehydrogenase 3 (NAD+) alpha                                          | 3419            |
| 0.0041157      | 219446_at       | 0.82               | RIC8B         | Resistance to inhibitors of cholinesterase 8 homolog B (C. Elegans)              | 55188           |
| 0.0055785      | 217773_s_at     | 0.82               | NDUFA4        | NADH dehydrogenase (ubiquinone) 1 alpha subcomplex, 4, 9kda                      | 4697            |
| 0.0056091      | 209120_at       | 0.82               | NR2F2         | Nuclear receptor subfamily 2, group F, member 2                                  | 7026            |
| 0.0059883      | 218101_s_at     | 0.82               | NDUFC2        | NADH dehydrogenase (ubiquinone) 1, subcomplex unknown, 2, 14.5kda                | 4718            |

| <b>P value</b> | <b>ProbeSet</b> | <b>Fold change</b> | <b>Symbol</b> | <b>Name</b>                                                                       | <b>EntrezID</b> |
|----------------|-----------------|--------------------|---------------|-----------------------------------------------------------------------------------|-----------------|
| 0.0075599      | 212440_at       | 0.82               | SNRNP27       | Small nuclear ribonucleoprotein 27kda (U4/U6.U5)                                  | 11017           |
| 0.0002643      | 205849_s_at     | 0.81               | UQCRB         | Ubiquinol-cytochrome c reductase binding protein                                  | 7381            |
| 0.0018362      | 219006_at       | 0.81               | NDUFAF4       | NADH dehydrogenase (ubiquinone) 1 alpha subcomplex, assembly factor 4             | 29078           |
| 0.0025763      | 213206_at       | 0.81               | GOSR2         | Golgi SNAP receptor complex member 2                                              | 9570            |
| 0.0042473      | 203478_at       | 0.81               | NDUFC1        | NADH dehydrogenase (ubiquinone) 1, subcomplex unknown, 1, 6kda                    | 4717            |
| 0.0046251      | 203484_at       | 0.81               | SEC61G        | Sec61 gamma subunit                                                               | 23480           |
| 0.0052688      | 221570_s_at     | 0.81               | METTL5        | Methyltransferase like 5                                                          | 29081           |
| 0.0093059      | 207547_s_at     | 0.81               | FAM107A       | Family with sequence similarity 107, member A                                     | 11170           |
| 0.0003553      | 218085_at       | 0.8                | CHMP5         | Chromatin modifying protein 5                                                     | 51510           |
| 0.0009734      | 207550_at       | 0.8                | MPL           | Myeloproliferative leukemia virus oncogene                                        | 4352            |
| 0.0015173      | 217408_at       | 0.8                | MRPS18B       | Mitochondrial ribosomal protein S18B                                              | 28973           |
| 0.0017552      | 202325_s_at     | 0.8                | ATP5J         | ATP synthase, H+ transporting, mitochondrial Fo complex, subunit F6               | 522             |
| 0.0053731      | 209550_at       | 0.8                | NDN           | Necdin homolog (mouse)                                                            | 4692            |
| 0.0070129      | 210512_s_at     | 0.8                | VEGFA         | Vascular endothelial growth factor A                                              | 7422            |
| 0.0010081      | 202724_s_at     | 0.79               | FOXO1         | Forkhead box O1                                                                   | 2308            |
| 0.0016173      | 203781_at       | 0.79               | MRPL33        | Mitochondrial ribosomal protein L33                                               | 9553            |
| 0.0018793      | 218334_at       | 0.79               | THOC7         | THO complex 7 homolog (Drosophila)                                                | 80145           |
| 0.003681       | 201897_s_at     | 0.79               | CKS1B         | CDC28 protein kinase regulatory subunit 1B                                        | 1163            |
| 0.0067692      | 221596_s_at     | 0.79               | C7orf64       | Chromosome 7 open reading frame 64                                                | 84060           |
| 0.007007       | 206837_at       | 0.79               | ALX1          | ALX homeobox 1                                                                    | 8092            |
| 0.009298       | 200595_s_at     | 0.79               | EIF3A         | Eukaryotic translation initiation factor 3, subunit A                             | 8661            |
| 0.0004607      | 218643_s_at     | 0.78               | CRIP1         | Cysteine-rich PDZ-binding protein                                                 | 9419            |
| 0.0007611      | 209551_at       | 0.78               | YIPF4         | Yip1 domain family, member 4                                                      | 84272           |
| 0.0010045      | 211747_s_at     | 0.78               | LSM5          | LSM5 homolog, U6 small nuclear RNA associated (S. Cerevisiae)                     | 23658           |
| 0.0031695      | 221689_s_at     | 0.78               | PIGP          | Phosphatidylinositol glycan anchor biosynthesis, class P                          | 51227           |
| 0.0038684      | 206554_x_at     | 0.78               | SETMAR        | SET domain and mariner transposase fusion gene                                    | 6419            |
| 0.0066724      | 208158_s_at     | 0.78               | OSBPL1A       | Oxysterol binding protein-like 1A                                                 | 114876          |
| 0.0071751      | 206995_x_at     | 0.78               | SCARF1        | Scavenger receptor class F, member 1                                              | 8578            |
| 0.0075174      | 204442_x_at     | 0.78               | LTBP4         | Latent transforming growth factor beta binding protein 4                          | 8425            |
| 0.0089959      | 215088_s_at     | 0.78               | SDHC          | Succinate dehydrogenase complex, subunit C, integral membrane protein, 15kda      | 6391            |
| 0.001689       | 209303_at       | 0.77               | NDUFS4        | NADH dehydrogenase (ubiquinone) Fe-S protein 4, 18kda (NADH-coenzyme Q reductase) | 4724            |
| 0.0053028      | 204363_at       | 0.77               | F3            | Coagulation factor III (thromboplastin, tissue factor)                            | 2152            |
| 0.0080026      | 203169_at       | 0.77               | RGP1          | RGP1 retrograde golgi transport homolog (S. Cerevisiae)                           | 9827            |
| 0.0081238      | 205231_s_at     | 0.77               | EPM2A         | Epilepsy, progressive myoclonus type 2A, Lafora disease (laforin)                 | 7957            |
| 0.0019111      | 219291_at       | 0.76               | DTWD1         | DTW domain containing 1                                                           | 56986           |
| 0.0085842      | 212719_at       | 0.76               | PHLPP1        | PH domain and leucine rich repeat protein phosphatase 1                           | 23239           |
| 0.0028527      | 213221_s_at     | 0.75               | SIK2          | Salt-inducible kinase 2                                                           | 23235           |

| <b>P value</b> | <b>ProbeSet</b> | <b>Fold change</b> | <b>Symbol</b> | <b>Name</b>                                                              | <b>EntrezID</b> |
|----------------|-----------------|--------------------|---------------|--------------------------------------------------------------------------|-----------------|
| 0.0037233      | 212914_at       | 0.75               | CBX7          | Chromobox homolog 7                                                      | 23492           |
| 0.0001346      | 203735_x_at     | 0.74               | PPFIBP1       | PTPRF interacting protein, binding protein 1 (liprin beta 1)             | 8496            |
| 0.0018997      | 201829_at       | 0.74               | NET1          | Neuroepithelial cell transforming 1                                      | 10276           |
| 0.001246       | 207738_s_at     | 0.73               | NCKAP1        | NCK-associated protein 1                                                 | 10787           |
| 0.0049882      | 213844_at       | 0.73               | HOXA5         | Homeobox A5                                                              | 3202            |
| 0.0086085      | 219371_s_at     | 0.73               | KLF2          | Kruppel-like factor 2 (lung)                                             | 10365           |
| 0.0007168      | 205036_at       | 0.72               | LSM6          | LSM6 homolog, U6 small nuclear RNA associated (S. Cerevisiae)            | 11157           |
| 0.0003705      | 219979_s_at     | 0.71               | C11orf73      | Chromosome 11 open reading frame 73                                      | 51501           |
| 0.001831       | 206262_at       | 0.69               | ADH1C         | Alcohol dehydrogenase 1C (class I), gamma polypeptide                    | 126             |
| 0.0019937      | 204075_s_at     | 0.69               | KIAA0562      | Kiaa0562                                                                 | 9731            |
| 0.0035308      | 205421_at       | 0.66               | SLC22A3       | Solute carrier family 22 (extraneuronal monoamine transporter), member 3 | 6581            |

**Table S2.** Genes differentially expressed between tumor-adjacent adipose and adipose from non-malignant breasts. Expression level differences were validated for those genes in bold.

| <b>P value</b>   | <b>ProbeSet</b>    | <b>Fold change</b> | <b>Symbol</b> | <b>Name</b>                                                                            | <b>EntrezID</b> |
|------------------|--------------------|--------------------|---------------|----------------------------------------------------------------------------------------|-----------------|
| 7.30E-06         | 205819_at          | 6.33               | MARCO         | Macrophage receptor with collagenous structure                                         | 8685            |
| 1.00E-07         | 204787_at          | 5.72               | VSIG4         | V-set and immunoglobulin domain containing 4                                           | 11326           |
| 3.00E-07         | 202953_at          | 5.32               | C1QB          | Complement component 1, q subcomponent, B chain                                        | 713             |
| 1.60E-06         | 218232_at          | 4.77               | C1QA          | Complement component 1, q subcomponent, A chain                                        | 712             |
| 1.99E-05         | 217552_x_at        | 4.77               | CR1           | Complement component (3b/4b) receptor 1 (Knops blood group)                            | 1378            |
| < 1e-07          | 215049_x_at        | 4.71               | CD163         | CD163 molecule                                                                         | 9332            |
| < 1e-07          | 204829_s_at        | 4.49               | FOLR2         | Folate receptor 2 (fetal)                                                              | 2350            |
| 1.63E-05         | 201422_at          | 4.38               | IFI30         | Interferon, gamma-inducible protein 30                                                 | 10437           |
| 0.0001088        | 219799_s_at        | 4.04               | DHRS9         | Dehydrogenase/reductase (SDR family) member 9                                          | 10170           |
| 2.80E-06         | 203665_at          | 3.94               | HMOX1         | Hemeoxygenase (decycling) 1                                                            | 3162            |
| 7.00E-07         | 201743_at          | 3.82               | CD14          | CD14 molecule                                                                          | 929             |
| 7.00E-07         | 219607_s_at        | 3.77               | MS4A4A        | Membrane-spanning 4-domains, subfamily A, member 4                                     | 51338           |
| 1.70E-06         | 201785_at          | 3.76               | RNASE1        | Ribonuclease, rnase A family, 1 (pancreatic)                                           | 6035            |
| 5.00E-07         | 203473_at          | 3.75               | SLCO2B1       | Solute carrier organic anion transporter family, member 2B1                            | 11309           |
| 2.90E-06         | 204122_at          | 3.65               | TYROBP        | TYRO protein tyrosine kinase binding protein                                           | 7305            |
| 8.00E-07         | 209906_at          | 3.59               | C3AR1         | Complement component 3a receptor 1                                                     | 719             |
| <b>0.0004022</b> | <b>34210_at</b>    | <b>3.56</b>        | <b>CD52</b>   | <b>CD52 molecule</b>                                                                   | <b>1043</b>     |
| 4.20E-06         | 214770_at          | 3.55               | MSR1          | Macrophage scavenger receptor 1                                                        | 4481            |
| 9.50E-05         | 206682_at          | 3.54               | CLEC10A       | C-type lectin domain family 10, member A                                               | 10462           |
| < 1e-07          | 207075_at          | 3.47               | NLRP3         | NLR family, pyrin domain containing 3                                                  | 114548          |
| 2.00E-07         | 203760_s_at        | 3.47               | SLA           | Src-like-adaptor                                                                       | 6503            |
| 0.0030059        | 203936_s_at        | 3.43               | MMP9          | Matrix metalloproteinase 9 (gelatinase B, 92kda gelatinase, 92kda type IV collagenase) | 4318            |
| <b>0.0046384</b> | <b>219454_at</b>   | <b>3.41</b>        | <b>EGFL6</b>  | <b>EGF-like-domain, multiple 6</b>                                                     | <b>25975</b>    |
| 8.90E-06         | 207277_at          | 3.4                | CD209         | CD209 molecule                                                                         | 30835           |
| 9.00E-07         | 203561_at          | 3.35               | FCGR2A        | Fc fragment of igg, low affinity iia, receptor (CD32)                                  | 2212            |
| 1.50E-06         | 201212_at          | 3.29               | LGMN          | Legumain                                                                               | 5641            |
| <b>3.69E-05</b>  | <b>215051_x_at</b> | <b>3.29</b>        | <b>AIF1</b>   | <b>Allograft inflammatory factor 1</b>                                                 | <b>199</b>      |
| 3.60E-06         | 200678_x_at        | 3.25               | GRN           | Granulin                                                                               | 2896            |
| <b>0.0001015</b> | <b>202803_s_at</b> | <b>3.2</b>         | <b>ITGB2</b>  | <b>Integrin, beta 2 (complement component 3 receptor 3 and 4 subunit)</b>              | <b>3689</b>     |
| 1.99E-05         | 221210_s_at        | 3.16               | NPL           | N-acetylneuraminate pyruvate lyase (dihydrodipicolinate synthase)                      | 80896           |
| <b>0.0003872</b> | <b>32128_at</b>    | <b>3.11</b>        | <b>CCL18</b>  | <b>Chemokine (C-C motif) ligand 18 (pulmonary and activation-regulated)</b>            | <b>6362</b>     |

| P value          | ProbeSet           | Fold change | Symbol      | Name                                                                             | EntrezID     |
|------------------|--------------------|-------------|-------------|----------------------------------------------------------------------------------|--------------|
| 0.0002279        | 206214_at          | 3.07        | PLA2G7      | Phospholipase A2, group VII (platelet-activating factor acetylhydrolase, plasma) | 7941         |
| 2.00E-07         | 205488_at          | 3.05        | GZMA        | Granzyme A (granzyme 1, cytotoxic T-lymphocyte-associated serine esterase 3)     | 3001         |
| 1.23E-05         | 210889_s_at        | 3.03        | FCGR2B      | Fc fragment of igg, low affinity iib, receptor (CD32)                            | 2213         |
| 3.30E-05         | 201721_s_at        | 3.03        | LAPTM5      | Lysosomal protein transmembrane 5                                                | 7805         |
| <b>0.0033799</b> | <b>207621_s_at</b> | <b>3.03</b> | <b>PEMT</b> | <b>Phosphatidylethanolamine N-methyltransferase</b>                              | <b>10400</b> |
| 1.37E-05         | 205098_at          | 3.01        | CCR1        | Chemokine (C-C motif) receptor 1                                                 | 1230         |
| 4.00E-06         | 38487_at           | 2.97        | STAB1       | Stabilin 1                                                                       | 23166        |
| 7.20E-06         | 207540_s_at        | 2.94        | SYK         | Spleen tyrosine kinase                                                           | 6850         |
| 5.40E-06         | 209734_at          | 2.87        | NCKAP1L     | NCK-associated protein 1-like                                                    | 3071         |
| 2.00E-07         | 202957_at          | 2.86        | HCLS1       | Hematopoietic cell-specific Lyn substrate 1                                      | 3059         |
| 0.000911         | 204638_at          | 2.86        | ACP5        | Acid phosphatase 5, tartrate resistant                                           | 54           |
| 9.75E-05         | 219386_s_at        | 2.84        | SLAMF8      | SLAM family member 8                                                             | 56833        |
| 2.59E-05         | 202902_s_at        | 2.82        | CTSS        | Cathepsin 5                                                                      | 1520         |
| 1.00E-06         | 204912_at          | 2.79        | IL10RA      | Interleukin 10 receptor, alpha                                                   | 3587         |
| 7.50E-06         | 219358_s_at        | 2.78        | ADAP2       | Arfgap with dual PH domains 2                                                    | 55803        |
| 5.39E-05         | 204158_s_at        | 2.78        | TCIRG1      | T-cell, immune regulator 1, atpase, H+ transporting, lysosomal V0 subunit A3     | 10312        |
| 1.00E-07         | 207571_x_at        | 2.77        | C1orf38     | Chromosome 1 open reading frame 38                                               | 9473         |
| 9.64E-05         | 204232_at          | 2.77        | FCER1G      | Fc fragment of ige, high affinity 1, receptor for; gamma polypeptide             | 2207         |
| 2.30E-05         | 205786_s_at        | 2.73        | ITGAM       | Integrin, alpha M (complement component 3 receptor 3 subunit)                    | 3684         |
| 0.0056346        | 209875_s_at        | 2.73        | SPP1        | Secreted phosphoprotein 1                                                        | 6696         |
| 8.10E-06         | 203416_at          | 2.69        | CD53        | CD53 molecule                                                                    | 963          |
| 0.0001717        | 203886_s_at        | 2.68        | FBLN2       | Fibulin 2                                                                        | 2199         |
| 0.0001383        | 209933_s_at        | 2.65        | CD300A      | CD300a molecule                                                                  | 11314        |
| 0.0005857        | 203915_at          | 2.64        | CXCL9       | Chemokine (C-X-C motif) ligand 9                                                 | 4283         |
| <b>0.0035533</b> | <b>201890_at</b>   | <b>2.63</b> | <b>RRM2</b> | <b>Ribonucleotidoreductase M2</b>                                                | <b>6241</b>  |
| 5.70E-06         | 203104_at          | 2.57        | CSF1R       | Colony stimulating factor 1 receptor                                             | 1436         |
| 1.30E-06         | 209685_s_at        | 2.56        | PRKCB       | Protein kinase C, beta                                                           | 5579         |
| 1.70E-05         | 213418_at          | 2.53        | HSPA6       | Heat shock 70kda protein 6 (HSP70B')                                             | 3310         |
| 0.0001709        | 204588_s_at        | 2.53        | SLC7A7      | Solute carrier family 7 (cationic amino acid transporter, y+ system), member 7   | 9056         |
| 0.0006259        | 219025_at          | 2.53        | CD248       | CD248 molecule, endosialin                                                       | 57124        |
| 8.00E-07         | 206545_at          | 2.5         | CD28        | CD28 molecule                                                                    | 940          |
| 7.20E-06         | 203923_s_at        | 2.49        | CYBB        | Cytochrome b-245, beta polypeptide                                               | 1536         |
| 0.0002624        | 205349_at          | 2.48        | GNA15       | Guanine nucleotide binding protein (G protein), alpha 15 (Gq class)              | 2769         |
| 1.02E-05         | 210644_s_at        | 2.47        | LAIR1       | Leukocyte-associated immunoglobulin-like receptor 1                              | 3903         |

| <b>P value</b> | <b>ProbeSet</b> | <b>Fold change</b> | <b>Symbol</b> | <b>Name</b>                                                                           | <b>EntrezID</b> |
|----------------|-----------------|--------------------|---------------|---------------------------------------------------------------------------------------|-----------------|
| 2.20E-06       | 44673_at        | 2.45               | SIGLEC1       | Sialic acid binding Ig-like lectin 1, sialoadhesin                                    | 6614            |
| 3.80E-06       | 206219_s_at     | 2.45               | VAV1          | Vav 1 guanine nucleotide exchange factor                                              | 7409            |
| 3.23E-05       | 203471_s_at     | 2.45               | PLEK          | Pleckstrin                                                                            | 5341            |
| 0.0005516      | 205419_at       | 2.43               | GPR183        | G protein-coupled receptor 183                                                        | 1880            |
| 0.000567       | 206407_s_at     | 2.43               | CCL13         | Chemokine (C-C motif) ligand 13                                                       | 6357            |
| 4.29E-05       | 209417_s_at     | 2.4                | IFI35         | Interferon-induced protein 35                                                         | 3430            |
| 0.0003318      | 206666_at       | 2.4                | GZMK          | Granzyme K (granzyme 3; tryptase II)                                                  | 3003            |
| 0.0016344      | 205653_at       | 2.4                | CTSG          | Cathepsin G                                                                           | 1511            |
| 0.0037695      | 205922_at       | 2.38               | VNN2          | Vanin 2                                                                               | 8875            |
| 0.0045292      | 212488_at       | 2.38               | COL5A1        | Collagen, type V, alpha 1                                                             | 1289            |
| 0.0001493      | 209606_at       | 2.37               | CYTIP         | Cytohesin 1 interacting protein                                                       | 9595            |
| 0.0001641      | 220088_at       | 2.36               | C5AR1         | Complement component 5a receptor 1                                                    | 728             |
| 1.04E-05       | 202880_s_at     | 2.34               | CYTH1         | Cytohesin 1                                                                           | 9267            |
| 2.61E-05       | 204774_at       | 2.34               | EVI2A         | Ecotropic viral integration site 2A                                                   | 2123            |
| 7.04E-05       | 219282_s_at     | 2.34               | TRPV2         | Transient receptor potential cation channel, subfamily V, member 2                    | 51393           |
| 5.99E-05       | 219666_at       | 2.33               | MS4A6A        | Membrane-spanning 4-domains, subfamily A, member 6A                                   | 64231           |
| 6.50E-06       | 205988_at       | 2.32               | CD84          | CD84 molecule                                                                         | 8832            |
| 2.77E-05       | 206715_at       | 2.32               | TFEC          | Transcription factor EC                                                               | 22797           |
| 0.0047596      | 221666_s_at     | 2.32               | PYCARD        | PYD and CARD domain containing                                                        | 29108           |
| 1.89E-05       | 205128_x_at     | 2.31               | PTGS1         | Prostaglandin-endoperoxide synthase 1 (prostaglandin G/H synthase and cyclooxygenase) | 5742            |
| 0.0011351      | 200736_s_at     | 2.31               | GPX1          | Glutathione peroxidase 1                                                              | 2876            |
| 0.000164       | 206726_at       | 2.29               | HPGDS         | Hematopoietic prostaglandin D synthase                                                | 27306           |
| 0.0003482      | 211748_x_at     | 2.29               | PTGDS         | Prostaglandin D2 synthase 21kda (brain)                                               | 5730            |
| 0.0011044      | 204446_s_at     | 2.29               | ALOX5         | Arachidonate 5-lipoxygenase                                                           | 240             |
| 7.24E-05       | 208146_s_at     | 2.28               | CPVL          | Carboxypeptidase, vitellogenic-like                                                   | 54504           |
| 0.0001034      | 209949_at       | 2.28               | NCF2          | Neutrophil cytosolic factor 2                                                         | 4688            |
| 4.96E-05       | 219952_s_at     | 2.27               | MCOLN1        | Mucolipin 1                                                                           | 57192           |
| 0.004423       | 203028_s_at     | 2.27               | CYBA          | Cytochrome b-245, alpha polypeptide                                                   | 1535            |
| 0.0095467      | 200852_x_at     | 2.27               | GNB2          | Guanine nucleotide binding protein (G protein), beta polypeptide 2                    | 2783            |
| 3.80E-06       | 217362_x_at     | 2.26               | HLA-DRB6      | Major histocompatibility complex, class II, DR beta 6 (pseudogene)                    | 3128            |
| 0.0002933      | 208961_s_at     | 2.26               | KLF6          | Kruppel-like factor 6                                                                 | 1316            |
| 0.0075654      | 213553_x_at     | 2.26               | APOC1         | Apolipoprotein C-I                                                                    | 341             |
| 3.40E-05       | 205504_at       | 2.25               | BTK           | Brutonagammaglobulinemia tyrosine kinase                                              | 695             |
| 0.0012052      | 219059_s_at     | 2.25               | LYVE1         | Lymphatic vessel endothelial hyaluronan receptor 1                                    | 10894           |
| 0.0068727      | 213869_x_at     | 2.25               | THY1          | Thy-1 cell surface antigen                                                            | 7070            |
| 3.80E-06       | 213160_at       | 2.23               | DOCK2         | Dedicator of cytokinesis 2                                                            | 1794            |

| <b>P value</b> | <b>ProbeSet</b> | <b>Fold change</b> | <b>Symbol</b> | <b>Name</b>                                                                       | <b>EntrezID</b> |
|----------------|-----------------|--------------------|---------------|-----------------------------------------------------------------------------------|-----------------|
| 8.10E-05       | 218831_s_at     | 2.23               | FCGRT         | Fc fragment of igg, receptor, transporter, alpha                                  | 2217            |
| 0.0086297      | 201953_at       | 2.23               | CIB1          | Calcium and integrin binding 1 (calmyrin)                                         | 10519           |
| 0.0044968      | 203535_at       | 2.22               | S100A9        | S100 calcium binding protein A9                                                   | 6280            |
| 0.0004422      | 202180_s_at     | 2.21               | MVP           | Major vault protein                                                               | 9961            |
| 0.0039992      | 204103_at       | 2.21               | CCL4          | Chemokine (C-C motif) ligand 4                                                    | 6351            |
| 2.05E-05       | 56821_at        | 2.2                | SLC38A7       | Solute carrier family 38, member 7                                                | 55238           |
| 0.0005066      | 219344_at       | 2.18               | SLC29A3       | Solute carrier family 29 (nucleoside transporters), member 3                      | 55315           |
| 1.90E-06       | 204057_at       | 2.16               | IRF8          | Interferon regulatory factor 8                                                    | 3394            |
| 7.71E-05       | 208306_x_at     | 2.16               | HLA-DRB4      | Major histocompatibility complex, class II, DR beta 4                             | 3126            |
| 0.0001294      | 204655_at       | 2.16               | CCL5          | Chemokine (C-C motif) ligand 5                                                    | 6352            |
| 0.0001845      | 221269_s_at     | 2.16               | SH3BGR3       | SH3 domain binding glutamic acid-rich protein like 3                              | 83442           |
| 0.0009411      | 201809_s_at     | 2.16               | ENG           | Endoglin                                                                          | 2022            |
| 0.0018647      | 206420_at       | 2.16               | IGSF6         | Immunoglobulin superfamily, member 6                                              | 10261           |
| 4.50E-06       | 203508_at       | 2.15               | TNFRSF1B      | Tumor necrosis factor receptor superfamily, member 1B                             | 7133            |
| 2.19E-05       | 203052_at       | 2.15               | C2            | Complement component 2                                                            | 717             |
| 0.000141       | 202910_s_at     | 2.15               | CD97          | CD97 molecule                                                                     | 976             |
| 0.0006601      | 213566_at       | 2.13               | RNASE6        | Ribonuclease, rnase A family, k6                                                  | 6039            |
| 0.0004916      | 218384_at       | 2.12               | CARHSP1       | Calcium regulated heat stable protein 1, 24kda                                    | 23589           |
| 0.0009527      | 202947_s_at     | 2.11               | GYPC          | Glycophorin C (Gerbich blood group)                                               | 2995            |
| 0.0048472      | 204647_at       | 2.11               | HOMER3        | Homer homolog 3 (Drosophila)                                                      | 9454            |
| 0.0002187      | 208894_at       | 2.1                | HLA-DRA       | Major histocompatibility complex, class II, DR alpha                              | 3122            |
| 1.61E-05       | 212873_at       | 2.09               | HMHA1         | Histocompatibility (minor) HA-1                                                   | 23526           |
| 0.0022541      | 213905_x_at     | 2.08               | BGN           | Biglycan                                                                          | 633             |
| 9.87E-05       | 207677_s_at     | 2.07               | NCF4          | Neutrophil cytosolic factor 4, 40kda                                              | 4689            |
| 0.0004485      | 218567_x_at     | 2.07               | DPP3          | Dipeptidyl-peptidase 3                                                            | 10072           |
| 2.04E-05       | 205269_at       | 2.06               | LCP2          | Lymphocyte cytosolic protein 2 (SH2 domain containing leukocyte protein of 76kda) | 3937            |
| 0.0002118      | 201360_at       | 2.06               | CST3          | Cystatin C                                                                        | 1471            |
| 0.0002331      | 200837_at       | 2.06               | BCAP31        | B-cell receptor-associated protein 31                                             | 10134           |
| 0.0004962      | 200827_at       | 2.06               | PLOD1         | Procollagen-lysine 1, 2-oxoglutarate 5-dioxygenase 1                              | 5351            |
| 0.0004422      | 220330_s_at     | 2.05               | SAMSN1        | SAM domain, SH3 domain and nuclear localization signals 1                         | 64092           |
| 0.000427       | 213125_at       | 2.04               | OLFML2B       | Olfactomedin-like 2B                                                              | 25903           |
| 0.0007612      | 200634_at       | 2.04               | PFN1          | Profilin 1                                                                        | 5216            |
| 0.0027715      | 203305_at       | 2.04               | F13A1         | Coagulation factor XIII, A1 polypeptide                                           | 2162            |
| 0.0030644      | 201393_s_at     | 2.04               | IGF2R         | Insulin-like growth factor 2 receptor                                             | 3482            |
| 0.0065288      | 206100_at       | 2.04               | CPM           | Carboxypeptidase M                                                                | 1368            |
| 0.0081883      | 202075_s_at     | 2.04               | PLTP          | Phospholipid transfer protein                                                     | 5360            |
| 0.0026086      | 200710_at       | 2.03               | ACADVL        | Acyl-coa dehydrogenase, very long chain                                           | 37              |



| <b>P value</b> | <b>ProbeSet</b> | <b>Fold change</b> | <b>Symbol</b> | <b>Name</b>                                                                 | <b>EntrezID</b> |
|----------------|-----------------|--------------------|---------------|-----------------------------------------------------------------------------|-----------------|
| 0.0091489      | 207509_s_at     | 2.03               | LAIR2         | Leukocyte-associated immunoglobulin-like receptor 2                         | 3904            |
| 0.0001886      | 201954_at       | 2.02               | ARPC1B        | Actin related protein 2/3 complex, subunit 1B, 41kda                        | 10095           |
| 0.0010615      | 218272_at       | 2.02               | TTC38         | Tetratricopeptide repeat domain 38                                          | 55020           |
| 0.0013236      | 218231_at       | 2.02               | NAGK          | N-acetylglucosamine kinase                                                  | 55577           |
| 0.0013558      | 221698_s_at     | 2.02               | CLEC7A        | C-type lectin domain family 7, member A                                     | 64581           |
| 0.0015027      | 218843_at       | 2.02               | FNDC4         | Fibronectin type III domain containing 4                                    | 64838           |
| 1.50E-06       | 201487_at       | 2.01               | CTSC          | Cathepsin C                                                                 | 1075            |
| 0.0003003      | 211395_x_at     | 2.01               | FCGR2C        | Fc fragment of igg, low affinity iic, receptor for (CD32) (gene/pseudogene) | 9103            |
| 0.0001531      | 219183_s_at     | 2                  | CYTH4         | Cytohesin 4                                                                 | 27128           |
| 3.27E-05       | 200661_at       | 1.99               | CTSA          | Cathepsin A                                                                 | 5476            |
| 7.49E-05       | 217925_s_at     | 1.99               | C6orf106      | Chromosome 6 open reading frame 106                                         | 64771           |
| 0.0002822      | 210075_at       | 1.99               | MARCH2        | Membrane-associated ring finger (C3HC4) 2                                   | 51257           |
| 0.0032943      | 205119_s_at     | 1.98               | FPR1          | Formyl peptide receptor 1                                                   | 2357            |
| 0.000114       | 201818_at       | 1.97               | LPCAT1        | Lysophosphatidylcholineacyltransferase 1                                    | 79888           |
| 0.0002264      | 214574_x_at     | 1.97               | LST1          | Leukocyte specific transcript 1                                             | 7940            |
| 3.78E-05       | 206278_at       | 1.96               | PTAFR         | Platelet-activating factor receptor                                         | 5724            |
| 0.0006106      | 219452_at       | 1.96               | DPEP2         | Dipeptidase 2                                                               | 64174           |
| 0.0028791      | 203234_at       | 1.96               | UPP1          | Uridinephosphorylase 1                                                      | 7378            |
| 0.0001616      | 210176_at       | 1.95               | TLR1          | Toll-like receptor 1                                                        | 7096            |
| 0.0008187      | 34206_at        | 1.95               | ARAP1         | Arfgap with rhogap domain, ankyrin repeat and PH domain 1                   | 116985          |
| 0.0014946      | 202391_at       | 1.95               | BASP1         | Brain abundant, membrane attached signal protein 1                          | 10409           |
| 0.0001526      | 214617_at       | 1.94               | PRF1          | Perforin 1 (pore forming protein)                                           | 5551            |
| 0.0003238      | 211742_s_at     | 1.94               | EVI2B         | Ecotropic viral integration site 2B                                         | 2124            |
| 0.0006894      | 217118_s_at     | 1.94               | C22orf9       | Chromosome 22 open reading frame 9                                          | 23313           |
| 0.0009258      | 218130_at       | 1.94               | C17orf62      | Chromosome 17 open reading frame 62                                         | 79415           |
| 0.0047173      | 205792_at       | 1.94               | WISP2         | WNT1 inducible signaling pathway protein 2                                  | 8839            |
| 0.0013642      | 206134_at       | 1.93               | ADAMDEC1      | ADAM-like, decysin 1                                                        | 27299           |
| 0.0046684      | 202975_s_at     | 1.93               | RHOBTB3       | Rho-related BTB domain containing 3                                         | 22836           |
| 0.0059497      | 205483_s_at     | 1.93               | ISG15         | ISG15 ubiquitin-like modifier                                               | 9636            |
| 0.006076       | 214297_at       | 1.93               | CSPG4         | Chondroitin sulfate proteoglycan 4                                          | 1464            |
| 0.0071393      | 202659_at       | 1.93               | PSMB10        | Proteasome (prosome, macropain) subunit, beta type, 10                      | 5699            |
| 3.53E-05       | 204923_at       | 1.92               | SASH3         | SAM and SH3 domain containing 3                                             | 54440           |
| 0.0002767      | 219403_s_at     | 1.91               | HPSE          | Heparanase                                                                  | 10855           |
| 0.0035717      | 203507_at       | 1.91               | CD68          | CD68 molecule                                                               | 968             |
| 6.41E-05       | 208625_s_at     | 1.9                | EIF4G1        | Eukaryotic translation initiation factor 4 gamma, 1                         | 1981            |
| 0.0002126      | 202944_at       | 1.9                | NAGA          | N-acetylgalactosaminidase, alpha-                                           | 4668            |
| 0.0010586      | 204007_at       | 1.9                | FCGR3B        | Fc fragment of igg, low affinity iiib, receptor (CD16b)                     | 2215            |

| <b>P value</b> | <b>ProbeSet</b> | <b>Fold change</b> | <b>Symbol</b> | <b>Name</b>                                                                             | <b>EntrezID</b> |
|----------------|-----------------|--------------------|---------------|-----------------------------------------------------------------------------------------|-----------------|
| 0.007631       | 201050_at       | 1.9                | PLD3          | Phospholipase D family, member 3                                                        | 23646           |
| 7.23E-05       | 200839_s_at     | 1.89               | CTSB          | Cathepsin B                                                                             | 1508            |
| 0.0001333      | 208885_at       | 1.89               | LCP1          | Lymphocyte cytosolic protein 1 (L-plastin)                                              | 3936            |
| 0.001304       | 204220_at       | 1.89               | GMFG          | Glia maturation factor, gamma                                                           | 9535            |
| 0.0041702      | 210029_at       | 1.89               | IDO1          | Indoleamine 2,3-dioxygenase 1                                                           | 3620            |
| 7.11E-05       | 205685_at       | 1.88               | CD86          | CD86 molecule                                                                           | 942             |
| 0.0009744      | 213539_at       | 1.88               | CD3D          | CD3d molecule, delta (CD3-TCR complex)                                                  | 915             |
| 4.76E-05       | 204663_at       | 1.87               | ME3           | Malic enzyme 3, NADP(+)-dependent, mitochondrial                                        | 10873           |
| 0.000498       | 210659_at       | 1.87               | CMKLR1        | Chemokine-like receptor 1                                                               | 1240            |
| 0.0009058      | 210042_s_at     | 1.87               | CTSZ          | Cathepsin Z                                                                             | 1522            |
| 0.0032066      | 205012_s_at     | 1.87               | HAGH          | Hydroxyacylglutathione hydrolase                                                        | 3029            |
| 4.62E-05       | 214054_at       | 1.86               | DOK2          | Docking protein 2, 56kda                                                                | 9046            |
| 4.92E-05       | 202838_at       | 1.86               | FUCA1         | Fucosidase, alpha-L- 1, tissue                                                          | 2517            |
| 6.73E-05       | 212588_at       | 1.86               | PTPRC         | Protein tyrosine phosphatase, receptor type, C                                          | 5788            |
| 0.0004774      | 213193_x_at     | 1.86               | TRBC1         | T cell receptor beta constant 1                                                         | 28639           |
| 0.0056883      | 205859_at       | 1.86               | LY86          | Lymphocyte antigen 86                                                                   | 9450            |
| 0.0035222      | 200991_s_at     | 1.85               | SNX17         | Sorting nexin 17                                                                        | 9784            |
| 0.0070649      | 218039_at       | 1.85               | NUSAP1        | Nucleolar and spindle associated protein 1                                              | 51203           |
| 0.0097162      | 201792_at       | 1.85               | AEBP1         | AE binding protein 1                                                                    | 165             |
| 9.34E-05       | 204527_at       | 1.84               | MYO5A         | Myosin VA (heavy chain 12, myoxin)                                                      | 4644            |
| 0.0004813      | 208714_at       | 1.84               | NDUFV1        | NADH dehydrogenase (ubiquinone) flavoprotein 1, 51kda                                   | 4723            |
| 0.0006116      | 206950_at       | 1.84               | SCN9A         | Sodium channel, voltage-gated, type IX, alpha subunit                                   | 6335            |
| 0.001354       | 205831_at       | 1.84               | CD2           | CD2 molecule                                                                            | 914             |
| 0.001366       | 219690_at       | 1.84               | TMEM149       | Transmembrane protein 149                                                               | 79713           |
| 0.0002504      | 203741_s_at     | 1.83               | ADCY7         | Adenylatecyclase 7                                                                      | 113             |
| 0.0004006      | 204043_at       | 1.83               | TCN2          | Transcobalamin II                                                                       | 6948            |
| 0.0055901      | 160020_at       | 1.83               | MMP14         | Matrix metalloproteinase 14 (membrane-inserted)                                         | 4323            |
| 0.0002138      | 38671_at        | 1.82               | PLXND1        | Plexin D1                                                                               | 23129           |
| 0.0006014      | 205844_at       | 1.82               | VNN1          | Vanin 1                                                                                 | 8876            |
| 0.001284       | 201040_at       | 1.82               | GNAI2         | Guanine nucleotide binding protein (G protein), alpha inhibiting activity polypeptide 2 | 2771            |
| 0.0037184      | 219656_at       | 1.82               | PCDH12        | Protocadherin 12                                                                        | 51294           |
| 0.0057317      | 217767_at       | 1.82               | C3            | Complement component 3                                                                  | 718             |
| 0.0002367      | 217808_s_at     | 1.81               | MAPKAP1       | Mitogen-activated protein kinase associated protein 1                                   | 79109           |
| 6.55E-05       | 208018_s_at     | 1.8                | HCK           | Hemopoietic cell kinase                                                                 | 3055            |
| 0.0005111      | 218473_s_at     | 1.8                | GLT25D1       | Glycosyltransferase 25 domain containing 1                                              | 79709           |
| 0.0006455      | 208322_s_at     | 1.8                | ST3GAL1       | ST3 beta-galactoside alpha-2,3-sialyltransferase 1                                      | 6482            |
| 0.0009171      | 204959_at       | 1.8                | MNDA          | Myeloid cell nuclear differentiation antigen                                            | 4332            |

| <b>P value</b> | <b>ProbeSet</b> | <b>Fold change</b> | <b>Symbol</b> | <b>Name</b>                                                                             | <b>EntrezID</b> |
|----------------|-----------------|--------------------|---------------|-----------------------------------------------------------------------------------------|-----------------|
| 0.001546       | 212041_at       | 1.8                | ATP6V0D1      | Atpase, H+ transporting, lysosomal 38kda, V0 subunit d1                                 | 9114            |
| 0.0019644      | 206991_s_at     | 1.8                | CCR5          | Chemokine (C-C motif) receptor 5                                                        | 1234            |
| 0.0067198      | 209916_at       | 1.8                | DHTKD1        | Dehydrogenase E1 and transketolase domain containing 1                                  | 55526           |
| 0.0079981      | 218404_at       | 1.8                | SNX10         | Sorting nexin 10                                                                        | 29887           |
| 5.83E-05       | 209380_s_at     | 1.79               | ABCC5         | ATP-binding cassette, sub-family C (CFTR/MRP), member 5                                 | 10057           |
| 8.88E-05       | 205639_at       | 1.79               | AOAH          | Acyloxyacyl hydrolase (neutrophil)                                                      | 313             |
| 0.0002792      | 220005_at       | 1.79               | P2RY13        | Purinergic receptor P2Y, G-protein coupled, 13                                          | 53829           |
| 0.002107       | 203031_s_at     | 1.79               | UROS          | Uroporphyrinogen III synthase                                                           | 7390            |
| 0.0035817      | 203920_at       | 1.79               | NR1H3         | Nuclear receptor subfamily 1, group H, member 3                                         | 10062           |
| 0.0048839      | 202009_at       | 1.79               | TWF2          | Twinfilin, actin-binding protein, homolog 2 (Drosophila)                                | 11344           |
| 0.0096355      | 202800_at       | 1.79               | SLC1A3        | Solute carrier family 1 (glial high affinity glutamate transporter), member 3           | 6507            |
| 0.000347       | 219947_at       | 1.78               | CLEC4A        | C-type lectin domain family 4, member A                                                 | 50856           |
| 0.0012977      | 213603_s_at     | 1.78               | RAC2          | Ras-related C3 botulinum toxin substrate 2 (rho family, small GTP binding protein Rac2) | 5880            |
| 0.0026926      | 203148_s_at     | 1.78               | TRIM14        | Tripartite motif-containing 14                                                          | 9830            |
| 0.0038428      | 203167_at       | 1.78               | TIMP2         | TIMP metallopeptidase inhibitor 2                                                       | 7077            |
| 0.0006321      | 213888_s_at     | 1.77               | TRAF3IP3      | TRAF3 interacting protein 3                                                             | 80342           |
| 0.0016971      | 209166_s_at     | 1.77               | MAN2B1        | Mannosidase, alpha, class 2B, member 1                                                  | 4125            |
| 0.0075676      | 204563_at       | 1.77               | SELL          | Selectin L                                                                              | 6402            |
| 2.92E-05       | 206631_at       | 1.76               | PTGER2        | Prostaglandin E receptor 2 (subtype EP2), 53kda                                         | 5732            |
| 0.0002758      | 207651_at       | 1.76               | GPR171        | G protein-coupled receptor 171                                                          | 29909           |
| 0.0040894      | 1294_at         | 1.76               | UBA7          | Ubiquitin-like modifier activating enzyme 7                                             | 7318            |
| 0.0008478      | 210589_s_at     | 1.75               | GBAP1         | Glucosidase, beta, acid pseudogene 1                                                    | 2630            |
| 0.0015351      | 218376_s_at     | 1.75               | MICAL1        | Microtubule associated monooxygenase, calponin and LIM domain containing 1              | 64780           |
| 0.0017475      | 204924_at       | 1.75               | TLR2          | Toll-like receptor 2                                                                    | 7097            |
| 0.0024441      | 211576_s_at     | 1.75               | SLC19A1       | Solute carrier family 19 (folate transporter), member 1                                 | 6573            |
| 7.66E-05       | 204328_at       | 1.74               | TMC6          | Transmembrane channel-like 6                                                            | 11322           |
| 0.000266       | 202974_at       | 1.74               | MPP1          | Membrane protein, palmitoylated 1, 55kda                                                | 4354            |
| 0.0005955      | 209619_at       | 1.74               | CD74          | CD74 molecule, major histocompatibility complex, class II invariant chain               | 972             |
| 0.0024953      | 40420_at        | 1.74               | STK10         | Serine/threonine kinase 10                                                              | 6793            |
| 0.0031448      | 202589_at       | 1.74               | TYMS          | Thymidylatesynthetase                                                                   | 7298            |
| 0.0061148      | 212884_x_at     | 1.74               | APOE          | Apolipoprotein E                                                                        | 348             |
| 0.0070728      | 210314_x_at     | 1.74               | TNFSF13       | Tumor necrosis factor (ligand) superfamily, member 13                                   | 8741            |
| 0.0085711      | 221601_s_at     | 1.74               | FAIM3         | Fas apoptotic inhibitory molecule 3                                                     | 9214            |
| 0.008821       | 217984_at       | 1.74               | RNASET2       | Ribonuclease T2                                                                         | 8635            |
| 0.0008281      | 218153_at       | 1.73               | CARS2         | CysteinyI-trna synthetase 2, mitochondrial                                              | 79587           |

| <b>P value</b> | <b>ProbeSet</b> | <b>Fold change</b> | <b>Symbol</b> | <b>Name</b>                                                                    | <b>EntrezID</b> |
|----------------|-----------------|--------------------|---------------|--------------------------------------------------------------------------------|-----------------|
|                |                 |                    |               | (putative)                                                                     |                 |
| 0.0008441      | 214085_x_at     | 1.73               | GLIPR1        | GLI pathogenesis-related 1                                                     | 11010           |
| 0.0009032      | 203932_at       | 1.73               | HLA-DMB       | Major histocompatibility complex, class II, DM beta                            | 3109            |
| 0.001095       | 202767_at       | 1.73               | ACP2          | Acid phosphatase 2, lysosomal                                                  | 53              |
| 0.0036341      | 200913_at       | 1.73               | PPM1G         | Protein phosphatase, Mg2+/Mn2+ dependent, 1G                                   | 5496            |
| 0.0057455      | 219628_at       | 1.73               | ZMAT3         | Zinc finger, matrin-type 3                                                     | 64393           |
| 0.0060792      | 211047_x_at     | 1.73               | AP2S1         | Adaptor-related protein complex 2, sigma 1 subunit                             | 1175            |
| 0.0084245      | 35626_at        | 1.73               | SGSH          | N-sulfoglucosamininesulfohydrolase                                             | 6448            |
| 5.29E-05       | 201576_s_at     | 1.72               | GLB1          | Galactosidase, beta 1                                                          | 2720            |
| 0.0020519      | 221734_at       | 1.72               | PRRC1         | Proline-rich coiled-coil 1                                                     | 133619          |
| 0.0068452      | 202201_at       | 1.72               | BLVRB         | Biliverdinreductase B (flavinreductase (NADPH))                                | 645             |
| 0.0078814      | 212359_s_at     | 1.72               | KIAA0913      | Kiaa0913                                                                       | 23053           |
| 0.0002697      | 206687_s_at     | 1.71               | PTPN6         | Protein tyrosine phosphatase, non-receptor type 6                              | 5777            |
| 0.0035257      | 202954_at       | 1.71               | UBE2C         | Ubiquitin-conjugating enzyme E2C                                               | 11065           |
| 0.0059633      | 208079_s_at     | 1.71               | AURKA         | Aurora kinase A                                                                | 6790            |
| 0.00637        | 221019_s_at     | 1.7                | COLEC12       | Collectin sub-family member 12                                                 | 81035           |
| 1.69E-05       | 205401_at       | 1.69               | AGPS          | Alkylglycerone phosphate synthase                                              | 8540            |
| 0.0009975      | 201584_s_at     | 1.69               | DDX39         | DEAD (Asp-Glu-Ala-Asp) box polypeptide 39                                      | 10212           |
| 0.0012409      | 211833_s_at     | 1.69               | BAX           | BCL2-associated X protein                                                      | 581             |
| 0.0012934      | 214687_x_at     | 1.69               | ALDOA         | Aldolase A, fructose-bisphosphate                                              | 226             |
| 4.52E-05       | 201609_x_at     | 1.68               | ICMT          | Isoprenylcysteine carboxyl methyltransferase                                   | 23463           |
| 0.0006174      | 200600_at       | 1.68               | MSN           | Moesin                                                                         | 4478            |
| 0.0017849      | 204982_at       | 1.68               | GIT2          | G protein-coupled receptor kinase interacting arfgap 2                         | 9815            |
| 0.002366       | 207163_s_at     | 1.68               | AKT1          | V-akt murine thymoma viral oncogene homolog 1                                  | 207             |
| 0.0060062      | 207857_at       | 1.68               | LILRA2        | Leukocyte immunoglobulin-like receptor, subfamily A (with TM domain), member 2 | 11027           |
| 0.0014717      | 211339_s_at     | 1.67               | ITK           | IL2-inducible T-cell kinase                                                    | 3702            |
| 0.0013596      | 202869_at       | 1.66               | OAS1          | 2',5'-oligoadenylate synthetase 1, 40/46kda                                    | 4938            |
| 0.0014135      | 202860_at       | 1.66               | DENND4B       | DENN/MADD domain containing 4B                                                 | 9909            |
| 0.007904       | 200923_at       | 1.66               | LGALS3BP      | Lectin, galactoside-binding, soluble, 3 binding protein                        | 3959            |
| 8.36E-05       | 211974_x_at     | 1.65               | RBPJ          | Recombination signal binding protein for immunoglobulin kappa J region         | 3516            |
| 0.0009343      | 204502_at       | 1.65               | SAMHD1        | SAM domain and HD domain 1                                                     | 25939           |
| 0.0014043      | 203332_s_at     | 1.65               | INPP5D        | Inositol polyphosphate-5-phosphatase, 145kda                                   | 3635            |
| 0.0024272      | 204458_at       | 1.65               | PLA2G15       | Phospholipase A2, group XV                                                     | 23659           |
| 0.0041796      | 210762_s_at     | 1.65               | DLC1          | Deleted in liver cancer 1                                                      | 10395           |
| 0.004481       | 212890_at       | 1.65               | SLC38A10      | Solute carrier family 38, member 10                                            | 124565          |
| 0.0002918      | 212975_at       | 1.64               | DENND3        | DENN/MADD domain containing 3                                                  | 22898           |

| <b>P value</b> | <b>ProbeSet</b> | <b>Fold change</b> | <b>Symbol</b> | <b>Name</b>                                                                              | <b>EntrezID</b> |
|----------------|-----------------|--------------------|---------------|------------------------------------------------------------------------------------------|-----------------|
| 0.0016458      | 210140_at       | 1.64               | CST7          | Cystatin F (leukocystatin)                                                               | 8530            |
| 0.0021696      | 200001_at       | 1.64               | CAPNS1        | Calpain, small subunit 1                                                                 | 826             |
| 0.0041401      | 212350_at       | 1.64               | TBC1D1        | TBC1 (tre-2/USP6, BUB2, cdc16) domain family, member 1                                   | 23216           |
| 0.0044369      | 214467_at       | 1.64               | GPR65         | G protein-coupled receptor 65                                                            | 8477            |
| 0.0063467      | 203717_at       | 1.64               | DPP4          | Dipeptidyl-peptidase 4                                                                   | 1803            |
| 0.0004576      | 210146_x_at     | 1.63               | LILRB2        | Leukocyte immunoglobulin-like receptor, subfamily B (with TM and ITIM domains), member 2 | 10288           |
| 0.0007975      | 207224_s_at     | 1.63               | SIGLEC7       | Sialic acid binding Ig-like lectin 7                                                     | 27036           |
| 0.0008625      | 203755_at       | 1.63               | BUB1B         | Budding uninhibited by benzimidazoles 1 homolog beta (yeast)                             | 701             |
| 0.0018493      | 210746_s_at     | 1.63               | EPB42         | Erythrocyte membrane protein band 4.2                                                    | 2038            |
| 0.0047698      | 209042_s_at     | 1.63               | UBE2G2        | Ubiquitin-conjugating enzyme E2G 2 (UBC7 homolog, yeast)                                 | 7327            |
| 0.0051035      | 202030_at       | 1.63               | BCKDK         | Branched chain ketoacid dehydrogenase kinase                                             | 10295           |
| 0.0097151      | 216264_s_at     | 1.63               | LAMB2         | Laminin, beta 2 (laminin S)                                                              | 3913            |
| 6.44E-05       | 207992_s_at     | 1.62               | AMPD3         | Adenosine monophosphate deaminase 3                                                      | 272             |
| 7.72E-05       | 33197_at        | 1.62               | MYO7A         | Myosin VIIA                                                                              | 4647            |
| 0.0002782      | 201278_at       | 1.62               | DAB2          | Disabled homolog 2, mitogen-responsive phosphoprotein (Drosophila)                       | 1601            |
| 0.0003789      | 201186_at       | 1.62               | LRPAP1        | Low density lipoprotein receptor-related protein associated protein 1                    | 4043            |
| 0.0022893      | 216237_s_at     | 1.62               | MCM5          | Minichromosome maintenance complex component 5                                           | 4174            |
| 0.0041552      | 211474_s_at     | 1.62               | SERPINB6      | Serpin peptidase inhibitor, clade B (ovalbumin), member 6                                | 5269            |
| 0.0044496      | 213045_at       | 1.62               | MAST3         | Microtubule associated serine/threonine kinase 3                                         | 23031           |
| 0.0050931      | 217838_s_at     | 1.62               | EVL           | Enah/Vasp-like                                                                           | 51466           |
| 0.0084076      | 213733_at       | 1.62               | MYO1F         | Myosin IF                                                                                | 4542            |
| 0.0011107      | 200616_s_at     | 1.61               | MLEC          | Malectin                                                                                 | 9761            |
| 0.0028439      | 203262_s_at     | 1.61               | FAM50A        | Family with sequence similarity 50, member A                                             | 9130            |
| 0.003289       | 207809_s_at     | 1.61               | ATP6AP1       | Atpase, H+ transporting, lysosomal accessory protein 1                                   | 537             |
| 0.0045052      | 204319_s_at     | 1.61               | RGS10         | Regulator of G-protein signaling 10                                                      | 6001            |
| 0.0051582      | 202207_at       | 1.61               | ARL4C         | ADP-ribosylation factor-like 4C                                                          | 10123           |
| 0.0050543      | 218291_at       | 1.6                | ROBLD3        | Roadblock domain containing 3                                                            | 28956           |
| 0.005689       | 204825_at       | 1.6                | MELK          | Maternal embryonic leucine zipper kinase                                                 | 9833            |
| 0.0070369      | 215075_s_at     | 1.6                | GRB2          | Growth factor receptor-bound protein 2                                                   | 2885            |
| 0.0009785      | 200720_s_at     | 1.59               | ACTR1A        | ARP1 actin-related protein 1 homolog A, cetractin alpha (yeast)                          | 10121           |
| 0.0025211      | 201126_s_at     | 1.59               | MGAT1         | Mannosyl (alpha-1,3-)-glycoprotein beta-1,2-N-acetylglucosaminyltransferase              | 4245            |
| 0.0057071      | 204958_at       | 1.59               | PLK3          | Polo-like kinase 3                                                                       | 1263            |
| 0.0097697      | 208308_s_at     | 1.59               | GPI           | Glucose-6-phosphate isomerase                                                            | 2821            |

| <b>P value</b> | <b>ProbeSet</b> | <b>Fold change</b> | <b>Symbol</b> | <b>Name</b>                                                                  | <b>EntrezID</b> |
|----------------|-----------------|--------------------|---------------|------------------------------------------------------------------------------|-----------------|
| 0.0015209      | 210164_at       | 1.58               | GZMB          | Granzyme B (granzyme 2, cytotoxic T-lymphocyte-associated serine esterase 1) | 3002            |
| 0.0018803      | 212663_at       | 1.58               | FKBP15        | FK506 binding protein 15, 133kda                                             | 23307           |
| 0.001934       | 221756_at       | 1.58               | PIK3IP1       | Phosphoinositide-3-kinase interacting protein 1                              | 113791          |
| 0.0022655      | 219862_s_at     | 1.58               | NARF          | Nuclear prelamin A recognition factor                                        | 26502           |
| 0.0028449      | 202897_at       | 1.58               | SIRPA         | Signal-regulatory protein alpha                                              | 140885          |
| 0.0039984      | 219020_at       | 1.58               | HS1BP3        | HCLS1 binding protein 3                                                      | 64342           |
| 0.0048098      | 200982_s_at     | 1.58               | ANXA6         | Annexin A6                                                                   | 309             |
| 0.0048242      | 39817_s_at      | 1.58               | C6orf108      | Chromosome 6 open reading frame 108                                          | 10591           |
| 0.0077302      | 211714_x_at     | 1.58               | TUBB          | Tubulin, beta                                                                | 203068          |
| 0.0080273      | 208918_s_at     | 1.58               | NADK          | NAD kinase                                                                   | 65220           |
| 0.0006195      | 218257_s_at     | 1.57               | UGGT1         | UDP-glucose glycoprotein glucosyltransferase 1                               | 56886           |
| 0.0008328      | 208829_at       | 1.57               | TAPBP         | TAP binding protein (tapasin)                                                | 6892            |
| 0.0012579      | 220007_at       | 1.57               | METTL8        | Methyltransferase like 8                                                     | 79828           |
| 0.0016461      | 204567_s_at     | 1.57               | ABCG1         | ATP-binding cassette, sub-family G (WHITE), member 1                         | 9619            |
| 0.0033089      | 218072_at       | 1.57               | COMMD9        | COMM domain containing 9                                                     | 29099           |
| 0.003407       | 220155_s_at     | 1.57               | BRD9          | Bromodomain containing 9                                                     | 65980           |
| 0.0053727      | 207565_s_at     | 1.57               | MR1           | Major histocompatibility complex, class I-related                            | 3140            |
| 0.0084286      | 201292_at       | 1.57               | TOP2A         | Topoisomerase (DNA) II alpha 170kda                                          | 7153            |
| 0.0003661      | 207072_at       | 1.56               | IL18RAP       | Interleukin 18 receptor accessory protein                                    | 8807            |
| 0.0007711      | 204061_at       | 1.56               | PRKX          | Protein kinase, X-linked                                                     | 5613            |
| 0.0008032      | 201647_s_at     | 1.56               | SCARB2        | Scavenger receptor class B, member 2                                         | 950             |
| 0.0014832      | 209420_s_at     | 1.56               | SMPD1         | Sphingomyelinphosphodiesterase 1, acid lysosomal                             | 6609            |
| 0.0017169      | 201252_at       | 1.56               | PSMC4         | Proteasome (prosome, macropain) 26S subunit, atpase, 4                       | 5704            |
| 0.004764       | 205721_at       | 1.56               | GFRA2         | GDNF family receptor alpha 2                                                 | 2675            |
| 0.0053109      | 209345_s_at     | 1.56               | PI4K2A        | Phosphatidylinositol 4-kinase type 2 alpha                                   | 55361           |
| 0.0088935      | 202154_x_at     | 1.56               | TUBB3         | Tubulin, beta 3                                                              | 10381           |
| 0.0008074      | 206206_at       | 1.55               | CD180         | CD180 molecule                                                               | 4064            |
| 0.0023078      | 204135_at       | 1.55               | FILIP1L       | Filamin A interacting protein 1-like                                         | 11259           |
| 0.0024366      | 203185_at       | 1.55               | RASSF2        | Ras association (ralgds/AF-6) domain family member 2                         | 9770            |
| 0.0026621      | 206335_at       | 1.55               | GALNS         | Galactosamine (N-acetyl)-6-sulfate sulfatase                                 | 2588            |
| 0.0028571      | 200905_x_at     | 1.55               | HLA-E         | Major histocompatibility complex, class I, E                                 | 3133            |
| 0.0035179      | 202397_at       | 1.55               | NUTF2         | Nuclear transport factor 2                                                   | 10204           |
| 0.0073776      | 204114_at       | 1.55               | NID2          | Nidogen 2 (osteonidogen)                                                     | 22795           |
| 0.00767        | 40665_at        | 1.55               | FMO3          | Flavin containing monooxygenase 3                                            | 2328            |
| 3.81E-05       | 219033_at       | 1.54               | PARP8         | Poly (ADP-ribose) polymerase family, member 8                                | 79668           |
| 0.0004543      | 217764_s_at     | 1.54               | RAB31         | RAB31, member RAS oncogene family                                            | 11031           |
| 0.0007721      | 205105_at       | 1.54               | MAN2A1        | Mannosidase, alpha, class 2A, member 1                                       | 4124            |

| <b>P value</b> | <b>ProbeSet</b> | <b>Fold change</b> | <b>Symbol</b> | <b>Name</b>                                                     | <b>EntrezID</b> |
|----------------|-----------------|--------------------|---------------|-----------------------------------------------------------------|-----------------|
| 0.0007742      | 221653_x_at     | 1.54               | APOL2         | Apolipoprotein L, 2                                             | 23780           |
| 0.0020266      | 204137_at       | 1.54               | GPR137B       | G protein-coupled receptor 137B                                 | 7107            |
| 0.0031691      | 202625_at       | 1.54               | LYN           | V-yes-1 Yamaguchi sarcoma viral related oncogene homolog        | 4067            |
| 0.0042926      | 219696_at       | 1.54               | DENND1B       | DENN/MADD domain containing 1B                                  | 163486          |
| 0.007025       | 37966_at        | 1.54               | PARVB         | Parvin, beta                                                    | 29780           |
| 7.85E-05       | 206060_s_at     | 1.53               | PTPN22        | Protein tyrosine phosphatase, non-receptor type 22 (lymphoid)   | 26191           |
| 0.0008536      | 202087_s_at     | 1.53               | CTSL1         | Cathepsin L1                                                    | 1514            |
| 0.0037675      | 221561_at       | 1.53               | SOAT1         | Sterol O-acyltransferase 1                                      | 6646            |
| 0.0038042      | 209980_s_at     | 1.53               | SHMT1         | Serine hydroxymethyltransferase 1 (soluble)                     | 6470            |
| 0.0043401      | 203514_at       | 1.53               | MAP3K3        | Mitogen-activated protein kinase kinase kinase 3                | 4215            |
| 0.0003892      | 206171_at       | 1.52               | ADORA3        | Adenosine A3 receptor                                           | 140             |
| 0.0027588      | 210609_s_at     | 1.52               | TP53I3        | Tumor protein p53 inducible protein 3                           | 9540            |
| 0.0043028      | 202041_s_at     | 1.52               | FIBP          | Fibroblast growth factor (acidic) intracellular binding protein | 9158            |
| 0.0058734      | 217817_at       | 1.52               | ARPC4         | Actin related protein 2/3 complex, subunit 4, 20kda             | 10093           |
| 0.0087853      | 211964_at       | 1.52               | COL4A2        | Collagen, type IV, alpha 2                                      | 1284            |
| 0.009711       | 205403_at       | 1.52               | IL1R2         | Interleukin 1 receptor, type II                                 | 7850            |
| 3.53E-05       | 212418_at       | 1.51               | ELF1          | E74-like factor 1 (ets domain transcription factor)             | 1997            |
| 0.0005196      | 203320_at       | 1.51               | SH2B3         | SH2B adaptor protein 3                                          | 10019           |
| 0.0009609      | 218856_at       | 1.51               | TNFRSF21      | Tumor necrosis factor receptor superfamily, member 21           | 27242           |
| 0.0016222      | 202155_s_at     | 1.51               | NUP214        | Nucleoporin 214kda                                              | 8021            |
| 0.0042344      | 219032_x_at     | 1.51               | OPN3          | Opsin 3                                                         | 23596           |
| 0.0062309      | 217751_at       | 1.51               | GSTK1         | Glutathione S-transferase kappa 1                               | 373156          |
| 0.0067569      | 202948_at       | 1.51               | IL1R1         | Interleukin 1 receptor, type I                                  | 3554            |
| 0.0070047      | 219256_s_at     | 1.51               | SH3TC1        | SH3 domain and tetratricopeptide repeats 1                      | 54436           |
| 5.52E-05       | 219763_at       | 1.5                | DENND1A       | DENN/MADD domain containing 1A                                  | 57706           |
| 0.0004536      | 204362_at       | 1.5                | SKAP2         | Src kinase associated phosphoprotein 2                          | 8935            |
| 0.0026202      | 218009_s_at     | 1.5                | PRC1          | Protein regulator of cytokinesis 1                              | 9055            |
| 0.0035718      | 202185_at       | 1.5                | PLOD3         | Procollagen-lysine, 2-oxoglutarate 5-dioxygenase 3              | 8985            |
| 0.0063867      | 209953_s_at     | 1.5                | CDC37         | Cell division cycle 37 homolog (S. Cerevisiae)                  | 11140           |
| 0.0077429      | 200919_at       | 1.5                | PHC2          | Polyhomeotic homolog 2 (Drosophila)                             | 1912            |
| 4.08E-05       | 205687_at       | 1.49               | UBFD1         | Ubiquitin family domain containing 1                            | 56061           |
| 0.0005833      | 209232_s_at     | 1.49               | DCTN5         | Dynactin 5 (p25)                                                | 84516           |
| 0.001342       | 209575_at       | 1.49               | IL10RB        | Interleukin 10 receptor, beta                                   | 3588            |
| 0.0020352      | 201826_s_at     | 1.49               | SCCPDH        | Saccharopine dehydrogenase (putative)                           | 51097           |
| 0.0047998      | 208659_at       | 1.49               | CLIC1         | Chloride intracellular channel 1                                | 1192            |
| 0.0060884      | 205024_s_at     | 1.49               | RAD51         | RAD51 homolog (reca homolog, E. Coli) (S. Cerevisiae)           | 5888            |
| 0.0072847      | 219402_s_at     | 1.49               | DERL1         | Der1-like domain family, member 1                               | 79139           |

| <b>P value</b> | <b>ProbeSet</b> | <b>Fold change</b> | <b>Symbol</b> | <b>Name</b>                                                                                                      | <b>EntrezID</b> |
|----------------|-----------------|--------------------|---------------|------------------------------------------------------------------------------------------------------------------|-----------------|
| 0.000205       | 203912_s_at     | 1.48               | DNASE1L1      | Deoxyribonuclease I-like 1                                                                                       | 1774            |
| 0.0002073      | 217865_at       | 1.48               | RNF130        | Ring finger protein 130                                                                                          | 55819           |
| 0.001109       | 213475_s_at     | 1.48               | ITGAL         | Integrin, alpha L (antigen CD11A (p180), lymphocyte function-associated antigen 1; alpha polypeptide)            | 3683            |
| 0.0013865      | 218474_s_at     | 1.48               | KCTD5         | Potassium channel tetramerisation domain containing 5                                                            | 54442           |
| 0.001597       | 203530_s_at     | 1.48               | STX4          | Syntaxin 4                                                                                                       | 6810            |
| 0.0023796      | 205101_at       | 1.48               | CIITA         | Class II, major histocompatibility complex, transactivator                                                       | 4261            |
| 0.0029227      | 206540_at       | 1.48               | GLB1L         | Galactosidase, beta 1-like                                                                                       | 79411           |
| 0.0040458      | 204640_s_at     | 1.48               | SPOP          | Speckle-type POZ protein                                                                                         | 8405            |
| 0.0093692      | 203475_at       | 1.48               | CYP19A1       | Cytochrome P450, family 19, subfamily A, polypeptide 1                                                           | 1588            |
| 0.0019385      | 204861_s_at     | 1.47               | NAIP          | NLR family, apoptosis inhibitory protein                                                                         | 4671            |
| 0.0035287      | 207734_at       | 1.47               | LAX1          | Lymphocyte transmembrane adaptor 1                                                                               | 54900           |
| 0.003988       | 202106_at       | 1.47               | GOLGA3        | Golgin A3                                                                                                        | 2802            |
| 0.0043382      | 212791_at       | 1.47               | C1orf216      | Chromosome 1 open reading frame 216                                                                              | 127703          |
| 0.005006       | 219394_at       | 1.47               | PGS1          | Phosphatidylglycerophosphate synthase 1                                                                          | 9489            |
| 0.0051754      | 212681_at       | 1.47               | EPB41L3       | Erythrocyte membrane protein band 4.1-like 3                                                                     | 23136           |
| 0.0060446      | 200788_s_at     | 1.47               | PEA15         | Phosphoprotein enriched in astrocytes 15                                                                         | 8682            |
| 0.006624       | 208630_at       | 1.47               | HADHA         | Hydroxyacyl-coa dehydrogenase/3-ketoacyl-coa thiolase/enoyl-coa hydratase (trifunctional protein), alpha subunit | 3030            |
| 0.0076025      | 203118_at       | 1.47               | PCSK7         | Proprotein convertase subtilisin/kexin type 7                                                                    | 9159            |
| 0.0089952      | 215764_x_at     | 1.47               | AP2A2         | Adaptor-related protein complex 2, alpha 2 subunit                                                               | 161             |
| 0.0093478      | 205423_at       | 1.47               | AP1B1         | Adaptor-related protein complex 1, beta 1 subunit                                                                | 162             |
| 0.0010918      | 209627_s_at     | 1.46               | OSBPL3        | Oxysterol binding protein-like 3                                                                                 | 26031           |
| 0.0019384      | 211794_at       | 1.46               | FYB           | FYN binding protein                                                                                              | 2533            |
| 0.004073       | 202664_at       | 1.46               | WIPF1         | WAS/WASL interacting protein family, member 1                                                                    | 7456            |
| 0.0043045      | 201991_s_at     | 1.46               | KIF5B         | Kinesin family member 5B                                                                                         | 3799            |
| 4.49E-05       | 218109_s_at     | 1.45               | MFSD1         | Major facilitator superfamily domain containing 1                                                                | 64747           |
| 0.0001465      | 210114_at       | 1.45               | INVS          | Inversin                                                                                                         | 27130           |
| 0.0015073      | 201000_at       | 1.45               | AARS          | Alanyl-trna synthetase                                                                                           | 16              |
| 0.0016172      | 217754_at       | 1.45               | DDX56         | DEAD (Asp-Glu-Ala-Asp) box polypeptide 56                                                                        | 54606           |
| 0.0017242      | 205821_at       | 1.45               | KLRK1         | Killer cell lectin-like receptor subfamily K, member 1                                                           | 22914           |
| 0.0020522      | 219460_s_at     | 1.45               | TMEM127       | Transmembrane protein 127                                                                                        | 55654           |
| 0.0027139      | 219316_s_at     | 1.45               | FLVCR2        | Feline leukemia virus subgroup C cellular receptor family, member 2                                              | 55640           |
| 0.0039929      | 201620_at       | 1.45               | MBTPS1        | Membrane-bound transcription factor peptidase, site 1                                                            | 8720            |
| 0.0053972      | 218282_at       | 1.45               | EDEM2         | ER degradation enhancer, mannosidase alpha-like 2                                                                | 55741           |
| 0.0003835      | 205046_at       | 1.44               | CENPE         | Centromere protein E, 312kda                                                                                     | 1062            |



| <b>P value</b> | <b>ProbeSet</b> | <b>Fold change</b> | <b>Symbol</b> | <b>Name</b>                                                                              | <b>EntrezID</b> |
|----------------|-----------------|--------------------|---------------|------------------------------------------------------------------------------------------|-----------------|
| 0.000389       | 204891_s_at     | 1.44               | LCK           | Lymphocyte-specific protein tyrosine kinase                                              | 3932            |
| 0.0009511      | 219366_at       | 1.44               | AVEN          | Apoptosis, caspase activation inhibitor                                                  | 57099           |
| 0.0032752      | 209828_s_at     | 1.44               | IL16          | Interleukin 16 (lymphocyte chemoattractant factor)                                       | 3603            |
| 0.0065715      | 222218_s_at     | 1.44               | PILRA         | Paired immunoglobulin-like type 2 receptor alpha                                         | 29992           |
| 0.0098421      | 204204_at       | 1.44               | SLC31A2       | Solute carrier family 31 (copper transporters), member 2                                 | 1318            |
| 0.0004501      | 217789_at       | 1.43               | SNX6          | Sorting nexin 6                                                                          | 58533           |
| 0.001039       | 212638_s_at     | 1.43               | WWP1          | WW domain containing E3 ubiquitin protein ligase 1                                       | 11059           |
| 0.0011595      | 201125_s_at     | 1.43               | ITGB5         | Integrin, beta 5                                                                         | 3693            |
| 0.0027317      | 202483_s_at     | 1.43               | RANBP1        | RAN binding protein 1                                                                    | 5902            |
| 0.0029825      | 207655_s_at     | 1.43               | BLNK          | B-cell linker                                                                            | 29760           |
| 0.0033003      | 201587_s_at     | 1.43               | IRAK1         | Interleukin-1 receptor-associated kinase 1                                               | 3654            |
| 0.0083799      | 219001_s_at     | 1.43               | DCAF10        | DDB1 and CUL4 associated factor 10                                                       | 79269           |
| 0.0085611      | 211373_s_at     | 1.43               | PSEN2         | Presenilin 2 (Alzheimer disease 4)                                                       | 5664            |
| 0.0007372      | 207233_s_at     | 1.42               | MITF          | Microphthalmia-associated transcription factor                                           | 4286            |
| 0.0017736      | 204174_at       | 1.42               | ALOX5AP       | Arachidonate 5-lipoxygenase-activating protein                                           | 241             |
| 0.0035748      | 212268_at       | 1.42               | SERPINB1      | Serpin peptidase inhibitor, clade B (ovalbumin), member 1                                | 1992            |
| 0.0083627      | 203206_at       | 1.42               | FAM53B        | Family with sequence similarity 53, member B                                             | 9679            |
| 0.0003913      | 209553_at       | 1.41               | VPS8          | Vacuolar protein sorting 8 homolog (S. Cerevisiae)                                       | 23355           |
| 0.0021424      | 203139_at       | 1.41               | DAPK1         | Death-associated protein kinase 1                                                        | 1612            |
| 0.0032593      | 213290_at       | 1.41               | COL6A2        | Collagen, type VI, alpha 2                                                               | 1292            |
| 0.0034542      | 219892_at       | 1.41               | TM6SF1        | Transmembrane 6 superfamily member 1                                                     | 53346           |
| 0.007052       | 205039_s_at     | 1.41               | IKZF1         | IKAROS family zinc finger 1 (Ikaros)                                                     | 10320           |
| 0.0098175      | 218454_at       | 1.41               | PLBD1         | Phospholipase B domain containing 1                                                      | 79887           |
| 7.10E-06       | 202347_s_at     | 1.4                | UBE2K         | Ubiquitin-conjugating enzyme E2K (UBC1 homolog, yeast)                                   | 3093            |
| 0.0007924      | 208620_at       | 1.4                | PCBP1         | Poly(rc) binding protein 1                                                               | 5093            |
| 0.0010392      | 209467_s_at     | 1.4                | MKMK1         | MAP kinase interacting serine/threonine kinase 1                                         | 8569            |
| 0.0015776      | 206200_s_at     | 1.4                | ANXA11        | Annexin A11                                                                              | 311             |
| 0.0030367      | 221036_s_at     | 1.4                | APH1B         | Anterior pharynx defective 1 homolog B (C. Elegans)                                      | 83464           |
| 0.0030371      | 219694_at       | 1.4                | FAM105A       | Family with sequence similarity 105, member A                                            | 54491           |
| 0.0044149      | 220199_s_at     | 1.4                | AIDA          | Axin interactor, dorsalization associated                                                | 64853           |
| 0.0050279      | 219289_at       | 1.4                | HEATR3        | HEAT repeat containing 3                                                                 | 55027           |
| 0.0064185      | 204247_s_at     | 1.4                | CDK5          | Cyclin-dependent kinase 5                                                                | 1020            |
| 0.0070031      | 202157_s_at     | 1.4                | CELF2         | CUGBP, Elav-like family member 2                                                         | 10659           |
| 0.0078018      | 203878_s_at     | 1.4                | MMP11         | Matrix metalloproteinase 11 (stromelysin 3)                                              | 4320            |
| 0.0078565      | 218078_s_at     | 1.4                | ZDHHC3        | Zinc finger, DHHC-type containing 3                                                      | 51304           |
| 0.0080635      | 206856_at       | 1.4                | LILRB5        | Leukocyte immunoglobulin-like receptor, subfamily B (with TM and ITIM domains), member 5 | 10990           |

| <b>P value</b> | <b>ProbeSet</b> | <b>Fold change</b> | <b>Symbol</b> | <b>Name</b>                                                                                    | <b>EntrezID</b> |
|----------------|-----------------|--------------------|---------------|------------------------------------------------------------------------------------------------|-----------------|
| 0.0092904      | 200830_at       | 1.4                | PSMD2         | Proteasome (prosome, macropain) 26S subunit, non-atpase, 2                                     | 5708            |
| 4.60E-05       | 212880_at       | 1.39               | WDR7          | WD repeat domain 7                                                                             | 23335           |
| 0.0004985      | 217947_at       | 1.39               | CMTM6         | CKLF-like MARVEL transmembrane domain containing 6                                             | 54918           |
| 0.0024976      | 213379_at       | 1.39               | COQ2          | Coenzyme Q2 homolog, prenyltransferase (yeast)                                                 | 27235           |
| 0.0028009      | 201966_at       | 1.39               | NDUFS2        | NADH dehydrogenase (ubiquinone) Fe-S protein 2, 49kda (NADH-coenzyme Q reductase)              | 4720            |
| 0.0063421      | 218673_s_at     | 1.39               | ATG7          | ATG7 autophagy related 7 homolog (S. Cerevisiae)                                               | 10533           |
| 0.0066589      | 209846_s_at     | 1.39               | BTN3A2        | Butyrophilin, subfamily 3, member A2                                                           | 11118           |
| 0.0094954      | 204131_s_at     | 1.39               | FOXO3         | Forkhead box O3                                                                                | 2309            |
| 0.0009929      | 217759_at       | 1.38               | TRIM44        | Tripartite motif-containing 44                                                                 | 54765           |
| 0.0011088      | 219797_at       | 1.38               | MGAT4A        | Mannosyl (alpha-1,3-)-glycoprotein beta-1,4-N-acetylglucosaminyltransferase, isozyme A         | 11320           |
| 0.0023366      | 202580_x_at     | 1.38               | FOXM1         | Forkhead box M1                                                                                | 2305            |
| 0.0027459      | 218358_at       | 1.38               | CRELD2        | Cysteine-rich with EGF-like domains 2                                                          | 79174           |
| 0.0030845      | 206483_at       | 1.38               | LRR6          | Leucine rich repeat containing 6                                                               | 23639           |
| 0.0040527      | 201729_s_at     | 1.38               | KIAA0100      | Kiaa0100                                                                                       | 9703            |
| 0.0047312      | 205981_s_at     | 1.38               | ING2          | Inhibitor of growth family, member 2                                                           | 3622            |
| 0.0057022      | 219574_at       | 1.38               | MARCH1        | Membrane-associated ring finger (C3HC4) 1                                                      | 55016           |
| 0.0062933      | 217788_s_at     | 1.38               | GALNT2        | UDP-N-acetyl-alpha-D-galactosamine:polypeptide N-acetylgalactosaminyltransferase 2 (galnac-T2) | 2590            |
| 0.0087652      | 52975_at        | 1.38               | FAM125B       | Family with sequence similarity 125, member B                                                  | 89853           |
| 0.0088771      | 213416_at       | 1.38               | ITGA4         | Integrin, alpha 4 (antigen CD49D, alpha 4 subunit of VLA-4 receptor)                           | 3676            |
| 0.0010668      | 220939_s_at     | 1.37               | DPP8          | Dipeptidyl-peptidase 8                                                                         | 54878           |
| 0.0012123      | 220753_s_at     | 1.37               | CRYL1         | Crystallin, lambda 1                                                                           | 51084           |
| 0.001499       | 220761_s_at     | 1.37               | TAOK3         | TAO kinase 3                                                                                   | 51347           |
| 0.0017655      | 219349_s_at     | 1.37               | EXOC2         | Exocyst complex component 2                                                                    | 55770           |
| 0.0031631      | 201935_s_at     | 1.37               | EIF4G3        | Eukaryotic translation initiation factor 4 gamma, 3                                            | 8672            |
| 0.0097678      | 203744_at       | 1.37               | HMGB3         | High-mobility group box 3                                                                      | 3149            |
| 0.0005012      | 202040_s_at     | 1.36               | KDM5A         | Lysine (K)-specific demethylase 5A                                                             | 5927            |
| 0.0009883      | 214784_x_at     | 1.36               | XPO6          | Exportin 6                                                                                     | 23214           |
| 0.001829       | 201157_s_at     | 1.36               | NMT1          | N-myristoyltransferase 1                                                                       | 4836            |
| 0.002959       | 214830_at       | 1.36               | SLC38A6       | Solute carrier family 38, member 6                                                             | 145389          |
| 0.0048789      | 220416_at       | 1.36               | ATP8B4        | Atpase, class I, type 8B, member 4                                                             | 79895           |
| 0.0070663      | 218543_s_at     | 1.36               | PARP12        | Poly (ADP-ribose) polymerase family, member 12                                                 | 64761           |
| 0.007961       | 205273_s_at     | 1.36               | PITRM1        | Pitriysin metalloproteinase 1                                                                  | 10531           |
| 0.0002226      | 211928_at       | 1.35               | DYNC1H1       | Dynein, cytoplasmic 1, heavy chain 1                                                           | 1778            |
| 0.0011949      | 200882_s_at     | 1.35               | PSMD4         | Proteasome (prosome, macropain) 26S subunit, non-atpase, 4                                     | 5710            |

| <b>P value</b> | <b>ProbeSet</b> | <b>Fold change</b> | <b>Symbol</b> | <b>Name</b>                                                            | <b>EntrezID</b> |
|----------------|-----------------|--------------------|---------------|------------------------------------------------------------------------|-----------------|
| 0.0013871      | 206182_at       | 1.35               | ZNF134        | Zinc finger protein 134                                                | 7693            |
| 0.0025278      | 219618_at       | 1.35               | IRAK4         | Interleukin-1 receptor-associated kinase 4                             | 51135           |
| 0.0078528      | 218672_at       | 1.35               | SCNM1         | Sodium channel modifier 1                                              | 79005           |
| 0.0001658      | 214061_at       | 1.34               | WDR67         | WD repeat domain 67                                                    | 93594           |
| 0.0005614      | 221504_s_at     | 1.34               | ATP6V1H       | Atpase, H+ transporting, lysosomal 50/57kda, V1 subunit H              | 51606           |
| 0.0015329      | 203145_at       | 1.34               | SPAG5         | Sperm associated antigen 5                                             | 10615           |
| 0.0039468      | 203656_at       | 1.34               | FIG4          | FIG4 homolog, SAC1 lipid phosphatase domain containing (S. Cerevisiae) | 9896            |
| 0.0048989      | 219384_s_at     | 1.34               | ADAT1         | Adenosine deaminase, trna-specific 1                                   | 23536           |
| 0.00552        | 212993_at       | 1.34               | NACC2         | NACC family member 2, BEN and BTB (POZ) domain containing              | 138151          |
| 0.0005192      | 203971_at       | 1.33               | SLC31A1       | Solute carrier family 31 (copper transporters), member 1               | 1317            |
| 0.0022448      | 202092_s_at     | 1.33               | ARL2BP        | ADP-ribosylation factor-like 2 binding protein                         | 23568           |
| 0.0022879      | 208628_s_at     | 1.33               | YBX1          | Y box binding protein 1                                                | 4904            |
| 0.006088       | 201272_at       | 1.33               | AKR1B1        | Aldo-ketoreductase family 1, member B1 (aldose reductase)              | 231             |
| 0.0072552      | 220477_s_at     | 1.32               | C20orf30      | Chromosome 20 open reading frame 30                                    | 29058           |
| 0.000871       | 219079_at       | 1.3                | CYB5R4        | Cytochrome b5 reductase 4                                              | 51167           |
| 0.0024161      | 211269_s_at     | 1.3                | IL2RA         | Interleukin 2 receptor, alpha                                          | 3559            |
| 0.0028955      | 212829_at       | 1.3                | PIP4K2A       | Phosphatidylinositol-5-phosphate 4-kinase, type II, alpha              | 5305            |
| 0.002997       | 217978_s_at     | 1.3                | UBE2Q1        | Ubiquitin-conjugating enzyme E2Q family member 1                       | 55585           |
| 0.0031088      | 209397_at       | 1.3                | ME2           | Malic enzyme 2, NAD(+)-dependent, mitochondrial                        | 4200            |
| 0.0015172      | 201573_s_at     | 1.29               | ETF1          | Eukaryotic translation termination factor 1                            | 2107            |
| 0.0028976      | 218271_s_at     | 1.29               | PARL          | Presenilin associated, rhomboid-like                                   | 55486           |
| 0.0062836      | 218659_at       | 1.29               | ASXL2         | Additional sex combs like 2 (Drosophila)                               | 55252           |
| 0.0001192      | 202114_at       | 1.28               | SNX2          | Sorting nexin 2                                                        | 6643            |
| 0.0014989      | 218987_at       | 1.28               | ATF7IP        | Activating transcription factor 7 interacting protein                  | 55729           |
| 0.0032716      | 207671_s_at     | 1.28               | BEST1         | Bestrophin 1                                                           | 7439            |
| 0.0088726      | 202772_at       | 1.28               | HMGCL         | 3-hydroxymethyl-3-methylglutaryl-coa lyase                             | 3155            |
| 0.0011707      | 212724_at       | 1.27               | RND3          | Rho family gtpase 3                                                    | 390             |
| 0.0026684      | 204479_at       | 1.27               | OSTF1         | Osteoclast stimulating factor 1                                        | 26578           |
| 0.006826       | 219284_at       | 1.27               | HSPBAP1       | HSPB (heat shock 27kda) associated protein 1                           | 79663           |
| 0.0073004      | 209450_at       | 1.27               | OSGEP         | O-sialoglycoproteinendopeptidase                                       | 55644           |
| 0.0098492      | 205707_at       | 1.27               | IL17RA        | Interleukin 17 receptor A                                              | 23765           |
| 0.0027353      | 218763_at       | 1.26               | STX18         | Syntaxin 18                                                            | 53407           |
| 0.0032788      | 202188_at       | 1.26               | NUP93         | Nucleoporin 93kda                                                      | 9688            |
| 0.0042767      | 203776_at       | 1.26               | GPKOW         | G patch domain and KOW motifs                                          | 27238           |
| 0.0056457      | 217792_at       | 1.26               | SNX5          | Sorting nexin 5                                                        | 27131           |
| 0.0065087      | 208693_s_at     | 1.26               | GARS          | Glycyl-trna synthetase                                                 | 2617            |
| 0.0066741      | 221605_s_at     | 1.26               | PIPOX         | Pipelicolic acid oxidase                                               | 51268           |

| <b>P value</b> | <b>ProbeSet</b> | <b>Fold change</b> | <b>Symbol</b> | <b>Name</b>                                                                                            | <b>EntrezID</b> |
|----------------|-----------------|--------------------|---------------|--------------------------------------------------------------------------------------------------------|-----------------|
| 0.0078745      | 205565_s_at     | 1.26               | FXN           | Frataxin                                                                                               | 2395            |
| 0.0011354      | 202406_s_at     | 1.24               | TIAL1         | TIA1 cytotoxic granule-associated RNA binding protein-like 1                                           | 7073            |
| 0.0028112      | 213115_at       | 1.24               | ATG4A         | ATG4 autophagy related 4 homolog A (S. Cerevisiae)                                                     | 115201          |
| 0.0037702      | 209520_s_at     | 1.24               | NCBP1         | Nuclear cap binding protein subunit 1, 80kda                                                           | 4686            |
| 0.0059049      | 207840_at       | 1.24               | CD160         | CD160 molecule                                                                                         | 11126           |
| 0.0060573      | 219715_s_at     | 1.24               | TDP1          | Tyrosyl-DNA phosphodiesterase 1                                                                        | 55775           |
| 0.0087684      | 203022_at       | 1.24               | RNASEH2A      | Ribonuclease H2, subunit A                                                                             | 10535           |
| 0.0004373      | 208959_s_at     | 1.23               | ERP44         | Endoplasmic reticulum protein 44                                                                       | 23071           |
| 0.0070072      | 200791_s_at     | 1.23               | IQGAP1        | IQ motif containing gtpase activating protein 1                                                        | 8826            |
| 0.000753       | 208642_s_at     | 1.22               | XRCC5         | X-ray repair complementing defective repair in Chinese hamster cells 5 (double-strand-break rejoining) | 7520            |
| 0.0074189      | 200871_s_at     | 1.22               | PSAP          | Prosaposin                                                                                             | 5660            |
| 0.0039868      | 200843_s_at     | 1.21               | EPRS          | Glutamyl-prolyl-trna synthetase                                                                        | 2058            |
| 0.0001117      | 218107_at       | 1.2                | WDR26         | WD repeat domain 26                                                                                    | 80232           |
| 0.000296       | 221449_s_at     | 1.2                | ITFG1         | Integrin alpha FG-GAP repeat containing 1                                                              | 81533           |
| 0.003726       | 218241_at       | 1.2                | GOLGA5        | Golgin A5                                                                                              | 9950            |
| 0.0074154      | 211963_s_at     | 1.18               | ARPC5         | Actin related protein 2/3 complex, subunit 5, 16kda                                                    | 10092           |
| 0.0047348      | 208644_at       | 1.16               | PARP1         | Poly (ADP-ribose) polymerase 1                                                                         | 142             |
| 0.0084054      | 200955_at       | 1.16               | IMMT          | Inner membrane protein, mitochondrial                                                                  | 10989           |
| 0.0060699      | 218304_s_at     | 1.15               | OSBPL11       | Oxysterol binding protein-like 11                                                                      | 114885          |
| 0.0082102      | 203635_at       | 1.15               | DSCR3         | Down syndrome critical region gene 3                                                                   | 10311           |
| 0.0039422      | 217513_at       | 1.14               | C17orf60      | Chromosome 17 open reading frame 60                                                                    | 284021          |
| 0.0039169      | 208845_at       | 0.9                | VDAC3         | Voltage-dependent anion channel 3                                                                      | 7419            |
| 0.0058803      | 200810_s_at     | 0.9                | CIRBP         | Cold inducible RNA binding protein                                                                     | 1153            |
| 0.0093298      | 202428_x_at     | 0.9                | DBI           | Diazepam binding inhibitor (GABA receptor modulator, acyl-coa binding protein)                         | 1622            |
| 0.0002846      | 211069_s_at     | 0.89               | SUMO1         | SMT3 suppressor of mif two 3 homolog 1 (S. Cerevisiae)                                                 | 7341            |
| 0.0057596      | 212547_at       | 0.89               | BRD3          | Bromodomain containing 3                                                                               | 8019            |
| 0.0072486      | 220121_at       | 0.89               | LINS1         | Lines homolog 1 (Drosophila)                                                                           | 55180           |
| 0.007348       | 213499_at       | 0.89               | CLCN2         | Chloride channel 2                                                                                     | 1181            |
| 0.0039193      | 201464_x_at     | 0.88               | JUN           | Jun proto-oncogene                                                                                     | 3725            |
| 0.0039275      | 208640_at       | 0.88               | RAC1          | Ras-related C3 botulinum toxin substrate 1 (rho family, small GTP binding protein Rac1)                | 5879            |
| 0.0053075      | 213588_x_at     | 0.88               | RPL14         | Ribosomal protein L14                                                                                  | 9045            |
| 0.0084812      | 208820_at       | 0.88               | PTK2          | PTK2 protein tyrosine kinase 2                                                                         | 5747            |
| 0.0010155      | 200763_s_at     | 0.87               | RPLP1         | Ribosomal protein, large, P1                                                                           | 6176            |
| 0.0016893      | 214394_x_at     | 0.87               | EEF1D         | Eukaryotic translation elongation factor 1 delta (guanine nucleotide exchange protein)                 | 1936            |
| 0.0023599      | 201891_s_at     | 0.87               | B2M           | Beta-2-microglobulin                                                                                   | 567             |

| <b>P value</b> | <b>ProbeSet</b> | <b>Fold change</b> | <b>Symbol</b> | <b>Name</b>                                                                               | <b>EntrezID</b> |
|----------------|-----------------|--------------------|---------------|-------------------------------------------------------------------------------------------|-----------------|
| 0.0024647      | 218253_s_at     | 0.87               | LGTN          | Ligatin                                                                                   | 1939            |
| 0.0046989      | 202215_s_at     | 0.87               | NFYC          | Nuclear transcription factor Y, gamma                                                     | 4802            |
| 0.0052599      | 200089_s_at     | 0.87               | RPL4          | Ribosomal protein L4                                                                      | 6124            |
| 0.0058994      | 212933_x_at     | 0.87               | RPL13         | Ribosomal protein L13                                                                     | 6137            |
| 0.0063349      | 200095_x_at     | 0.87               | RPS10         | Ribosomal protein S10                                                                     | 6204            |
| 0.0012828      | 210825_s_at     | 0.86               | PEBP1         | Phosphatidylethanolamine binding protein 1                                                | 5037            |
| 0.002736       | 200006_at       | 0.86               | PARK7         | Parkinson disease (autosomal recessive, early onset) 7                                    | 11315           |
| 0.0057939      | 212447_at       | 0.86               | KBTBD2        | Kelch repeat and BTB (POZ) domain containing 2                                            | 25948           |
| 0.0074443      | 200088_x_at     | 0.86               | RPL12         | Ribosomal protein L12                                                                     | 6136            |
| 0.0080104      | 212039_x_at     | 0.86               | RPL3          | Ribosomal protein L3                                                                      | 6122            |
| 0.0001717      | 217719_at       | 0.85               | EIF3L         | Eukaryotic translation initiation factor 3, subunit L                                     | 51386           |
| 0.0002582      | 213919_at       | 0.85               | DNAJC4        | Dnaj (Hsp40) homolog, subfamily C, member 4                                               | 3338            |
| 0.0009733      | 213377_x_at     | 0.85               | RPS12         | Ribosomal protein S12                                                                     | 6206            |
| 0.0010019      | 200016_x_at     | 0.85               | HNRNPA1       | Heterogeneous nuclear ribonucleoprotein A1                                                | 3178            |
| 0.0010824      | 201994_at       | 0.85               | MORF4L2       | Mortality factor 4 like 2                                                                 | 9643            |
| 0.0015608      | 200933_x_at     | 0.85               | RPS4X         | Ribosomal protein S4, X-linked                                                            | 6191            |
| 0.0016562      | 201049_s_at     | 0.85               | RPS18         | Ribosomal protein S18                                                                     | 6222            |
| 0.0023948      | 204386_s_at     | 0.85               | MRP63         | Mitochondrial ribosomal protein 63                                                        | 78988           |
| 0.0054637      | 213699_s_at     | 0.85               | YWHAQ         | Tyrosine 3-monooxygenase/tryptophan 5-monooxygenase activation protein, theta polypeptide | 10971           |
| 0.0065944      | 202560_s_at     | 0.85               | C1orf77       | Chromosome 1 open reading frame 77                                                        | 26097           |
| 0.006984       | 207783_x_at     | 0.85               | HUWE1         | HECT, UBA and WWE domain containing 1                                                     | 10075           |
| 0.0079157      | 208855_s_at     | 0.85               | STK24         | Serine/threonine kinase 24                                                                | 8428            |
| 0.0089401      | 209390_at       | 0.85               | TSC1          | Tuberous sclerosis 1                                                                      | 7248            |
| 0.0002644      | 213614_x_at     | 0.84               | EEF1A1        | Eukaryotic translation elongation factor 1 alpha 1                                        | 1915            |
| 0.0003623      | 200717_x_at     | 0.84               | RPL7          | Ribosomal protein L7                                                                      | 6129            |
| 0.0006361      | 200025_s_at     | 0.84               | RPL27         | Ribosomal protein L27                                                                     | 6155            |
| 0.001688       | 214143_x_at     | 0.84               | RPL24         | Ribosomal protein L24                                                                     | 6152            |
| 0.0040722      | 201254_x_at     | 0.84               | RPS6          | Ribosomal protein S6                                                                      | 6194            |
| 0.0049855      | 219169_s_at     | 0.84               | TFB1M         | Transcription factor B1, mitochondrial                                                    | 51106           |
| 0.0054849      | 200030_s_at     | 0.84               | SLC25A3       | Solute carrier family 25 (mitochondrial carrier; phosphate carrier), member 3             | 5250            |
| 0.0072153      | 214328_s_at     | 0.84               | HSP90AA1      | Heat shock protein 90kda alpha (cytosolic), class A member 1                              | 3320            |
| 0.0085271      | 823_at          | 0.84               | CX3CL1        | Chemokine (C-X3-C motif) ligand 1                                                         | 6376            |
| 0.0090938      | 202622_s_at     | 0.84               | ATXN2         | Ataxin 2                                                                                  | 6311            |
| 0.0093643      | 216085_at       | 0.84               | DKFZP434C153  | DKFZP434C153 protein                                                                      | 26105           |
| 5.55E-05       | 213881_x_at     | 0.83               | SUMO2         | SMT3 suppressor of mif two 3 homolog 2 ( <i>S. Cerevisiae</i> )                           | 6613            |
| 7.17E-05       | 217982_s_at     | 0.83               | MORF4L1       | Mortality factor 4 like 1                                                                 | 10933           |

| <b>P value</b> | <b>ProbeSet</b> | <b>Fold change</b> | <b>Symbol</b> | <b>Name</b>                                                                                               | <b>EntrezID</b> |
|----------------|-----------------|--------------------|---------------|-----------------------------------------------------------------------------------------------------------|-----------------|
| 0.0017377      | 212284_x_at     | 0.83               | TPT1          | Tumor protein, translationally-controlled 1                                                               | 7178            |
| 0.0017724      | 213084_x_at     | 0.83               | RPL23A        | Ribosomal protein l23a                                                                                    | 6147            |
| 0.0021247      | 200718_s_at     | 0.83               | SKP1          | S-phase kinase-associated protein 1                                                                       | 6500            |
| 0.0024387      | 204957_at       | 0.83               | ORC5L         | Origin recognition complex, subunit 5-like (yeast)                                                        | 5001            |
| 0.003192       | 218356_at       | 0.83               | FTSJ2         | Ftsj homolog 2 (E. Coli)                                                                                  | 29960           |
| 0.0036386      | 221474_at       | 0.83               | MYL12B        | Myosin, light chain 12B, regulatory                                                                       | 103910          |
| 0.0037231      | 213151_s_at     | 0.83               | SEPT7         | Septin 7                                                                                                  | 989             |
| 0.003725       | 212973_at       | 0.83               | RPIA          | Ribose 5-phosphate isomerase A                                                                            | 22934           |
| 0.0038234      | 221681_s_at     | 0.83               | DSPP          | Dentin sialophosphoprotein                                                                                | 1834            |
| 0.004082       | 207160_at       | 0.83               | IL12A         | Interleukin 12A (natural killer cell stimulatory factor 1, cytotoxic lymphocyte maturation factor 1, p35) | 3592            |
| 0.0045749      | 202231_at       | 0.83               | EIF3M         | Eukaryotic translation initiation factor 3, subunit M                                                     | 10480           |
| 0.0046507      | 200674_s_at     | 0.83               | RPL32         | Ribosomal protein L32                                                                                     | 6161            |
| 0.0054168      | 204098_at       | 0.83               | RBMX2         | RNA binding motif protein, X-linked 2                                                                     | 51634           |
| 0.0056921      | 201160_s_at     | 0.83               | CSDA          | Cold shock domain protein A                                                                               | 8531            |
| 0.0057698      | 40446_at        | 0.83               | PHF1          | PHD finger protein 1                                                                                      | 5252            |
| 0.0067879      | 201934_at       | 0.83               | WDR82         | WD repeat domain 82                                                                                       | 80335           |
| 0.0074042      | 204733_at       | 0.83               | KLK6          | Kallikrein-related peptidase 6                                                                            | 5653            |
| 0.0003078      | 221476_s_at     | 0.82               | RPL15         | Ribosomal protein L15                                                                                     | 6138            |
| 0.0010243      | 213941_x_at     | 0.82               | RPS7          | Ribosomal protein S7                                                                                      | 6201            |
| 0.0011455      | 208695_s_at     | 0.82               | RPL39         | Ribosomal protein L39                                                                                     | 6170            |
| 0.0013067      | 200741_s_at     | 0.82               | RPS27         | Ribosomal protein S27                                                                                     | 6232            |
| 0.0027417      | 200858_s_at     | 0.82               | RPS8          | Ribosomal protein S8                                                                                      | 6202            |
| 0.0045733      | 204618_s_at     | 0.82               | GABPB1        | GA binding protein transcription factor, beta subunit 1                                                   | 2553            |
| 0.0047302      | 200037_s_at     | 0.82               | CBX3          | Chromobox homolog 3                                                                                       | 11335           |
| 0.0061305      | 213034_at       | 0.82               | SIK3          | SIK family kinase 3                                                                                       | 23387           |
| 0.006631       | 208718_at       | 0.82               | DDX17         | DEAD (Asp-Glu-Ala-Asp) box polypeptide 17                                                                 | 10521           |
| 0.0099934      | 221954_at       | 0.82               | C20orf111     | Chromosome 20 open reading frame 111                                                                      | 51526           |
| 0.0003024      | 201031_s_at     | 0.81               | HNRNPH1       | Heterogeneous nuclear ribonucleoprotein H1 (H)                                                            | 3187            |
| 0.0009621      | 203667_at       | 0.81               | TBCA          | Tubulin folding cofactor A                                                                                | 6902            |
| 0.0010809      | 204700_x_at     | 0.81               | C1orf107      | Chromosome 1 open reading frame 107                                                                       | 27042           |
| 0.0013865      | 201134_x_at     | 0.81               | COX7C         | Cytochrome c oxidase subunit viic                                                                         | 1350            |
| 0.0014404      | 200018_at       | 0.81               | RPS13         | Ribosomal protein S13                                                                                     | 6207            |
| 0.0018418      | 213130_at       | 0.81               | ZNF473        | Zinc finger protein 473                                                                                   | 25888           |
| 0.0048492      | 201257_x_at     | 0.81               | RPS3A         | Ribosomal protein S3A                                                                                     | 6189            |
| 0.0048788      | 201877_s_at     | 0.81               | PPP2R5C       | Protein phosphatase 2, regulatory subunit B', gamma                                                       | 5527            |
| 0.0070129      | 217731_s_at     | 0.81               | ITM2B         | Integral membrane protein 2B                                                                              | 9445            |
| 0.007184       | 201658_at       | 0.81               | ARL1          | ADP-ribosylation factor-like 1                                                                            | 400             |
| 0.0074606      | 213848_at       | 0.81               | DUSP7         | Dual specificity phosphatase 7                                                                            | 1849            |

| <b>P value</b> | <b>ProbeSet</b> | <b>Fold change</b> | <b>Symbol</b> | <b>Name</b>                                                  | <b>EntrezID</b> |
|----------------|-----------------|--------------------|---------------|--------------------------------------------------------------|-----------------|
| 0.007915       | 208647_at       | 0.81               | FDFT1         | Farnesyl-diphosphatefarnesyltransferase 1                    | 2222            |
| 0.0088766      | 212126_at       | 0.81               | CBX5          | Chromobox homolog 5                                          | 23468           |
| 0.0002564      | 212077_at       | 0.8                | CALD1         | Caldesmon 1                                                  | 800             |
| 0.0004107      | 206896_s_at     | 0.8                | GNG7          | Guanine nucleotide binding protein (G protein), gamma 7      | 2788            |
| 0.0009532      | 215096_s_at     | 0.8                | ESD           | Esterase D                                                   | 2098            |
| 0.0011697      | 200963_x_at     | 0.8                | RPL31         | Ribosomal protein L31                                        | 6160            |
| 0.0013017      | 213313_at       | 0.8                | RABGAP1       | RAB gtpase activating protein 1                              | 23637           |
| 0.0014667      | 217740_x_at     | 0.8                | RPL7A         | Ribosomal protein l7a                                        | 6130            |
| 0.0015369      | 211946_s_at     | 0.8                | BAT2L2        | HLA-B associated transcript 2-like 2                         | 23215           |
| 0.00245        | 201166_s_at     | 0.8                | PUM1          | Pumilio homolog 1 (Drosophila)                               | 9698            |
| 0.0032341      | 217927_at       | 0.8                | SPCS1         | Signal peptidase complex subunit 1 homolog (S. Cerevisiae)   | 28972           |
| 0.0046739      | 209944_at       | 0.8                | ZNF410        | Zinc finger protein 410                                      | 57862           |
| 0.0051781      | 32091_at        | 0.8                | SLC25A44      | Solute carrier family 25, member 44                          | 9673            |
| 0.0055209      | 200926_at       | 0.8                | RPS23         | Ribosomal protein S23                                        | 6228            |
| 0.0078868      | 208826_x_at     | 0.8                | HINT1         | Histidine triad nucleotide binding protein 1                 | 3094            |
| 0.0001254      | 200043_at       | 0.79               | ERH           | Enhancer of rudimentary homolog (Drosophila)                 | 2079            |
| 0.0001735      | 200063_s_at     | 0.79               | NPM1          | Nucleophosmin (nucleolarphosphoprotein B23, numatrin)        | 4869            |
| 0.0002869      | 200062_s_at     | 0.79               | RPL30         | Ribosomal protein L30                                        | 6156            |
| 0.0003208      | 212578_x_at     | 0.79               | RPS17         | Ribosomal protein S17                                        | 6218            |
| 0.0003997      | 202443_x_at     | 0.79               | NOTCH2        | Notch 2                                                      | 4853            |
| 0.0014688      | 218527_at       | 0.79               | APTX          | Aprataxin                                                    | 54840           |
| 0.002131       | 202029_x_at     | 0.79               | RPL38         | Ribosomal protein L38                                        | 6169            |
| 0.0026755      | 216347_s_at     | 0.79               | PPP1R13B      | Protein phosphatase 1, regulatory (inhibitor) subunit 13B    | 23368           |
| 0.0034853      | 205256_at       | 0.79               | ZBTB39        | Zinc finger and BTB domain containing 39                     | 9880            |
| 0.0067828      | 213035_at       | 0.79               | ANKRD28       | Ankyrin repeat domain 28                                     | 23243           |
| 0.0070522      | 218648_at       | 0.79               | CRTC3         | CREB regulated transcription coactivator 3                   | 64784           |
| 0.0086646      | 213188_s_at     | 0.79               | MINA          | MYC induced nuclear antigen                                  | 84864           |
| 0.0095233      | 216215_s_at     | 0.79               | RBM9          | RNA binding motif protein 9                                  | 23543           |
| 0.0096224      | 217724_at       | 0.79               | SERBP1        | SERPINE1 mrna binding protein 1                              | 26135           |
| 0.0002505      | 200873_s_at     | 0.78               | CCT8          | Chaperonin containing TCP1, subunit 8 (theta)                | 10694           |
| 0.0008986      | 204514_at       | 0.78               | DPH2          | DPH2 homolog (S. Cerevisiae)                                 | 1802            |
| 0.001181       | 200032_s_at     | 0.78               | RPL9          | Ribosomal protein L9                                         | 6133            |
| 0.0017611      | 203735_x_at     | 0.78               | PPFIBP1       | PTPRF interacting protein, binding protein 1 (liprin beta 1) | 8496            |
| 0.001923       | 213198_at       | 0.78               | ACVR1B        | Activin A receptor, type IB                                  | 91              |
| 0.0020964      | 208672_s_at     | 0.78               | SRSF3         | Serine/arginine-rich splicing factor 3                       | 6428            |
| 0.0024089      | 200735_x_at     | 0.78               | NACA          | Nascent polypeptide-associated complex alpha subunit         | 4666            |
| 0.0031904      | 201987_at       | 0.78               | MED13         | Mediator complex subunit 13                                  | 9969            |
| 0.0034955      | 201928_at       | 0.78               | PKP4          | Plakophilin 4                                                | 8502            |

| <b>P value</b> | <b>ProbeSet</b> | <b>Fold change</b> | <b>Symbol</b> | <b>Name</b>                                                                                                      | <b>EntrezID</b> |
|----------------|-----------------|--------------------|---------------|------------------------------------------------------------------------------------------------------------------|-----------------|
| 0.0040364      | 208407_s_at     | 0.78               | CTNND1        | Catenin (cadherin-associated protein), delta 1                                                                   | 1500            |
| 0.0047445      | 200061_s_at     | 0.78               | RPS24         | Ribosomal protein S24                                                                                            | 6229            |
| 0.0053089      | 47571_at        | 0.78               | ZNF236        | Zinc finger protein 236                                                                                          | 7776            |
| 0.008852       | 213861_s_at     | 0.78               | FAM119B       | Family with sequence similarity 119, member B                                                                    | 25895           |
| 0.0002273      | 200602_at       | 0.77               | APP           | Amyloid beta (A4) precursor protein                                                                              | 351             |
| 0.0002796      | 203117_s_at     | 0.77               | PAN2          | PAN2 poly(A) specific ribonuclease subunit homolog (S. Cerevisiae)                                               | 9924            |
| 0.0007175      | 210986_s_at     | 0.77               | TPM1          | Tropomyosin 1 (alpha)                                                                                            | 7168            |
| 0.0008222      | 202097_at       | 0.77               | NUP153        | Nucleoporin 153kda                                                                                               | 9972            |
| 0.0010082      | 211938_at       | 0.77               | EIF4B         | Eukaryotic translation initiation factor 4B                                                                      | 1975            |
| 0.0021497      | 202277_at       | 0.77               | SPTLC1        | Serine palmitoyltransferase, long chain base subunit 1                                                           | 10558           |
| 0.0028606      | 203420_at       | 0.77               | FAM8A1        | Family with sequence similarity 8, member A1                                                                     | 51439           |
| 0.0029588      | 202515_at       | 0.77               | DLG1          | Discs, large homolog 1 (Drosophila)                                                                              | 1739            |
| 0.0031849      | 38892_at        | 0.77               | KIAA0240      | Kiaa0240                                                                                                         | 23506           |
| 0.0032719      | 218920_at       | 0.77               | FAM193B       | Family with sequence similarity 193, member B                                                                    | 54540           |
| 0.0050372      | 200036_s_at     | 0.77               | RPL10A        | Ribosomal protein l10a                                                                                           | 4736            |
| 0.0054016      | 211784_s_at     | 0.77               | SRSF1         | Serine/arginine-rich splicing factor 1                                                                           | 6426            |
| 0.0062417      | 219383_at       | 0.77               | PRR5L         | Proline rich 5 like                                                                                              | 79899           |
| 0.0001576      | 202981_x_at     | 0.76               | SIAH1         | Seven in absentia homolog 1 (Drosophila)                                                                         | 6477            |
| 0.0007738      | 218403_at       | 0.76               | TRIAP1        | TP53 regulated inhibitor of apoptosis 1                                                                          | 51499           |
| 0.0007811      | 206323_x_at     | 0.76               | OPHN1         | Oligophrenin 1                                                                                                   | 4983            |
| 0.0014417      | 37462_i_at      | 0.76               | SF3A2         | Splicing factor 3a, subunit 2, 66kda                                                                             | 8175            |
| 0.0019031      | 201984_s_at     | 0.76               | EGFR          | Epidermal growth factor receptor                                                                                 | 1956            |
| 0.002018       | 209694_at       | 0.76               | PTS           | 6-pyruvoyltetrahydropterin synthase                                                                              | 5805            |
| 0.0020657      | 206158_s_at     | 0.76               | CNBP          | CCHC-type zinc finger, nucleic acid binding protein                                                              | 7555            |
| 0.0026831      | 213278_at       | 0.76               | MTMR9         | Myotubularin related protein 9                                                                                   | 66036           |
| 0.0027902      | 46665_at        | 0.76               | SEMA4C        | Sema domain, immunoglobulin domain (Ig), transmembrane domain (TM) and short cytoplasmic domain, (semaphorin) 4C | 54910           |
| 0.0036237      | 218085_at       | 0.76               | CHMP5         | Chromatin modifying protein 5                                                                                    | 51510           |
| 0.0053311      | 200012_x_at     | 0.76               | RPL21         | Ribosomal protein L21                                                                                            | 6144            |
| 0.0057449      | 206816_s_at     | 0.76               | SPAG8         | Sperm associated antigen 8                                                                                       | 26206           |
| 0.0067129      | 218467_at       | 0.76               | PSMG2         | Proteasome (prosome, macropain) assembly chaperone 2                                                             | 56984           |
| 0.007301       | 210169_at       | 0.76               | SEC14L5       | SEC14-like 5 (S. Cerevisiae)                                                                                     | 9717            |
| 0.0091998      | 203080_s_at     | 0.76               | BAZ2B         | Bromodomain adjacent to zinc finger domain, 2B                                                                   | 29994           |
| 0.0098597      | 202933_s_at     | 0.76               | YES1          | V-yes-1 Yamaguchi sarcoma viral oncogene homolog 1                                                               | 7525            |
| 0.0003867      | 200799_at       | 0.75               | HSPA1A        | Heat shock 70kda protein 1A                                                                                      | 3303            |
| 0.0004524      | 204370_at       | 0.75               | CLP1          | CLP1, cleavage and polyadenylation factor I subunit, homolog (S. Cerevisiae)                                     | 10978           |



| <b>P value</b> | <b>ProbeSet</b> | <b>Fold change</b> | <b>Symbol</b> | <b>Name</b>                                                       | <b>EntrezID</b> |
|----------------|-----------------|--------------------|---------------|-------------------------------------------------------------------|-----------------|
| 0.0016459      | 208697_s_at     | 0.75               | EIF3E         | Eukaryotic translation initiation factor 3, subunit E             | 3646            |
| 0.0023693      | 220159_at       | 0.75               | ABCA11P       | ATP-binding cassette, sub-family A (ABC1), member 11 (pseudogene) | 79963           |
| 0.0034094      | 202265_at       | 0.75               | BMI1          | BMI1 polycomb ring finger oncogene                                | 648             |
| 0.0040193      | 203848_at       | 0.75               | AKAP8         | A kinase (PRKA) anchor protein 8                                  | 10270           |
| 0.0049106      | 217988_at       | 0.75               | CCNB1IP1      | Cyclin B1 interacting protein 1                                   | 57820           |
| 0.0055924      | 213218_at       | 0.75               | ZNF187        | Zinc finger protein 187                                           | 7741            |
| 0.0071283      | 218171_at       | 0.75               | VPS4B         | Vacuolar protein sorting 4 homolog B (S. Cerevisiae)              | 9525            |
| 0.0046022      | 209993_at       | 0.74               | ABCB1         | ATP-binding cassette, sub-family B (MDR/TAP), member 1            | 5243            |
| 0.0065423      | 203250_at       | 0.74               | RBM16         | RNA binding motif protein 16                                      | 22828           |
| 0.0083826      | 203484_at       | 0.74               | SEC61G        | Sec61 gamma subunit                                               | 23480           |
| 0.0085611      | 201997_s_at     | 0.74               | SPEN          | Spen homolog, transcriptional regulator (Drosophila)              | 23013           |
| 0.0013425      | 214123_s_at     | 0.73               | C4orf10       | Chromosome 4 open reading frame 10                                | 317648          |
| 0.0014229      | 217408_at       | 0.73               | MRPS18B       | Mitochondrial ribosomal protein S18B                              | 28973           |
| 0.0016826      | 213390_at       | 0.73               | ZC3H4         | Zinc finger CCCH-type containing 4                                | 23211           |
| 0.0019191      | 218849_s_at     | 0.73               | PPP1R13L      | Protein phosphatase 1, regulatory (inhibitor) subunit 13 like     | 10848           |
| 0.0024428      | 219531_at       | 0.73               | CEP72         | Centrosomal protein 72kda                                         | 55722           |
| 0.0025609      | 209679_s_at     | 0.73               | SMAGP         | Small cell adhesion glycoprotein                                  | 57228           |
| 0.0038558      | 218823_s_at     | 0.73               | KCTD9         | Potassium channel tetramerisation domain containing 9             | 54793           |
| 0.0045613      | 202842_s_at     | 0.73               | DNAJB9        | Dnaj (Hsp40) homolog, subfamily B, member 9                       | 4189            |
| 0.0056846      | 217551_at       | 0.73               | OR7E14P       | Olfactory receptor, family 7, subfamily E, member 14 pseudogene   | 10819           |
| 0.0057862      | 220225_at       | 0.73               | IRX4          | Iroquoishomeobox 4                                                | 50805           |
| 0.0076289      | 218851_s_at     | 0.73               | WDR33         | WD repeat domain 33                                               | 55339           |
| 0.0076987      | 204367_at       | 0.73               | SP2           | Sp2 transcription factor                                          | 6668            |
| 0.0087533      | 219961_s_at     | 0.73               | PLK1S1        | Polo-like kinase 1 substrate 1                                    | 55857           |
| 0.0097114      | 202088_at       | 0.73               | SLC39A6       | Solute carrier family 39 (zinc transporter), member 6             | 25800           |
| 0.0006018      | 65718_at        | 0.72               | GPR124        | G protein-coupled receptor 124                                    | 25960           |
| 0.0010742      | 219538_at       | 0.72               | WDR5B         | WD repeat domain 5B                                               | 54554           |
| 0.0013007      | 214662_at       | 0.72               | WDR43         | WD repeat domain 43                                               | 23160           |
| 0.0023213      | 212505_s_at     | 0.72               | KIAA0892      | Kiaa0892                                                          | 23383           |
| 0.0041917      | 204071_s_at     | 0.72               | TOPORS        | Topoisomerase I binding, arginine/serine-rich                     | 10210           |
| 0.0054669      | 200944_s_at     | 0.72               | HMGN1         | High-mobility group nucleosome binding domain 1                   | 3150            |
| 0.0069101      | 213743_at       | 0.72               | CCNT2         | Cyclin T2                                                         | 905             |
| 0.0082565      | 215111_s_at     | 0.72               | TSC22D1       | TSC22 domain family, member 1                                     | 8848            |
| 0.0088464      | 211406_at       | 0.72               | IER3IP1       | Immediate early response 3 interacting protein 1                  | 51124           |
| 0.0092946      | 218769_s_at     | 0.72               | ANKRA2        | Ankyrin repeat, family A (RFXANK-like), 2                         | 57763           |
| 0.0093235      | 204605_at       | 0.72               | CGRRF1        | Cell growth regulator with ring finger domain 1                   | 10668           |

| <b>P value</b> | <b>ProbeSet</b> | <b>Fold change</b> | <b>Symbol</b> | <b>Name</b>                                                                                       | <b>EntrezID</b> |
|----------------|-----------------|--------------------|---------------|---------------------------------------------------------------------------------------------------|-----------------|
| 0.0097725      | 213410_at       | 0.72               | C10orf137     | Chromosome 10 open reading frame 137                                                              | 26098           |
| 0.0003001      | 212838_at       | 0.71               | DNMBP         | Dynamin binding protein                                                                           | 23268           |
| 0.0003678      | 217833_at       | 0.71               | SYNCRIP       | Synaptotagmin binding, cytoplasmic RNA interacting protein                                        | 10492           |
| 0.0004685      | 209139_s_at     | 0.71               | PRKRA         | Protein kinase, interferon-inducible double stranded RNA dependent activator                      | 8575            |
| 0.0020427      | 212719_at       | 0.71               | PHLPP1        | PH domain and leucine rich repeat protein phosphatase 1                                           | 23239           |
| 0.0023832      | 202011_at       | 0.71               | TJP1          | Tight junction protein 1 (zonaoccludens 1)                                                        | 7082            |
| 0.004428       | 216348_at       | 0.71               | RPS17P5       | Ribosomal protein S17 pseudogene 5                                                                | 442216          |
| 0.005012       | 203478_at       | 0.71               | NDUFC1        | NADH dehydrogenase (ubiquinone) 1, subcomplex unknown, 1, 6kda                                    | 4717            |
| 0.0052152      | 201406_at       | 0.71               | RPL36A        | Ribosomal protein l36a                                                                            | 6173            |
| 0.0062452      | 201746_at       | 0.71               | TP53          | Tumor protein p53                                                                                 | 7157            |
| 0.0073566      | 218611_at       | 0.71               | IER5          | Immediate early response 5                                                                        | 51278           |
| 0.0084699      | 215321_at       | 0.71               | RUNDC3B       | RUN domain containing 3B                                                                          | 154661          |
| 0.0087999      | 202220_at       | 0.71               | KIAA0907      | Kiaa0907                                                                                          | 22889           |
| 0.0097571      | 212230_at       | 0.71               | PPAP2B        | Phosphatidic acid phosphatase type 2B                                                             | 8613            |
| 0.0003321      | 201334_s_at     | 0.7                | ARHGEF12      | Rho guanine nucleotide exchange factor (GEF) 12                                                   | 23365           |
| 0.000518       | 201919_at       | 0.7                | SLC25A36      | Solute carrier family 25, member 36                                                               | 55186           |
| 0.0008968      | 218005_at       | 0.7                | ZNF22         | Zinc finger protein 22 (KOX 15)                                                                   | 7570            |
| 0.0009544      | 205136_s_at     | 0.7                | NUFIP1        | Nuclear fragile X mental retardation protein interacting protein 1                                | 26747           |
| 0.0013327      | 200595_s_at     | 0.7                | EIF3A         | Eukaryotic translation initiation factor 3, subunit A                                             | 8661            |
| 0.0026123      | 206648_at       | 0.7                | ZNF571        | Zinc finger protein 571                                                                           | 51276           |
| 0.0026576      | 209409_at       | 0.7                | GRB10         | Growth factor receptor-bound protein 10                                                           | 2887            |
| 0.0029668      | 218643_s_at     | 0.7                | CRIPT         | Cysteine-rich PDZ-binding protein                                                                 | 9419            |
| 0.0048366      | 208882_s_at     | 0.7                | UBR5          | Ubiquitin protein ligase E3 component n-recogin 5                                                 | 51366           |
| 0.0086873      | 204808_s_at     | 0.7                | TMEM5         | Transmembrane protein 5                                                                           | 10329           |
| 2.43E-05       | 209702_at       | 0.69               | FTO           | Fat mass and obesity associated                                                                   | 79068           |
| 0.0004047      | 213392_at       | 0.69               | IQCK          | IQ motif containing K                                                                             | 124152          |
| 0.0005732      | 218471_s_at     | 0.69               | BBS1          | Bardet-Biedl syndrome 1                                                                           | 582             |
| 0.0011557      | 212928_at       | 0.69               | TSPYL4        | TSPY-like 4                                                                                       | 23270           |
| 0.0041736      | 201957_at       | 0.69               | PPP1R12B      | Protein phosphatase 1, regulatory (inhibitor) subunit 12B                                         | 4660            |
| 0.0041737      | 219291_at       | 0.69               | DTWD1         | DTW domain containing 1                                                                           | 56986           |
| 0.0051204      | 204694_at       | 0.69               | AFP           | Alpha-fetoprotein                                                                                 | 174             |
| 0.0052657      | 205928_at       | 0.69               | ZNF443        | Zinc finger protein 443                                                                           | 10224           |
| 0.0053905      | 202749_at       | 0.69               | WRB           | Tryptophan rich basic protein                                                                     | 7485            |
| 0.0096295      | 213322_at       | 0.69               | C6orf130      | Chromosome 6 open reading frame 130                                                               | 221443          |
| 0.0005677      | 221230_s_at     | 0.68               | ARID4B        | AT rich interactive domain 4B (RBP1-like)                                                         | 51742           |
| 0.0018668      | 211988_at       | 0.68               | SMARCE1       | SWI/SNF related, matrix associated, actin dependent regulator of chromatin, subfamily e, member 1 | 6605            |

| <b>P value</b> | <b>ProbeSet</b> | <b>Fold change</b> | <b>Symbol</b> | <b>Name</b>                                                                  | <b>EntrezID</b> |
|----------------|-----------------|--------------------|---------------|------------------------------------------------------------------------------|-----------------|
| 0.0019765      | 201121_s_at     | 0.68               | PGRMC1        | Progesterone receptor membrane component 1                                   | 10857           |
| 0.0027947      | 209153_s_at     | 0.68               | TCF3          | Transcription factor 3 (E2A immunoglobulin enhancer binding factors E12/E47) | 6929            |
| 0.0045668      | 201084_s_at     | 0.68               | BCLAF1        | BCL2-associated transcription factor 1                                       | 9774            |
| 0.0068972      | 203552_at       | 0.68               | MAP4K5        | Mitogen-activated protein kinase kinase kinase 5                             | 11183           |
| 0.0075305      | 219936_s_at     | 0.68               | GPR87         | G protein-coupled receptor 87                                                | 53836           |
| 0.0077666      | 221931_s_at     | 0.68               | SEH1L         | SEH1-like (S. Cerevisiae)                                                    | 81929           |
| 0.00886        | 212673_at       | 0.68               | METAP1        | Methionylaminopeptidase 1                                                    | 23173           |
| 0.0088762      | 208838_at       | 0.68               | CAND1         | Cullin-associated and neddylation-dissociated 1                              | 55832           |
| 3.77E-05       | 212412_at       | 0.67               | PDLIM5        | PDZ and LIM domain 5                                                         | 10611           |
| 0.0008588      | 208655_at       | 0.67               | CCNI          | Cyclin I                                                                     | 10983           |
| 0.001084       | 200937_s_at     | 0.67               | RPL5          | Ribosomal protein L5                                                         | 6125            |
| 0.0012799      | 201578_at       | 0.67               | PODXL         | Podocalyxin-like                                                             | 5420            |
| 0.0053207      | 208398_s_at     | 0.67               | TBPL1         | TBP-like 1                                                                   | 9519            |
| 0.0053453      | 219338_s_at     | 0.67               | LRRC49        | Leucine rich repeat containing 49                                            | 54839           |
| 0.0062866      | 213578_at       | 0.67               | BMPR1A        | Bone morphogenetic protein receptor, type IA                                 | 657             |
| 0.0064949      | 220350_at       | 0.67               | ZNF235        | Zinc finger protein 235                                                      | 9310            |
| 0.0079808      | 202372_at       | 0.67               | RAB3GAP2      | RAB3 gtpase activating protein subunit 2 (non-catalytic)                     | 25782           |
| 0.0091343      | 202364_at       | 0.67               | MXI1          | MAX interactor 1                                                             | 4601            |
| 4.40E-05       | 205497_at       | 0.66               | ZNF175        | Zinc finger protein 175                                                      | 7728            |
| 0.0002361      | 217915_s_at     | 0.66               | RSL24D1       | Ribosomal L24 domain containing 1                                            | 51187           |
| 0.0002532      | 212204_at       | 0.66               | TMEM87A       | Transmembrane protein 87A                                                    | 25963           |
| 0.0007593      | 205080_at       | 0.66               | RARB          | Retinoic acid receptor, beta                                                 | 5915            |
| 0.0010822      | 209386_at       | 0.66               | TM4SF1        | Transmembrane 4 L six family member 1                                        | 4071            |
| 0.0015393      | 204547_at       | 0.66               | RAB40B        | RAB40B, member RAS oncogene family                                           | 10966           |
| 0.0028324      | 201015_s_at     | 0.66               | JUP           | Junction plakoglobin                                                         | 3728            |
| 0.0035921      | 203786_s_at     | 0.66               | TPD52L1       | Tumor protein D52-like 1                                                     | 7164            |
| 0.0038831      | 213287_s_at     | 0.66               | KRT10         | Keratin 10                                                                   | 3858            |
| 0.0039513      | 202769_at       | 0.66               | CCNG2         | Cyclin G2                                                                    | 901             |
| 0.0039776      | 213310_at       | 0.66               | EIF2C2        | Eukaryotic translation initiation factor 2C, 2                               | 27161           |
| 0.0052764      | 212850_s_at     | 0.66               | LRP4          | Low density lipoprotein receptor-related protein 4                           | 4038            |
| 0.0073259      | 222279_at       | 0.66               | LOC285830     | Hypothetical LOC285830                                                       | 285830          |
| 0.0096905      | 213750_at       | 0.66               | RSL1D1        | Ribosomal L1 domain containing 1                                             | 26156           |
| 0.0097622      | 205259_at       | 0.66               | NR3C2         | Nuclear receptor subfamily 3, group C, member 2                              | 4306            |
| 0.0011234      | 202193_at       | 0.65               | LIMK2         | LIM domain kinase 2                                                          | 3985            |
| 0.0012007      | 204847_at       | 0.65               | ZBTB11        | Zinc finger and BTB domain containing 11                                     | 27107           |
| 0.0021289      | 203556_at       | 0.65               | ZHX2          | Zinc fingers and homeoboxes 2                                                | 22882           |
| 0.0021593      | 203316_s_at     | 0.65               | SNRPE         | Small nuclear ribonucleoproteinpolypeptide E                                 | 6635            |

| <b>P value</b> | <b>ProbeSet</b> | <b>Fold change</b> | <b>Symbol</b> | <b>Name</b>                                                        | <b>EntrezID</b> |
|----------------|-----------------|--------------------|---------------|--------------------------------------------------------------------|-----------------|
| 0.0022136      | 220184_at       | 0.65               | NANOG         | Nanoghomeobox                                                      | 79923           |
| 0.0022319      | 222304_x_at     | 0.65               | OR7E47P       | Olfactory receptor, family 7, subfamily E, member 47 pseudogene    | 26628           |
| 0.0036354      | 202565_s_at     | 0.65               | SVIL          | Supervillin                                                        | 6840            |
| 0.004721       | 204754_at       | 0.65               | HLF           | Hepatic leukemia factor                                            | 3131            |
| 0.0082662      | 209909_s_at     | 0.65               | TGFB2         | Transforming growth factor, beta 2                                 | 7042            |
| 0.0089778      | 211033_s_at     | 0.65               | PEX7          | Peroxisomal biogenesis factor 7                                    | 5191            |
| 0.0012298      | 219564_at       | 0.64               | KCNJ16        | Potassium inwardly-rectifying channel, subfamily J, member 16      | 3773            |
| 0.0012765      | 214281_s_at     | 0.64               | RCHY1         | Ring finger and CHY zinc finger domain containing 1                | 25898           |
| 0.0027983      | 215596_s_at     | 0.64               | RNF160        | Ring finger protein 160                                            | 26046           |
| 0.0065492      | 207717_s_at     | 0.64               | PKP2          | Plakophilin 2                                                      | 5318            |
| 0.0067774      | 212239_at       | 0.64               | PIK3R1        | Phosphoinositide-3-kinase, regulatory subunit 1 (alpha)            | 5295            |
| 0.00787        | 204871_at       | 0.64               | MTERF         | Mitochondrial transcription termination factor                     | 7978            |
| 0.0082775      | 203951_at       | 0.64               | CNN1          | Calponin 1, basic, smooth muscle                                   | 1264            |
| 0.0002085      | 217936_at       | 0.63               | ARHGAP5       | Rho gtpase activating protein 5                                    | 394             |
| 0.0003257      | 221775_x_at     | 0.63               | RPL22         | Ribosomal protein L22                                              | 6146            |
| 0.0022332      | 219177_at       | 0.63               | BRX1          | BRX1, biogenesis of ribosomes, homolog (S. Cerevisiae)             | 55299           |
| 0.0028196      | 208760_at       | 0.63               | UBE2I         | Ubiquitin-conjugating enzyme E2I (UBC9 homolog, yeast)             | 7329            |
| 0.0041096      | 221193_s_at     | 0.63               | ZCCHC10       | Zinc finger, CCHC domain containing 10                             | 54819           |
| 0.0045331      | 213280_at       | 0.63               | RAP1GAP2      | RAP1 gtpase activating protein 2                                   | 23108           |
| 0.0062823      | 220150_s_at     | 0.63               | FAM184A       | Family with sequence similarity 184, member A                      | 79632           |
| 0.0073061      | 202541_at       | 0.63               | AIMP1         | Aminoacyltransferase complex-interacting multifunctional protein 1 | 9255            |
| 0.0082983      | 204199_at       | 0.63               | RALGPS1       | Ral GEF with PH domain and SH3 binding motif 1                     | 9649            |
| 0.0001834      | 220324_at       | 0.62               | C6orf155      | Chromosome 6 open reading frame 155                                | 79940           |
| 0.0003504      | 213687_s_at     | 0.62               | RPL35A        | Ribosomal protein l35a                                             | 6165            |
| 0.0007606      | 213701_at       | 0.62               | C12orf29      | Chromosome 12 open reading frame 29                                | 91298           |
| 0.0007915      | 205791_x_at     | 0.62               | ZNF230        | Zinc finger protein 230                                            | 7773            |
| 0.00089        | 218712_at       | 0.62               | C1orf109      | Chromosome 1 open reading frame 109                                | 54955           |
| 0.0039261      | 201117_s_at     | 0.62               | CPE           | Carboxypeptidase E                                                 | 1363            |
| 0.0049981      | 222237_s_at     | 0.62               | ZFP112        | Zinc finger protein 112 homolog (mouse)                            | 7771            |
| 0.0070422      | 218846_at       | 0.62               | MED23         | Mediator complex subunit 23                                        | 9439            |
| 0.0098464      | 209791_at       | 0.62               | PADI2         | Peptidyl arginine deiminase, type II                               | 11240           |
| 0.0099275      | 220770_s_at     | 0.62               | C5orf54       | Chromosome 5 open reading frame 54                                 | 63920           |
| 8.83E-05       | 203407_at       | 0.61               | PPL           | Periplakin                                                         | 5493            |
| 0.0011343      | 219515_at       | 0.61               | PRDM10        | PR domain containing 10                                            | 56980           |
| 0.001841       | 219123_at       | 0.61               | ZNF232        | Zinc finger protein 232                                            | 7775            |
| 0.0018834      | 203038_at       | 0.61               | PTPRK         | Protein tyrosine phosphatase, receptor type, K                     | 5796            |

| <b>P value</b> | <b>ProbeSet</b> | <b>Fold change</b> | <b>Symbol</b> | <b>Name</b>                                                            | <b>EntrezID</b> |
|----------------|-----------------|--------------------|---------------|------------------------------------------------------------------------|-----------------|
| 0.0043846      | 214607_at       | 0.61               | PAK3          | P21 protein (Cdc42/Rac)-activated kinase 3                             | 5063            |
| 0.0059124      | 201260_s_at     | 0.61               | SYPL1         | Synaptophysin-like 1                                                   | 6856            |
| 0.0064999      | 213469_at       | 0.61               | PGAP1         | Post-GPI attachment to proteins 1                                      | 80055           |
| 0.0074247      | 214706_at       | 0.61               | ZNF200        | Zinc finger protein 200                                                | 7752            |
| 0.0013398      | 201022_s_at     | 0.6                | DSTN          | Destrin (actin depolymerizing factor)                                  | 11034           |
| 0.0016034      | 211747_s_at     | 0.6                | LSM5          | LSM5 homolog, U6 small nuclear RNA associated ( <i>S. Cerevisiae</i> ) | 23658           |
| 0.0035419      | 204793_at       | 0.6                | GPRASP1       | G protein-coupled receptor associated sorting protein 1                | 9737            |
| 0.0089994      | 213839_at       | 0.6                | CLMN          | Calmin (calponin-like, transmembrane)                                  | 79789           |
| 6.50E-06       | 211600_at       | 0.59               | PTPRO         | Protein tyrosine phosphatase, receptor type, O                         | 5800            |
| 0.0008008      | 212148_at       | 0.59               | PBX1          | Pre-B-cell leukemia homeobox 1                                         | 5087            |
| 0.0015038      | 208796_s_at     | 0.59               | CCNG1         | Cyclin G1                                                              | 900             |
| 0.0019117      | 201599_at       | 0.59               | OAT           | Ornithine aminotransferase                                             | 4942            |
| 0.0086192      | 209288_s_at     | 0.59               | CDC42EP3      | CDC42 effector protein (Rho gtpase binding) 3                          | 10602           |
| 0.0003319      | 202221_s_at     | 0.58               | EP300         | E1A binding protein p300                                               | 2033            |
| 0.0013392      | 203991_s_at     | 0.58               | KDM6A         | Lysine (K)-specific demethylase 6A                                     | 7403            |
| 0.0041355      | 209242_at       | 0.58               | PEG3          | Paternally expressed 3                                                 | 5178            |
| 0.0047915      | 212828_at       | 0.58               | SYNJ2         | Synaptojanin 2                                                         | 8871            |
| 0.0001605      | 201939_at       | 0.57               | PLK2          | Polo-like kinase 2                                                     | 10769           |
| 0.0003596      | 203202_at       | 0.57               | KRR1          | KRR1, small subunit (SSU) processome component, homolog (yeast)        | 11103           |
| 0.0005632      | 201660_at       | 0.57               | ACSL3         | Acyl-coa synthetase long-chain family member 3                         | 2181            |
| 0.0006966      | 202023_at       | 0.57               | EFNA1         | Ephrin-A1                                                              | 1942            |
| 0.0030389      | 203726_s_at     | 0.57               | LAMA3         | Laminin, alpha 3                                                       | 3909            |
| 0.0042823      | 206916_x_at     | 0.57               | TAT           | Tyrosine aminotransferase                                              | 6898            |
| 0.0053019      | 217901_at       | 0.57               | DSG2          | Desmoglein 2                                                           | 1829            |
| 0.0006958      | 203710_at       | 0.56               | ITPR1         | Inositol 1,4,5-triphosphate receptor, type 1                           | 3708            |
| 0.001748       | 203394_s_at     | 0.56               | HES1          | Hairy and enhancer of split 1, ( <i>Drosophila</i> )                   | 3280            |
| 0.0021628      | 205094_at       | 0.55               | PEX12         | Peroxisomal biogenesis factor 12                                       | 5193            |
| 0.0021706      | 202704_at       | 0.55               | TOB1          | Transducer of ERBB2, 1                                                 | 10140           |
| 0.0039012      | 205347_s_at     | 0.55               | TMSB15A       | Thymosin beta 15a                                                      | 11013           |
| 0.0040583      | 205752_s_at     | 0.55               | GSTM5         | Glutathione S-transferase mu 5                                         | 2949            |
| 0.0015814      | 213929_at       | 0.54               | EXPH5         | Exophilin 5                                                            | 23086           |
| 0.0015844      | 213107_at       | 0.54               | TNIK          | TRAF2 and NCK interacting kinase                                       | 23043           |
| 0.0002225      | 200017_at       | 0.53               | RPS27A        | Ribosomal protein s27a                                                 | 6233            |
| 0.0041981      | 218804_at       | 0.53               | ANO1          | Anoctamin 1, calcium activated chloride channel                        | 55107           |
| 0.0017249      | 213222_at       | 0.52               | PLCB1         | Phospholipase C, beta 1 (phosphoinositide-specific)                    | 23236           |
| 0.0068033      | 205442_at       | 0.51               | MFAP3L        | Microfibrillar-associated protein 3-like                               | 9848            |
| 0.0072749      | 214023_x_at     | 0.51               | TUBB2B        | Tubulin, beta 2B                                                       | 347733          |

| P value          | ProbeSet           | Fold change | Symbol            | Name                                                                       | EntrezID    |
|------------------|--------------------|-------------|-------------------|----------------------------------------------------------------------------|-------------|
| 0.0083554        | 204855_at          | 0.51        | SERPINB5          | Serpin peptidase inhibitor, clade B (ovalbumin), member 5                  | 5268        |
| 0.0038523        | 219115_s_at        | 0.5         | IL20RA            | Interleukin 20 receptor, alpha                                             | 53832       |
| 0.0005266        | 209905_at          | 0.48        | HOXA9             | Homeobox A9                                                                | 3205        |
| 0.0012729        | 213110_s_at        | 0.48        | COL4A5            | Collagen, type IV, alpha 5                                                 | 1287        |
| 0.0033316        | 209842_at          | 0.48        | SOX10             | SRY (sex determining region Y)-box 10                                      | 6663        |
| 0.0016353        | 209570_s_at        | 0.47        | D4S234E           | DNA segment on chromosome 4 (unique) 234 expressed sequence                | 27065       |
| 0.0001791        | 213900_at          | 0.46        | FAM189A2          | Family with sequence similarity 189, member A2                             | 9413        |
| 0.0030111        | 219313_at          | 0.46        | GRAMD1C           | GRAM domain containing 1C                                                  | 54762       |
| 0.0052763        | 209469_at          | 0.46        | GPM6A             | Glycoprotein M6A                                                           | 2823        |
| 0.0078456        | 206104_at          | 0.46        | ISL1              | ISL LIM homeobox 1                                                         | 3670        |
| 0.0011572        | 209343_at          | 0.45        | EFHD1             | EF-hand domain family, member D1                                           | 80303       |
| 0.0051612        | 206772_at          | 0.44        | PTH2R             | Parathyroid hormone 2 receptor                                             | 5746        |
| 0.0081843        | 203438_at          | 0.44        | STC2              | Stanniocalcin 2                                                            | 8614        |
| 8.36E-05         | 213992_at          | 0.42        | COL4A6            | Collagen, type IV, alpha 6                                                 | 1288        |
| 0.000422         | 211423_s_at        | 0.42        | SC5DL             | Sterol-C5-desaturase (ERG3 delta-5-desaturase homolog, S. Cerevisiae)-like | 6309        |
| 0.0076361        | 214761_at          | 0.42        | ZNF423            | Zinc finger protein 423                                                    | 23090       |
| 0.0091814        | 219476_at          | 0.42        | C1orf116          | Chromosome 1 open reading frame 116                                        | 79098       |
| 1.05E-05         | 221207_s_at        | 0.4         | NBEA              | Neurobeachin                                                               | 26960       |
| 0.005744         | 213695_at          | 0.4         | PON3              | Paraoxonase 3                                                              | 5446        |
| 0.0039097        | 203797_at          | 0.39        | VSNL1             | Visinin-like 1                                                             | 7447        |
| 1.89E-05         | 205352_at          | 0.38        | SERPINI1          | Serpin peptidase inhibitor, clade I (neuroserpin), member 1                | 5274        |
| 0.0005944        | 210432_s_at        | 0.38        | SCN3A             | Sodium channel, voltage-gated, type III, alpha subunit                     | 6328        |
| 0.0013149        | 219308_s_at        | 0.35        | AK5               | Adenylate kinase 5                                                         | 26289       |
| 0.0016672        | 209863_s_at        | 0.35        | TP63              | Tumor protein p63                                                          | 8626        |
| 4.74E-05         | 203638_s_at        | 0.34        | FGFR2             | Fibroblast growth factor receptor 2                                        | 2263        |
| 0.0003375        | 218541_s_at        | 0.33        | C8orf4            | Chromosome 8 open reading frame 4                                          | 56892       |
| 0.0042707        | 206143_at          | 0.32        | SLC26A3           | Solute carrier family 26, member 3                                         | 1811        |
| <b>0.0036168</b> | <b>205030_at</b>   | <b>0.29</b> | <b>FABP7</b>      | <b>Fatty acid binding protein 7, brain</b>                                 | <b>2173</b> |
| 0.0016194        | 206825_at          | 0.27        | OXTR <sup>a</sup> | Oxytocin receptor                                                          | 5021        |
| <b>0.0012488</b> | <b>214087_s_at</b> | <b>0.24</b> | <b>MYBPC1</b>     | <b>Myosin binding protein C, slow type</b>                                 | <b>4604</b> |
| <b>0.0022278</b> | <b>214598_at</b>   | <b>0.2</b>  | <b>CLDN8</b>      | <b>Claudin 8</b>                                                           | <b>9073</b> |
| <b>0.0053071</b> | <b>206509_at</b>   | <b>0.16</b> | <b>PIP</b>        | <b>Prolactin-induced protein</b>                                           | <b>5304</b> |
| 8.11E-05         | 209480_at          | 0.11        | HLA-DQB1          | Major histocompatibility complex, class II, DQ beta 1                      | 3119        |
| 0.0001867        | 213831_at          | 0.11        | HLA-DQA1          | Major histocompatibility complex, class II, DQ alpha 1                     | 3117        |

<sup>a</sup>Differential expression of OXTR could not be validated using TaqMan gene expression assay Hs00168573\_m1

**Table S3.** Genes differentially expressed between distant adipose compared to adipose from non-malignant breasts. Expression level differences were validated for those genes in bold.

| <b>P value</b>   | <b>ProbeSet</b>    | <b>Fold change</b> | <b>Symbol</b> | <b>Name</b>                                                                  | <b>EntrezID</b> |
|------------------|--------------------|--------------------|---------------|------------------------------------------------------------------------------|-----------------|
| <b>0.0010801</b> | <b>205819_at</b>   | <b>3.39</b>        | <b>MARCO</b>  | <b>Macrophage receptor with collagenous structure</b>                        | <b>8685</b>     |
| <b>1.62E-05</b>  | <b>204829_s_at</b> | <b>2.94</b>        | <b>FOLR2</b>  | <b>Folate receptor 2 (fetal)</b>                                             | <b>2350</b>     |
| 0.0003428        | 204787_at          | 2.85               | VSIG4         | V-set and immunoglobulin domain containing 4                                 | 11326           |
| 0.0011312        | 218232_at          | 2.65               | C1QA          | Complement component 1, q subcomponent, A chain                              | 712             |
| <b>2.23E-05</b>  | <b>201212_at</b>   | <b>2.64</b>        | <b>LGMN</b>   | <b>Legumain</b>                                                              | <b>5641</b>     |
| 0.000614         | 202953_at          | 2.63               | C1QB          | Complement component 1, q subcomponent, B chain                              | 713             |
| 0.0014996        | 201785_at          | 2.45               | RNASE1        | Ribonuclease, rnase A family, 1 (pancreatic)                                 | 6035            |
| 0.000708         | 201743_at          | 2.44               | CD14          | CD14 molecule                                                                | 929             |
| 0.0005315        | 215049_x_at        | 2.43               | CD163         | CD163 molecule                                                               | 9332            |
| 0.0031742        | 205653_at          | 2.41               | CTSG          | Cathepsin G                                                                  | 1511            |
| 0.0004546        | 219607_s_at        | 2.39               | MS4A4A        | Membrane-spanning 4-domains, subfamily A, member 4                           | 51338           |
| 0.0001159        | 38487_at           | 2.38               | STAB1         | Stabilin 1                                                                   | 23166           |
| 0.0008557        | 203886_s_at        | 2.36               | FBLN2         | Fibulin 2                                                                    | 2199            |
| 0.0016102        | 206682_at          | 2.35               | CLEC10A       | C-type lectin domain family 10, member A                                     | 10462           |
| 0.0002564        | 210889_s_at        | 2.32               | FCGR2B        | Fc fragment of igg, low affinity iib, receptor (CD32)                        | 2213            |
| 0.0002939        | 203473_at          | 2.31               | SLCO2B1       | Solute carrier organic anion transporter family, member 2B1                  | 11309           |
| <b>1.52E-05</b>  | <b>207075_at</b>   | <b>2.28</b>        | <b>NLRP3</b>  | <b>NLR family, pyrin domain containing 3</b>                                 | <b>114548</b>   |
| <b>0.0002033</b> | <b>203561_at</b>   | <b>2.28</b>        | <b>FCGR2A</b> | <b>Fc fragment of igg, low affinity iia, receptor (CD32)</b>                 | <b>2212</b>     |
| 0.0056765        | 217552_x_at        | 2.28               | CR1           | Complement component (3b/4b) receptor 1 (Knops blood group)                  | 1378            |
| 0.0025621        | 208186_s_at        | 2.27               | LIPE          | Lipase, hormone-sensitive                                                    | 3991            |
| 0.0053181        | 205200_at          | 2.26               | CLEC3B        | C-type lectin domain family 3, member B                                      | 7123            |
| 0.0017459        | 200736_s_at        | 2.25               | GPX1          | Glutathione peroxidase 1                                                     | 2876            |
| 0.0080067        | 203665_at          | 2.24               | HMOX1         | Hemeoxygenase (decycling) 1                                                  | 3162            |
| 0.0014503        | 207277_at          | 2.21               | CD209         | CD209 molecule                                                               | 30835           |
| 0.0042803        | 200852_x_at        | 2.2                | GNB2          | Guanine nucleotide binding protein (G protein), beta polypeptide 2           | 2783            |
| 0.0007559        | 209906_at          | 2.19               | C3AR1         | Complement component 3a receptor 1                                           | 719             |
| 0.0045844        | 207057_at          | 2.18               | SLC16A7       | Solute carrier family 16, member 7 (monocarboxylic acid transporter 2)       | 9194            |
| 0.0028053        | 202839_s_at        | 2.16               | NDUFB7        | NADH dehydrogenase (ubiquinone) 1 beta subcomplex, 7, 18kda                  | 4713            |
| 0.0005139        | 219025_at          | 2.15               | CD248         | CD248 molecule, endosialin                                                   | 57124           |
| 0.0083163        | 203915_at          | 2.12               | CXCL9         | Chemokine (C-X-C motif) ligand 9                                             | 4283            |
| 0.0014606        | 209417_s_at        | 2.06               | IFI35         | Interferon-induced protein 35                                                | 3430            |
| 0.0014435        | 205488_at          | 2.05               | GZMA          | Granzyme A (granzyme 1, cytotoxic T-lymphocyte-associated serine esterase 3) | 3001            |

| P value   | ProbeSet    | Fold change | Symbol  | Name                                                                                         | EntrezID |
|-----------|-------------|-------------|---------|----------------------------------------------------------------------------------------------|----------|
| 0.0003811 | 202947_s_at | 2.02        | GYPC    | Glycophorin C (Gerbich blood group)                                                          | 2995     |
| 0.0052893 | 218934_s_at | 2.01        | HSPB7   | Heat shock 27kda protein family, member 7 (cardiovascular)                                   | 27129    |
| 0.0015231 | 208961_s_at | 2           | KLF6    | Kruppel-like factor 6                                                                        | 1316     |
| 0.001731  | 203028_s_at | 2           | CYBA    | Cytochrome b-245, alpha polypeptide                                                          | 1535     |
| 0.0017816 | 212886_at   | 2           | CCDC69  | Coiled-coil domain containing 69                                                             | 26112    |
| 1.89E-05  | 202910_s_at | 1.99        | CD97    | CD97 molecule                                                                                | 976      |
| 0.0002628 | 210740_s_at | 1.98        | ITPK1   | Inositol 1,3,4-triphosphate 5/6 kinase                                                       | 3705     |
| 0.0002306 | 210644_s_at | 1.97        | LAIR1   | Leukocyte-associated immunoglobulin-like receptor 1                                          | 3903     |
| 0.0030384 | 205792_at   | 1.97        | WISP2   | WNT1 inducible signaling pathway protein 2                                                   | 8839     |
| 0.0054961 | 32837_at    | 1.96        | AGPAT2  | 1-acylglycerol-3-phosphate O-acyltransferase 2 (lysophosphatidic acid acyltransferase, beta) | 10555    |
| 0.0012688 | 218272_at   | 1.95        | TTC38   | Tetratricopeptide repeat domain 38                                                           | 55020    |
| 0.0014272 | 202942_at   | 1.95        | ETFB    | Electron-transfer-flavoprotein, beta polypeptide                                             | 2109     |
| 0.0020501 | 204122_at   | 1.93        | TYROBP  | TYRO protein tyrosine kinase binding protein                                                 | 7305     |
| 0.0024253 | 218384_at   | 1.93        | CARHSP1 | Calcium regulated heat stable protein 1, 24kda                                               | 23589    |
| 0.0024565 | 205012_s_at | 1.93        | HAGH    | Hydroxyacylglutathione hydrolase                                                             | 3029     |
| 0.0005018 | 202366_at   | 1.92        | ACADS   | Acyl-coa dehydrogenase, C-2 to C-3 short chain                                               | 35       |
| 0.0017154 | 200678_x_at | 1.92        | GRN     | Granulin                                                                                     | 2896     |
| 0.0007081 | 221667_s_at | 1.91        | HSPB8   | Heat shock 22kda protein 8                                                                   | 26353    |
| 0.0040253 | 219059_s_at | 1.9         | LYVE1   | Lymphatic vessel endothelial hyaluronan receptor 1                                           | 10894    |
| 0.0025086 | 206407_s_at | 1.89        | CCL13   | Chemokine (C-C motif) ligand 13                                                              | 6357     |
| 0.0003908 | 206219_s_at | 1.88        | VAV1    | Vav 1 guanine nucleotide exchange factor                                                     | 7409     |
| 0.0023666 | 203760_s_at | 1.88        | SLA     | Src-like-adaptor                                                                             | 6503     |
| 0.0029617 | 210155_at   | 1.88        | MYOC    | Myocilin, trabecular meshwork inducible glucocorticoid response                              | 4653     |
| 0.0085083 | 204647_at   | 1.88        | HOMER3  | Homer homolog 3 (Drosophila)                                                                 | 9454     |
| 0.0094013 | 205349_at   | 1.88        | GNA15   | Guanine nucleotide binding protein (G protein), alpha 15 (Gq class)                          | 2769     |
| 0.0015471 | 202180_s_at | 1.87        | MVP     | Major vault protein                                                                          | 9961     |
| 0.003097  | 219358_s_at | 1.87        | ADAP2   | Arfgap with dual PH domains 2                                                                | 55803    |
| 0.0032819 | 214297_at   | 1.87        | CSPG4   | Chondroitin sulfate proteoglycan 4                                                           | 1464     |
| 0.0040892 | 209263_x_at | 1.87        | TSPAN4  | Tetraspanin 4                                                                                | 7106     |
| 0.0045807 | 206855_s_at | 1.87        | HYAL2   | Hyaluronoglucosaminidase 2                                                                   | 8692     |
| 0.0009518 | 208712_at   | 1.85        | CCND1   | Cyclin D1                                                                                    | 595      |
| 0.0010521 | 202957_at   | 1.85        | HCLS1   | Hematopoietic cell-specific Lyn substrate 1                                                  | 3059     |
| 0.0023964 | 205786_s_at | 1.85        | ITGAM   | Integrin, alpha M (complement component 3 receptor 3 subunit)                                | 3684     |
| 0.0001594 | 207571_x_at | 1.84        | C1orf38 | Chromosome 1 open reading frame 38                                                           | 9473     |
| 0.002247  | 208609_s_at | 1.84        | TNXB    | Tenascin XB                                                                                  | 7148     |
| 0.0038565 | 203305_at   | 1.84        | F13A1   | Coagulation factor XIII, A1 polypeptide                                                      | 2162     |



| <b>P value</b> | <b>ProbeSet</b> | <b>Fold change</b> | <b>Symbol</b> | <b>Name</b>                                                                             | <b>EntrezID</b> |
|----------------|-----------------|--------------------|---------------|-----------------------------------------------------------------------------------------|-----------------|
| 0.007911       | 211748_x_at     | 1.84               | PTGDS         | Prostaglandin D2 synthase 21kda (brain)                                                 | 5730            |
| 0.0098874      | 201403_s_at     | 1.84               | MGST3         | Microsomal glutathione S-transferase 3                                                  | 4259            |
| 0.0003852      | 201819_at       | 1.83               | SCARB1        | Scavenger receptor class B, member 1                                                    | 949             |
| 0.001054       | 211752_s_at     | 1.83               | NDUF57        | NADH dehydrogenase (ubiquinone) Fe-S protein 7, 20kda (NADH-coenzyme Q reductase)       | 374291          |
| 0.0016253      | 203104_at       | 1.83               | CSF1R         | Colony stimulating factor 1 receptor                                                    | 1436            |
| 0.0010487      | 221794_at       | 1.81               | DOCK6         | Dedicator of cytokinesis 6                                                              | 57572           |
| 0.0058525      | 205483_s_at     | 1.81               | ISG15         | ISG15 ubiquitin-like modifier                                                           | 9636            |
| 0.0061227      | 205098_at       | 1.81               | CCR1          | Chemokine (C-C motif) receptor 1                                                        | 1230            |
| 0.0089685      | 207509_s_at     | 1.81               | LAIR2         | Leukocyte-associated immunoglobulin-like receptor 2                                     | 3904            |
| 0.0003233      | 219952_s_at     | 1.8                | MCOLN1        | Mucolipin 1                                                                             | 57192           |
| 0.0001103      | 219183_s_at     | 1.79               | CYTH4         | Cytohesin 4                                                                             | 27128           |
| 0.0035159      | 210751_s_at     | 1.79               | RGN           | Regucalcin (senescence marker protein-30)                                               | 9104            |
| 0.0053117      | 201360_at       | 1.79               | CST3          | Cystatin C                                                                              | 1471            |
| 0.0003852      | 217362_x_at     | 1.78               | HLA-DRB6      | Major histocompatibility complex, class II, DR beta 6 (pseudogene)                      | 3128            |
| 0.0007804      | 207196_s_at     | 1.78               | TNIP1         | TNFAIP3 interacting protein 1                                                           | 10318           |
| 0.0020273      | 205128_x_at     | 1.78               | PTGS1         | Prostaglandin-endoperoxide synthase 1 (prostaglandin G/H synthase and cyclooxygenase)   | 5742            |
| 0.0078918      | 206737_at       | 1.78               | WNT11         | Wingless-type MMTV integration site family, member 11                                   | 7481            |
| 0.0012086      | 202880_s_at     | 1.77               | CYTH1         | Cytohesin 1                                                                             | 9267            |
| 0.0056499      | 217914_at       | 1.77               | TPCN1         | Two pore segment channel 1                                                              | 53373           |
| 0.0003202      | 209685_s_at     | 1.76               | PRKCB         | Protein kinase C, beta                                                                  | 5579            |
| 0.0030148      | 206441_s_at     | 1.76               | COMM4         | COMM domain containing 4                                                                | 54939           |
| 0.0082073      | 214770_at       | 1.76               | MSR1          | Macrophage scavenger receptor 1                                                         | 4481            |
| 0.0018638      | 211576_s_at     | 1.75               | SLC19A1       | Solute carrier family 19 (folate transporter), member 1                                 | 6573            |
| 0.006351       | 203803_at       | 1.75               | PCYOX1        | Prenylcysteine oxidase 1                                                                | 51449           |
| 0.0075075      | 203234_at       | 1.75               | UPP1          | Uridinephosphorylase 1                                                                  | 7378            |
| 0.0085947      | 204331_s_at     | 1.75               | MRPS12        | Mitochondrial ribosomal protein S12                                                     | 6183            |
| 0.0010385      | 211432_s_at     | 1.74               | TYRO3         | TYRO3 protein tyrosine kinase                                                           | 7301            |
| 0.0011145      | 208714_at       | 1.74               | NDUFV1        | NADH dehydrogenase (ubiquinone) flavoprotein 1, 51kda                                   | 4723            |
| 0.0022778      | 210075_at       | 1.74               | MARCH2        | Membrane-associated ring finger (C3HC4) 2                                               | 51257           |
| 0.0049022      | 212086_x_at     | 1.74               | LMNA          | Lamin A/C                                                                               | 4000            |
| 0.0064985      | 220357_s_at     | 1.74               | SGK2          | Serum/glucocorticoid regulated kinase 2                                                 | 10110           |
| 0.0015893      | 44673_at        | 1.73               | SIGLEC1       | Sialic acid binding Ig-like lectin 1, sialoadhesin                                      | 6614            |
| 0.0027392      | 204912_at       | 1.73               | IL10RA        | Interleukin 10 receptor, alpha                                                          | 3587            |
| 0.0003869      | 208625_s_at     | 1.72               | EIF4G1        | Eukaryotic translation initiation factor 4 gamma, 1                                     | 1981            |
| 0.000455       | 201040_at       | 1.71               | GNAI2         | Guanine nucleotide binding protein (G protein), alpha inhibiting activity polypeptide 2 | 2771            |

| <b>P value</b> | <b>ProbeSet</b> | <b>Fold change</b> | <b>Symbol</b> | <b>Name</b>                                                        | <b>EntrezID</b> |
|----------------|-----------------|--------------------|---------------|--------------------------------------------------------------------|-----------------|
| 0.0005746      | 203508_at       | 1.7                | TNFRSF1B      | Tumor necrosis factor receptor superfamily, member 1B              | 7133            |
| 0.0073727      | 219666_at       | 1.7                | MS4A6A        | Membrane-spanning 4-domains, subfamily A, member 6A                | 64231           |
| 0.0035371      | 221276_s_at     | 1.69               | SYNC          | Syncoilin, intermediate filament protein                           | 81493           |
| 0.0003786      | 219282_s_at     | 1.68               | TRPV2         | Transient receptor potential cation channel, subfamily V, member 2 | 51393           |
| 0.0015118      | 214617_at       | 1.68               | PRF1          | Perforin 1 (pore forming protein)                                  | 5551            |
| 0.0026015      | 209039_x_at     | 1.68               | EHD1          | EH-domain containing 1                                             | 10938           |
| 0.0069669      | 208827_at       | 1.68               | PSMB6         | Proteasome (prosome, macropain) subunit, beta type, 6              | 5694            |
| 0.0031395      | 202927_at       | 1.67               | PIN1          | Peptidylprolyl cis/trans isomerase, NIMA-interacting 1             | 5300            |
| 0.0039602      | 212873_at       | 1.67               | HMHA1         | Histocompatibility (minor) HA-1                                    | 23526           |
| 0.0086447      | 218130_at       | 1.67               | C17orf62      | Chromosome 17 open reading frame 62                                | 79415           |
| 0.0014898      | 204167_at       | 1.66               | BTD           | Biotinidase                                                        | 686             |
| 0.0064691      | 218153_at       | 1.66               | CARS2         | Cysteinylnl-trna synthetase 2, mitochondrial (putative)            | 79587           |
| 0.0088391      | 219656_at       | 1.66               | PCDH12        | Protocadherin 12                                                   | 51294           |
| 0.0010179      | 210205_at       | 1.65               | B3GALT4       | UDP-Gal:betaglcnac beta 1,3-galactosyltransferase, polypeptide 4   | 8705            |
| 0.0027363      | 210201_x_at     | 1.65               | BIN1          | Bridging integrator 1                                              | 274             |
| 0.0034332      | 59705_at        | 1.65               | SCLY          | Selenocysteinylase                                                 | 51540           |
| 0.0039691      | 40016_g_at      | 1.65               | MAST4         | Microtubule associated serine/threonine kinase family member 4     | 375449          |
| 0.0042851      | 204057_at       | 1.65               | IRF8          | Interferon regulatory factor 8                                     | 3394            |
| 0.0064266      | 218843_at       | 1.65               | FNDC4         | Fibronectin type III domain containing 4                           | 64838           |
| 0.00768        | 217925_s_at     | 1.65               | C6orf106      | Chromosome 6 open reading frame 106                                | 64771           |
| 0.006673       | 205290_s_at     | 1.64               | BMP2          | Bone morphogenetic protein 2                                       | 650             |
| 0.0070972      | 219909_at       | 1.64               | MMP28         | Matrix metalloproteinase 28                                        | 79148           |
| 0.0082156      | 56821_at        | 1.64               | SLC38A7       | Solute carrier family 38, member 7                                 | 55238           |
| 0.0032591      | 218105_s_at     | 1.63               | MRPL4         | Mitochondrial ribosomal protein L4                                 | 51073           |
| 0.0019635      | 202332_at       | 1.62               | CSNK1E        | Casein kinase 1, epsilon                                           | 1454            |
| 0.0028799      | 203588_s_at     | 1.62               | TFDP2         | Transcription factor Dp-2 (E2F dimerization partner 2)             | 7029            |
| 0.0034019      | 209244_s_at     | 1.62               | KIF1C         | Kinesin family member 1C                                           | 10749           |
| 0.005649       | 201655_s_at     | 1.62               | HSPG2         | Heparan sulfate proteoglycan 2                                     | 3339            |
| 0.0074914      | 208928_at       | 1.62               | POR           | P450 (cytochrome) oxidoreductase                                   | 5447            |
| 0.0079795      | 36829_at        | 1.62               | PER1          | Period homolog 1 (Drosophila)                                      | 5187            |
| 0.0002843      | 218945_at       | 1.61               | C16orf68      | Chromosome 16 open reading frame 68                                | 79091           |
| 0.0012979      | 210746_s_at     | 1.61               | EPB42         | Erythrocyte membrane protein band 4.2                              | 2038            |
| 0.0023587      | 201511_at       | 1.61               | AAMP          | Angio-associated, migratory cell protein                           | 14              |
| 0.0030112      | 213160_at       | 1.61               | DOCK2         | Dedicator of cytokinesis 2                                         | 1794            |
| 0.0062256      | 204610_s_at     | 1.61               | CCDC85B       | Coiled-coil domain containing 85B                                  | 11007           |
| 0.0082938      | 220956_s_at     | 1.61               | EGLN2         | Egl nine homolog 2 (C. Elegans)                                    | 112398          |

| <b>P value</b> | <b>ProbeSet</b> | <b>Fold change</b> | <b>Symbol</b> | <b>Name</b>                                                           | <b>EntrezID</b> |
|----------------|-----------------|--------------------|---------------|-----------------------------------------------------------------------|-----------------|
| 0.0011601      | 205125_at       | 1.6                | PLCD1         | Phospholipase C, delta 1                                              | 5333            |
| 0.0022791      | 209042_s_at     | 1.6                | UBE2G2        | Ubiquitin-conjugating enzyme E2G 2 (UBC7 homolog, yeast)              | 7327            |
| 5.55E-05       | 201609_x_at     | 1.59               | ICMT          | Isoprenylcysteine carboxyl methyltransferase                          | 23463           |
| 0.0006463      | 212975_at       | 1.59               | DENND3        | DENN/MADD domain containing 3                                         | 22898           |
| 0.0018069      | 210640_s_at     | 1.59               | GPER          | G protein-coupled estrogen receptor 1                                 | 2852            |
| 0.0051877      | 220141_at       | 1.59               | C11orf63      | Chromosome 11 open reading frame 63                                   | 79864           |
| 0.0003573      | 205620_at       | 1.58               | F10           | Coagulation factor X                                                  | 2159            |
| 0.0017945      | 38671_at        | 1.58               | PLXND1        | Plexin D1                                                             | 23129           |
| 0.0019187      | 220757_s_at     | 1.58               | UBXN6         | UBX domain protein 6                                                  | 80700           |
| 0.0022487      | 206950_at       | 1.58               | SCN9A         | Sodium channel, voltage-gated, type IX, alpha subunit                 | 6335            |
| 0.0054075      | 212540_at       | 1.58               | CDC34         | Cell division cycle 34 homolog (S. Cerevisiae)                        | 997             |
| 0.0091684      | 221692_s_at     | 1.58               | MRPL34        | Mitochondrial ribosomal protein L34                                   | 64981           |
| 0.0002976      | 213656_s_at     | 1.57               | KLC1          | Kinesin light chain 1                                                 | 3831            |
| 0.0017952      | 205988_at       | 1.57               | CD84          | CD84 molecule                                                         | 8832            |
| 0.0044688      | 202564_x_at     | 1.57               | ARL2          | ADP-ribosylation factor-like 2                                        | 402             |
| 0.006468       | 206545_at       | 1.57               | CD28          | CD28 molecule                                                         | 940             |
| 0.0080006      | 218144_s_at     | 1.57               | INF2          | Inverted formin, FH2 and WH2 domain containing                        | 64423           |
| 0.0001693      | 204360_s_at     | 1.56               | NAGLU         | N-acetylglucosaminidase, alpha                                        | 4669            |
| 0.0014011      | 37384_at        | 1.56               | PPM1F         | Protein phosphatase, Mg2+/Mn2+ dependent, 1F                          | 9647            |
| 0.0021849      | 205423_at       | 1.56               | AP1B1         | Adaptor-related protein complex 1, beta 1 subunit                     | 162             |
| 0.0088282      | 201379_s_at     | 1.56               | TPD52L2       | Tumor protein D52-like 2                                              | 7165            |
| 0.0092135      | 220088_at       | 1.56               | C5AR1         | Complement component 5a receptor 1                                    | 728             |
| 0.0004568      | 220007_at       | 1.55               | METTL8        | Methyltransferase like 8                                              | 79828           |
| 0.0006347      | 212144_at       | 1.55               | SUN2          | Sad1 and UNC84 domain containing 2                                    | 25777           |
| 0.0023351      | 220005_at       | 1.55               | P2RY13        | Purinergic receptor P2Y, G-protein coupled, 13                        | 53829           |
| 0.0028913      | 204276_at       | 1.55               | TK2           | Thymidine kinase 2, mitochondrial                                     | 7084            |
| 0.0030276      | 208918_s_at     | 1.55               | NADK          | NAD kinase                                                            | 65220           |
| 0.0033562      | 218046_s_at     | 1.55               | MRPS16        | Mitochondrial ribosomal protein S16                                   | 51021           |
| 0.0050579      | 217808_s_at     | 1.55               | MAPKAP1       | Mitogen-activated protein kinase associated protein 1                 | 79109           |
| 0.0068939      | 205036_at       | 1.55               | LSM6          | LSM6 homolog, U6 small nuclear RNA associated (S. Cerevisiae)         | 11157           |
| 0.000627       | 209980_s_at     | 1.54               | SHMT1         | Serine hydroxymethyltransferase 1 (soluble)                           | 6470            |
| 0.0065949      | 203717_at       | 1.54               | DPP4          | Dipeptidyl-peptidase 4                                                | 1803            |
| 0.0081493      | 210762_s_at     | 1.54               | DLC1          | Deleted in liver cancer 1                                             | 10395           |
| 0.0090686      | 203010_at       | 1.54               | STAT5A        | Signal transducer and activator of transcription 5A                   | 6776            |
| 0.0003598      | 201186_at       | 1.53               | LRPAP1        | Low density lipoprotein receptor-related protein associated protein 1 | 4043            |
| 9.40E-05       | 204174_at       | 1.52               | ALOX5AP       | Arachidonate 5-lipoxygenase-activating protein                        | 241             |

| <b>P value</b> | <b>ProbeSet</b> | <b>Fold change</b> | <b>Symbol</b> | <b>Name</b>                                                            | <b>EntrezID</b> |
|----------------|-----------------|--------------------|---------------|------------------------------------------------------------------------|-----------------|
| 0.0029075      | 215075_s_at     | 1.52               | GRB2          | Growth factor receptor-bound protein 2                                 | 2885            |
| 0.0034972      | 204663_at       | 1.52               | ME3           | Malic enzyme 3, NADP(+)-dependent, mitochondrial                       | 10873           |
| 0.0050172      | 204135_at       | 1.52               | FILIP1L       | Filamin A interacting protein 1-like                                   | 11259           |
| 0.0060146      | 217784_at       | 1.52               | YKT6          | YKT6 v-SNARE homolog (S. Cerevisiae)                                   | 10652           |
| 0.0060788      | 209665_at       | 1.52               | CYB561D2      | Cytochrome b-561 domain containing 2                                   | 11068           |
| 0.0065684      | 217849_s_at     | 1.52               | CDC42BPB      | CDC42 binding protein kinase beta (DMPK-like)                          | 9578            |
| 0.0076546      | 212739_s_at     | 1.52               | NME4          | Non-metastatic cells 4, protein expressed in                           | 4833            |
| 0.0082059      | 218487_at       | 1.52               | ALAD          | Aminolevulinatedehydratase                                             | 210             |
| 0.005567       | 219431_at       | 1.51               | ARHGAP10      | Rho gtpase activating protein 10                                       | 79658           |
| 0.0061836      | 218743_at       | 1.51               | CHMP6         | Chromatin modifying protein 6                                          | 79643           |
| 0.0004652      | 207233_s_at     | 1.5                | MITF          | Microphthalmia-associated transcription factor                         | 4286            |
| 0.0015361      | 210163_at       | 1.5                | CXCL11        | Chemokine (C-X-C motif) ligand 11                                      | 6373            |
| 0.0070556      | 202154_x_at     | 1.5                | TUBB3         | Tubulin, beta 3                                                        | 10381           |
| 1.35E-05       | 52975_at        | 1.49               | FAM125B       | Family with sequence similarity 125, member B                          | 89853           |
| 0.000674       | 218610_s_at     | 1.48               | CPPED1        | Calcineurin-like phosphoesterase domain containing 1                   | 55313           |
| 0.001931       | 211974_x_at     | 1.48               | RBPJ          | Recombination signal binding protein for immunoglobulin kappa J region | 3516            |
| 0.002931       | 206637_at       | 1.48               | P2RY14        | Purinergic receptor P2Y, G-protein coupled, 14                         | 9934            |
| 0.0045685      | 214054_at       | 1.48               | DOK2          | Docking protein 2, 56kda                                               | 9046            |
| 0.0018906      | 212860_at       | 1.47               | ZDHHC18       | Zinc finger, DHHC-type containing 18                                   | 84243           |
| 0.0035638      | 218540_at       | 1.47               | THTPA         | Thiamine triphosphatase                                                | 79178           |
| 0.0048923      | 219020_at       | 1.47               | HS1BP3        | HCLS1 binding protein 3                                                | 64342           |
| 0.0016151      | 202449_s_at     | 1.46               | RXRA          | Retinoid X receptor, alpha                                             | 6256            |
| 0.0019224      | 216323_x_at     | 1.46               | TUBA3D        | Tubulin, alpha 3d                                                      | 113457          |
| 0.0020095      | 205401_at       | 1.46               | AGPS          | Alkylglycerone phosphate synthase                                      | 8540            |
| 0.0031294      | 204505_s_at     | 1.46               | EPB49         | Erythrocyte membrane protein band 4.9 (dematin)                        | 2039            |
| 0.0045608      | 218902_at       | 1.46               | NOTCH1        | Notch 1                                                                | 4851            |
| 0.0054891      | 203002_at       | 1.46               | AMOTL2        | Angiomotin like 2                                                      | 51421           |
| 0.0074176      | 221653_x_at     | 1.46               | APOL2         | Apolipoprotein L, 2                                                    | 23780           |
| 0.0080365      | 221290_s_at     | 1.46               | MUM1          | Melanoma associated antigen (mutated) 1                                | 84939           |
| 0.0002332      | 220477_s_at     | 1.45               | C20orf30      | Chromosome 20 open reading frame 30                                    | 29058           |
| 0.0011064      | 219001_s_at     | 1.45               | DCAF10        | DDB1 and CUL4 associated factor 10                                     | 79269           |
| 0.0017879      | 213974_at       | 1.45               | ADAMTSL3      | ADAMTS-like 3                                                          | 57188           |
| 0.0028972      | 212197_x_at     | 1.45               | MPRIP         | Myosin phosphatase Rho interacting protein                             | 23164           |
| 0.0035004      | 205911_at       | 1.45               | PTH1R         | Parathyroid hormone 1 receptor                                         | 5745            |
| 0.0055792      | 202944_at       | 1.45               | NAGA          | N-acetylgalactosaminidase, alpha-                                      | 4668            |
| 0.0063166      | 208018_s_at     | 1.45               | HCK           | Hemopoietic cell kinase                                                | 3055            |
| 0.0078595      | 222175_s_at     | 1.44               | MED15         | Mediator complex subunit 15                                            | 51586           |
| 0.0093779      | 202157_s_at     | 1.44               | CELF2         | CUGBP, Elav-like family member 2                                       | 10659           |

| <b>P value</b> | <b>ProbeSet</b> | <b>Fold change</b> | <b>Symbol</b> | <b>Name</b>                                                                            | <b>EntrezID</b> |
|----------------|-----------------|--------------------|---------------|----------------------------------------------------------------------------------------|-----------------|
| 0.0045266      | 206128_at       | 1.43               | ADRA2C        | Adrenergic, alpha-2C-, receptor                                                        | 152             |
| 0.0053103      | 212856_at       | 1.43               | GRAMD4        | GRAM domain containing 4                                                               | 23151           |
| 0.007046       | 49329_at        | 1.43               | KLHL22        | Kelch-like 22 (Drosophila)                                                             | 84861           |
| 0.0023327      | 209370_s_at     | 1.42               | SH3BP2        | SH3-domain binding protein 2                                                           | 6452            |
| 0.0027332      | 33197_at        | 1.42               | MYO7A         | Myosin VIIA                                                                            | 4647            |
| 0.0044819      | 201487_at       | 1.42               | CTSC          | Cathepsin C                                                                            | 1075            |
| 0.0093403      | 215088_s_at     | 1.42               | SDHC          | Succinate dehydrogenase complex, subunit C, integral membrane protein, 15kda           | 6391            |
| 0.0010567      | 203206_at       | 1.41               | FAM53B        | Family with sequence similarity 53, member B                                           | 9679            |
| 0.0026138      | 201114_x_at     | 1.41               | PSMA7         | Proteasome (prosome, macropain) subunit, alpha type, 7                                 | 5688            |
| 0.0087824      | 206016_at       | 1.41               | CCDC22        | Coiled-coil domain containing 22                                                       | 28952           |
| 0.0049265      | 53076_at        | 1.4                | B4GALT7       | Xylosylprotein beta 1,4-galactosyltransferase, polypeptide 7 (galactosyltransferase I) | 11285           |
| 0.0074445      | 218208_at       | 1.39               | PQLC1         | PQ loop repeat containing 1                                                            | 80148           |
| 0.0097643      | 218496_at       | 1.39               | RNASEH1       | Ribonuclease H1                                                                        | 246243          |
| 0.0035564      | 218078_s_at     | 1.38               | ZDHHC3        | Zinc finger, DHHC-type containing 3                                                    | 51304           |
| 0.0047932      | 212437_at       | 1.37               | CENPB         | Centromere protein B, 80kda                                                            | 1059            |
| 0.0052297      | 34406_at        | 1.37               | PACS2         | Phosphofurin acidic cluster sorting protein 2                                          | 23241           |
| 0.0056987      | 204191_at       | 1.37               | IFNAR1        | Interferon (alpha, beta and omega) receptor 1                                          | 3454            |
| 0.0077771      | 219625_s_at     | 1.37               | COL4A3BP      | Collagen, type IV, alpha 3 (Goodpasture antigen) binding protein                       | 10087           |
| 0.0078759      | 204187_at       | 1.37               | GMPR          | Guanosine monophosphate reductase                                                      | 2766            |
| 4.44E-05       | 212103_at       | 1.36               | KPNA6         | Karyopherin alpha 6 (importin alpha 7)                                                 | 23633           |
| 0.006899       | 207992_s_at     | 1.36               | AMPD3         | Adenosine monophosphate deaminase 3                                                    | 272             |
| 0.0056641      | 208728_s_at     | 1.34               | CDC42         | Cell division cycle 42 (GTP binding protein, 25kda)                                    | 998             |
| 0.0065587      | 201314_at       | 1.34               | STK25         | Serine/threonine kinase 25                                                             | 10494           |
| 0.006731       | 213836_s_at     | 1.34               | WIPI1         | WD repeat domain, phosphoinositide interacting 1                                       | 55062           |
| 0.0010158      | 204211_x_at     | 1.33               | EIF2AK2       | Eukaryotic translation initiation factor 2-alpha kinase 2                              | 5610            |
| 0.0017999      | 200882_s_at     | 1.33               | PSMD4         | Proteasome (prosome, macropain) 26S subunit, non-atpase, 4                             | 5710            |
| 0.0036591      | 219180_s_at     | 1.33               | PEX26         | Peroxisomal biogenesis factor 26                                                       | 55670           |
| 0.0056663      | 204488_at       | 1.33               | DOLK          | Dolichol kinase                                                                        | 22845           |
| 0.006963       | 201000_at       | 1.33               | AARS          | Alanyl-trna synthetase                                                                 | 16              |
| 0.0087943      | 204264_at       | 1.32               | CPT2          | Carnitinepalmitoyltransferase 2                                                        | 1376            |
| 0.0059441      | 219366_at       | 1.31               | AVEN          | Apoptosis, caspase activation inhibitor                                                | 57099           |
| 0.0076698      | 203512_at       | 1.31               | TRAPPC3       | Trafficking protein particle complex 3                                                 | 27095           |
| 0.008246       | 205981_s_at     | 1.31               | ING2          | Inhibitor of growth family, member 2                                                   | 3622            |
| 0.0063335      | 207469_s_at     | 1.3                | PIR           | Pirin (iron-binding nuclear protein)                                                   | 8544            |
| 0.0072519      | 222021_x_at     | 1.3                | SDHAP1        | Succinate dehydrogenase complex, subunit A, flavoprotein pseudogene 1                  | 255812          |

| <b>P value</b> | <b>ProbeSet</b> | <b>Fold change</b> | <b>Symbol</b> | <b>Name</b>                                                                                               | <b>EntrezID</b> |
|----------------|-----------------|--------------------|---------------|-----------------------------------------------------------------------------------------------------------|-----------------|
| 0.0092438      | 201157_s_at     | 1.3                | NMT1          | N-myristoyltransferase 1                                                                                  | 4836            |
| 0.00053        | 203776_at       | 1.29               | GPKOW         | G patch domain and KOW motifs                                                                             | 27238           |
| 0.0061597      | 213290_at       | 1.29               | COL6A2        | Collagen, type VI, alpha 2                                                                                | 1292            |
| 0.006307       | 218673_s_at     | 1.29               | ATG7          | ATG7 autophagy related 7 homolog (S. Cerevisiae)                                                          | 10533           |
| 0.0060487      | 219723_x_at     | 1.27               | AGPAT3        | 1-acylglycerol-3-phosphate O-acyltransferase 3                                                            | 56894           |
| 0.0083228      | 205687_at       | 1.27               | UBFD1         | Ubiquitin family domain containing 1                                                                      | 56061           |
| 0.0087457      | 209414_at       | 1.27               | FZR1          | Fizzy/cell division cycle 20 related 1 (Drosophila)                                                       | 51343           |
| 0.0065346      | 219620_x_at     | 1.25               | C9orf167      | Chromosome 9 open reading frame 167                                                                       | 54863           |
| 0.0073004      | 202347_s_at     | 1.25               | UBE2K         | Ubiquitin-conjugating enzyme E2K (UBC1 homolog, yeast)                                                    | 3093            |
| 0.0063658      | 221725_at       | 1.21               | WASF2         | WAS protein family, member 2                                                                              | 10163           |
| 0.008407       | 203270_at       | 1.21               | DTYMK         | Deoxythymidylate kinase (thymidylate kinase)                                                              | 1841            |
| 0.0086163      | 212010_s_at     | 1.19               | CDV3          | CDV3 homolog (mouse)                                                                                      | 55573           |
| 0.0084035      | 221321_s_at     | 1.17               | KCNIP2        | Kv channel interacting protein 2                                                                          | 30819           |
| 0.0077824      | 206806_at       | 0.91               | DGKI          | Diacylglycerol kinase, iota                                                                               | 9162            |
| 0.0079829      | 212547_at       | 0.89               | BRD3          | Bromodomain containing 3                                                                                  | 8019            |
| 0.0017957      | 217982_s_at     | 0.87               | MORF4L1       | Mortality factor 4 like 1                                                                                 | 10933           |
| 0.0027698      | 201994_at       | 0.87               | MORF4L2       | Mortality factor 4 like 2                                                                                 | 9643            |
| 0.0019686      | 212718_at       | 0.86               | PAPOLA        | Poly(A) polymerase alpha                                                                                  | 10914           |
| 0.0059058      | 205788_s_at     | 0.86               | ZC3H11A       | Zinc finger CCCH-type containing 11A                                                                      | 9877            |
| 0.0048675      | 202560_s_at     | 0.85               | C1orf77       | Chromosome 1 open reading frame 77                                                                        | 26097           |
| 0.0053822      | 209688_s_at     | 0.85               | CCDC93        | Coiled-coil domain containing 93                                                                          | 54520           |
| 0.0043372      | 214328_s_at     | 0.84               | HSP90AA1      | Heat shock protein 90kda alpha (cytosolic), class A member 1                                              | 3320            |
| 0.0050789      | 201658_at       | 0.84               | ARL1          | ADP-ribosylation factor-like 1                                                                            | 400             |
| 0.0070005      | 207160_at       | 0.84               | IL12A         | Interleukin 12A (natural killer cell stimulatory factor 1, cytotoxic lymphocyte maturation factor 1, p35) | 3592            |
| 0.0071707      | 212872_s_at     | 0.84               | MED20         | Mediator complex subunit 20                                                                               | 9477            |
| 0.0095495      | 202521_at       | 0.84               | CTCF          | CCCTC-binding factor (zinc finger protein)                                                                | 10664           |
| 0.0005094      | 221476_s_at     | 0.83               | RPL15         | Ribosomal protein L15                                                                                     | 6138            |
| 0.0020706      | 202981_x_at     | 0.83               | SIAH1         | Seven in absentia homolog 1 (Drosophila)                                                                  | 6477            |
| 0.0033618      | 218783_at       | 0.83               | INTS7         | Integrator complex subunit 7                                                                              | 25896           |
| 0.0042875      | 208718_at       | 0.83               | DDX17         | DEAD (Asp-Glu-Ala-Asp) box polypeptide 17                                                                 | 10521           |
| 0.0063748      | 217740_x_at     | 0.83               | RPL7A         | Ribosomal protein l7a                                                                                     | 6130            |
| 0.0081041      | 201987_at       | 0.83               | MED13         | Mediator complex subunit 13                                                                               | 9969            |
| 0.0099203      | 221873_at       | 0.83               | ZNF143        | Zinc finger protein 143                                                                                   | 7702            |
| 0.0009473      | 200043_at       | 0.82               | ERH           | Enhancer of rudimentary homolog (Drosophila)                                                              | 2079            |
| 0.0014848      | 200068_s_at     | 0.82               | CANX          | Calnexin                                                                                                  | 821             |
| 0.0022958      | 200063_s_at     | 0.82               | NPM1          | Nucleophosmin (nucleolarphosphoprotein B23, numatrin)                                                     | 4869            |
| 0.0047971      | 221843_s_at     | 0.82               | KIAA1609      | Kiaa1609                                                                                                  | 57707           |

| <b>P value</b> | <b>ProbeSet</b> | <b>Fold change</b> | <b>Symbol</b> | <b>Name</b>                                                                           | <b>EntrezID</b> |
|----------------|-----------------|--------------------|---------------|---------------------------------------------------------------------------------------|-----------------|
| 0.0069739      | 203026_at       | 0.82               | ZBTB5         | Zinc finger and BTB domain containing 5                                               | 9925            |
| 0.0074039      | 212114_at       | 0.82               | ATXN7L3B      | Ataxin 7-like 3B                                                                      | 552889          |
| 0.0005185      | 200627_at       | 0.81               | PTGES3        | Prostaglandin E synthase 3 (cytosolic)                                                | 10728           |
| 0.0039632      | 210986_s_at     | 0.81               | TPM1          | Tropomyosin 1 (alpha)                                                                 | 7168            |
| 0.0049894      | 214363_s_at     | 0.81               | MATR3         | Matrin 3                                                                              | 9782            |
| 0.005047       | 211784_s_at     | 0.81               | SRSF1         | Serine/arginine-rich splicing factor 1                                                | 6426            |
| 0.0055115      | 203389_at       | 0.81               | KIF3C         | Kinesin family member 3C                                                              | 3797            |
| 0.008027       | 213278_at       | 0.81               | MTMR9         | Myotubularin related protein 9                                                        | 66036           |
| 0.0093542      | 212593_s_at     | 0.81               | PDCD4         | Programmed cell death 4 (neoplastic transformation inhibitor)                         | 27250           |
| 0.0004529      | 204957_at       | 0.8                | ORC5L         | Origin recognition complex, subunit 5-like (yeast)                                    | 5001            |
| 0.0010465      | 209390_at       | 0.8                | TSC1          | Tuberous sclerosis 1                                                                  | 7248            |
| 0.0032423      | 200794_x_at     | 0.8                | DAZAP2        | DAZ associated protein 2                                                              | 9802            |
| 0.0054927      | 208668_x_at     | 0.8                | HMG2          | High-mobility group nucleosomal binding domain 2                                      | 3151            |
| 0.007719       | 200945_s_at     | 0.8                | SEC31A        | SEC31 homolog A ( <i>S. Cerevisiae</i> )                                              | 22872           |
| 0.0089126      | 204587_at       | 0.8                | SLC25A14      | Solute carrier family 25 (mitochondrial carrier, brain), member 14                    | 9016            |
| 0.0092073      | 210409_at       | 0.8                | C6orf124      | Chromosome 6 open reading frame 124                                                   | 653483          |
| 0.0004308      | 200877_at       | 0.79               | CCT4          | Chaperonin containing TCP1, subunit 4 (delta)                                         | 10575           |
| 0.0023786      | 203848_at       | 0.79               | AKAP8         | A kinase (PRKA) anchor protein 8                                                      | 10270           |
| 0.0027798      | 204098_at       | 0.79               | RBMX2         | RNA binding motif protein, X-linked 2                                                 | 51634           |
| 0.0047603      | 218403_at       | 0.79               | TRIAP1        | TP53 regulated inhibitor of apoptosis 1                                               | 51499           |
| 0.0058601      | 200799_at       | 0.79               | HSPA1A        | Heat shock 70kda protein 1A                                                           | 3303            |
| 0.0064789      | 207417_s_at     | 0.79               | ZNF177        | Zinc finger protein 177                                                               | 7730            |
| 0.0066178      | 214035_x_at     | 0.79               | LOC399491     | GPS, PLAT and transmembrane domain-containing protein                                 | 399491          |
| 0.0071964      | 201773_at       | 0.79               | ADNP          | Activity-dependent neuroprotectorhomeobox                                             | 23394           |
| 0.001299       | 213861_s_at     | 0.78               | FAM119B       | Family with sequence similarity 119, member B                                         | 25895           |
| 0.0026189      | 204370_at       | 0.78               | CLP1          | CLP1, cleavage and polyadenylation factor I subunit, homolog ( <i>S. Cerevisiae</i> ) | 10978           |
| 0.0034364      | 209572_s_at     | 0.78               | EED           | Embryonic ectoderm development                                                        | 8726            |
| 0.0053973      | 212066_s_at     | 0.78               | USP34         | Ubiquitin specific peptidase 34                                                       | 9736            |
| 0.0078558      | 218263_s_at     | 0.78               | ZBED5         | Zinc finger, BED-type containing 5                                                    | 58486           |
| 0.0079856      | 217833_at       | 0.78               | SYNCRIP       | Synaptotagmin binding, cytoplasmic RNA interacting protein                            | 10492           |
| 0.0091278      | 213390_at       | 0.78               | ZC3H4         | Zinc finger CCCH-type containing 4                                                    | 23211           |
| 0.0001428      | 203117_s_at     | 0.77               | PAN2          | PAN2 poly(A) specific ribonuclease subunit homolog ( <i>S. Cerevisiae</i> )           | 9924            |
| 0.0012603      | 202184_s_at     | 0.77               | NUP133        | Nucleoporin 133kda                                                                    | 55746           |
| 0.0018253      | 208697_s_at     | 0.77               | EIF3E         | Eukaryotic translation initiation factor 3, subunit E                                 | 3646            |
| 0.0022832      | 214661_s_at     | 0.77               | NOP14         | NOP14 nucleolar protein homolog (yeast)                                               | 8602            |

| <b>P value</b> | <b>ProbeSet</b> | <b>Fold change</b> | <b>Symbol</b> | <b>Name</b>                                             | <b>EntrezID</b> |
|----------------|-----------------|--------------------|---------------|---------------------------------------------------------|-----------------|
| 0.0032245      | 203266_s_at     | 0.77               | MAP2K4        | Mitogen-activated protein kinase kinase 4               | 6416            |
| 0.0036646      | 207153_s_at     | 0.77               | GLMN          | Glomulin, FKBP associated protein                       | 11146           |
| 0.004585       | 209944_at       | 0.77               | ZNF410        | Zinc finger protein 410                                 | 57862           |
| 0.0046919      | 213762_x_at     | 0.77               | RBMX          | RNA binding motif protein, X-linked                     | 27316           |
| 0.0049172      | 212455_at       | 0.77               | YTHDC1        | YTH domain containing 1                                 | 91746           |
| 0.0058852      | 218920_at       | 0.77               | FAM193B       | Family with sequence similarity 193, member B           | 54540           |
| 0.006684       | 203531_at       | 0.77               | CUL5          | Cullin 5                                                | 8065            |
| 0.0095887      | 214123_s_at     | 0.77               | C4orf10       | Chromosome 4 open reading frame 10                      | 317648          |
| 0.0095968      | 208939_at       | 0.77               | SEPHS1        | Selenophosphate synthetase 1                            | 22929           |
| 0.0001638      | 202265_at       | 0.76               | BMI1          | BMI1 polycomb ring finger oncogene                      | 648             |
| 0.0008435      | 213682_at       | 0.76               | NUP50         | Nucleoporin 50kda                                       | 10762           |
| 0.0010042      | 212153_at       | 0.76               | POGZ          | Pogo transposable element with ZNF domain               | 23126           |
| 0.0023176      | 219661_at       | 0.76               | RANBP17       | RAN binding protein 17                                  | 64901           |
| 0.002414       | 218005_at       | 0.76               | ZNF22         | Zinc finger protein 22 (KOX 15)                         | 7570            |
| 0.0043089      | 46323_at        | 0.76               | CANT1         | Calcium activated nucleotidase 1                        | 124583          |
| 0.0043583      | 202842_s_at     | 0.76               | DNAJB9        | Dnaj (Hsp40) homolog, subfamily B, member 9             | 4189            |
| 0.0056807      | 212474_at       | 0.76               | AVL9          | AVL9 homolog (S. Cerevisiae)                            | 23080           |
| 0.0057736      | 36552_at        | 0.76               | C2CD3         | C2 calcium-dependent domain containing 3                | 26005           |
| 0.0067915      | 221954_at       | 0.76               | C20orf111     | Chromosome 20 open reading frame 111                    | 51526           |
| 0.0070195      | 208655_at       | 0.76               | CCNI          | Cyclin I                                                | 10983           |
| 0.0076797      | 203616_at       | 0.76               | POLB          | Polymerase (DNA directed), beta                         | 5423            |
| 7.07E-05       | 200873_s_at     | 0.75               | CCT8          | Chaperonin containing TCP1, subunit 8 (theta)           | 10694           |
| 0.0003121      | 218378_s_at     | 0.75               | PRKRIP1       | PRKR interacting protein 1 (IL11 inducible)             | 79706           |
| 0.0007199      | 213271_s_at     | 0.75               | DOPEY1        | Dopey family member 1                                   | 23033           |
| 0.0008025      | 203229_s_at     | 0.75               | CLK2          | CDC-like kinase 2                                       | 1196            |
| 0.0014334      | 219538_at       | 0.75               | WDR5B         | WD repeat domain 5B                                     | 54554           |
| 0.0016115      | 221751_at       | 0.75               | PANK3         | Pantothenate kinase 3                                   | 79646           |
| 0.0034142      | 212416_at       | 0.75               | SCAMP1        | Secretory carrier membrane protein 1                    | 9522            |
| 0.0049051      | 202076_at       | 0.75               | BIRC2         | Baculoviral IAP repeat-containing 2                     | 329             |
| 0.0052029      | 212838_at       | 0.75               | DNMBP         | Dynamin binding protein                                 | 23268           |
| 0.0063734      | 221952_x_at     | 0.75               | TRMT5         | TRM5 tnamethyltransferase 5 homolog (S. Cerevisiae)     | 57570           |
| 0.0064509      | 212149_at       | 0.75               | EFR3A         | EFR3 homolog A (S. Cerevisiae)                          | 23167           |
| 0.0071622      | 201687_s_at     | 0.75               | API5          | Apoptosis inhibitor 5                                   | 8539            |
| 0.0082084      | 203611_at       | 0.75               | TERF2         | Telomeric repeat binding factor 2                       | 7014            |
| 0.0092241      | 202133_at       | 0.75               | WWTR1         | WW domain containing transcription regulator 1          | 25937           |
| 3.78E-05       | 204618_s_at     | 0.74               | GABPB1        | GA binding protein transcription factor, beta subunit 1 | 2553            |
| 0.0004268      | 218527_at       | 0.74               | APTX          | Aprataxin                                               | 54840           |
| 0.0011597      | 208801_at       | 0.74               | SRP72         | Signal recognition particle 72kda                       | 6731            |



| <b>P value</b> | <b>ProbeSet</b> | <b>Fold change</b> | <b>Symbol</b> | <b>Name</b>                                                       | <b>EntrezID</b> |
|----------------|-----------------|--------------------|---------------|-------------------------------------------------------------------|-----------------|
| 0.0011892      | 207753_at       | 0.74               | ZNF304        | Zinc finger protein 304                                           | 57343           |
| 0.0014559      | 203057_s_at     | 0.74               | PRDM2         | PR domain containing 2, with ZNF domain                           | 7799            |
| 0.0018468      | 213857_s_at     | 0.74               | CD47          | CD47 molecule                                                     | 961             |
| 0.0019029      | 212836_at       | 0.74               | POLD3         | Polymerase (DNA-directed), delta 3, accessory subunit             | 10714           |
| 0.0020524      | 219526_at       | 0.74               | C14orf169     | Chromosome 14 open reading frame 169                              | 79697           |
| 0.0023707      | 201385_at       | 0.74               | DHX15         | DEAH (Asp-Glu-Ala-His) box polypeptide 15                         | 1665            |
| 0.0036206      | 201845_s_at     | 0.74               | RYBP          | RING1 and YY1 binding protein                                     | 23429           |
| 0.004556       | 201997_s_at     | 0.74               | SPEN          | Spn homolog, transcriptional regulator (Drosophila)               | 23013           |
| 0.0050701      | 202370_s_at     | 0.74               | CBFB          | Core-binding factor, beta subunit                                 | 865             |
| 0.0054046      | 201664_at       | 0.74               | SMC4          | Structural maintenance of chromosomes 4                           | 10051           |
| 0.0054306      | 200631_s_at     | 0.74               | SET           | SET nuclear oncogene                                              | 6418            |
| 0.0055347      | 36888_at        | 0.74               | HAUS5         | HAUS augmin-like complex, subunit 5                               | 23354           |
| 0.0073057      | 212505_s_at     | 0.74               | KIAA0892      | Kiaa0892                                                          | 23383           |
| 0.0078845      | 201786_s_at     | 0.74               | ADAR          | Adenosine deaminase, RNA-specific                                 | 103             |
| 0.0001164      | 219362_at       | 0.73               | NAA35         | N(alpha)-acetyltransferase 35, natc auxiliary subunit             | 60560           |
| 0.0008097      | 203080_s_at     | 0.73               | BAZ2B         | Bromodomain adjacent to zinc finger domain, 2B                    | 29994           |
| 0.0015962      | 208804_s_at     | 0.73               | SRSF6         | Serine/arginine-rich splicing factor 6                            | 6431            |
| 0.002242       | 214113_s_at     | 0.73               | RBM8A         | RNA binding motif protein 8A                                      | 9939            |
| 0.0032224      | 208882_s_at     | 0.73               | UBR5          | Ubiquitin protein ligase E3 component n-recogin 5                 | 51366           |
| 0.0033318      | 213410_at       | 0.73               | C10orf137     | Chromosome 10 open reading frame 137                              | 26098           |
| 0.0041216      | 203407_at       | 0.73               | PPL           | Periplakin                                                        | 5493            |
| 0.004629       | 201578_at       | 0.73               | PODXL         | Podocalyxin-like                                                  | 5420            |
| 0.0058368      | 202088_at       | 0.73               | SLC39A6       | Solute carrier family 39 (zinc transporter), member 6             | 25800           |
| 0.0067163      | 209386_at       | 0.73               | TM4SF1        | Transmembrane 4 L six family member 1                             | 4071            |
| 0.007013       | 209362_at       | 0.73               | MED21         | Mediator complex subunit 21                                       | 9412            |
| 0.0080345      | 202658_at       | 0.73               | PEX11B        | Peroxisomal biogenesis factor 11 beta                             | 8799            |
| 0.0081044      | 214662_at       | 0.73               | WDR43         | WD repeat domain 43                                               | 23160           |
| 0.0081974      | 205450_at       | 0.73               | PHKA1         | Phosphorylase kinase, alpha 1 (muscle)                            | 5255            |
| 0.0085986      | 206683_at       | 0.73               | ZNF165        | Zinc finger protein 165                                           | 7718            |
| 0.0091961      | 212919_at       | 0.73               | DCP2          | DCP2 decapping enzyme homolog (S. Cerevisiae)                     | 167227          |
| 0.0011627      | 204071_s_at     | 0.72               | TOPORS        | Topoisomerase I binding, arginine/serine-rich                     | 10210           |
| 0.0028436      | 218979_at       | 0.72               | RMI1          | RMI1, recq mediated genome instability 1, homolog (S. Cerevisiae) | 80010           |
| 0.0037031      | 200937_s_at     | 0.72               | RPL5          | Ribosomal protein L5                                              | 6125            |
| 0.0041947      | 218471_s_at     | 0.72               | BBS1          | Bardet-Biedl syndrome 1                                           | 582             |
| 0.0053025      | 214246_x_at     | 0.72               | MINK1         | Misshapen-like kinase 1                                           | 50488           |
| 0.005954       | 203743_s_at     | 0.72               | TDG           | Thymine-DNA glycosylase                                           | 6996            |
| 0.0078238      | 220399_at       | 0.72               | NCRNA00115    | Non-protein coding RNA 115                                        | 79854           |

| <b>P value</b> | <b>ProbeSet</b> | <b>Fold change</b> | <b>Symbol</b> | <b>Name</b>                                                                                                             | <b>EntrezID</b> |
|----------------|-----------------|--------------------|---------------|-------------------------------------------------------------------------------------------------------------------------|-----------------|
| 0.0079766      | 213743_at       | 0.72               | CCNT2         | Cyclin T2                                                                                                               | 905             |
| 0.0092828      | 209240_at       | 0.72               | OGT           | O-linked N-acetylglucosamine (glcnac) transferase (UDP-N-acetylglucosamine:polypeptide-N-acetylglucosaminyltransferase) | 8473            |
| 4.89E-05       | 212412_at       | 0.71               | PDLIM5        | PDZ and LIM domain 5                                                                                                    | 10611           |
| 0.0002201      | 219351_at       | 0.71               | TRAPPC2       | Trafficking protein particle complex 2                                                                                  | 6399            |
| 0.0004808      | 213233_s_at     | 0.71               | KLHL9         | Kelch-like 9 (Drosophila)                                                                                               | 55958           |
| 0.0008308      | 221230_s_at     | 0.71               | ARID4B        | AT rich interactive domain 4B (RBP1-like)                                                                               | 51742           |
| 0.00156        | 205080_at       | 0.71               | RARB          | Retinoic acid receptor, beta                                                                                            | 5915            |
| 0.0018868      | 206142_at       | 0.71               | ZNF135        | Zinc finger protein 135                                                                                                 | 7694            |
| 0.0027008      | 213136_at       | 0.71               | PTPN2         | Protein tyrosine phosphatase, non-receptor type 2                                                                       | 5771            |
| 0.0028235      | 213452_at       | 0.71               | ZNF184        | Zinc finger protein 184                                                                                                 | 7738            |
| 0.004647       | 209139_s_at     | 0.71               | PRKRA         | Protein kinase, interferon-inducible double stranded RNA dependent activator                                            | 8575            |
| 0.0047406      | 205583_s_at     | 0.71               | ALG13         | Asparagine-linked glycosylation 13 homolog (S. Cerevisiae)                                                              | 79868           |
| 0.0060743      | 218397_at       | 0.71               | FANCL         | Fanconi anemia, complementation group L                                                                                 | 55120           |
| 0.006369       | 213346_at       | 0.71               | C13orf27      | Chromosome 13 open reading frame 27                                                                                     | 93081           |
| 0.0001545      | 200944_s_at     | 0.7                | HMGN1         | High-mobility group nucleosome binding domain 1                                                                         | 3150            |
| 0.0021576      | 204215_at       | 0.7                | C7orf23       | Chromosome 7 open reading frame 23                                                                                      | 79161           |
| 0.0031468      | 218615_s_at     | 0.7                | TMEM39A       | Transmembrane protein 39A                                                                                               | 55254           |
| 0.0040659      | 206507_at       | 0.7                | ZSCAN12       | Zinc finger and SCAN domain containing 12                                                                               | 9753            |
| 0.0041152      | 213694_at       | 0.7                | RSBN1         | Round spermatid basic protein 1                                                                                         | 54665           |
| 0.0056229      | 211033_s_at     | 0.7                | PEX7          | Peroxisomal biogenesis factor 7                                                                                         | 5191            |
| 0.0085486      | 209537_at       | 0.7                | EXTL2         | Exostoses (multiple)-like 2                                                                                             | 2135            |
| 0.009242       | 218040_at       | 0.7                | PRPF38B       | PRP38 pre-mrna processing factor 38 (yeast) domain containing B                                                         | 55119           |
| 9.58E-05       | 214722_at       | 0.69               | NOTCH2NL      | Notch 2 N-terminal like                                                                                                 | 388677          |
| 0.0002564      | 205588_s_at     | 0.69               | FGFR1OP       | FGFR1 oncogene partner                                                                                                  | 11116           |
| 0.0003502      | 219531_at       | 0.69               | CEP72         | Centrosomal protein 72kda                                                                                               | 55722           |
| 0.0026977      | 205047_s_at     | 0.69               | ASNS          | Asparagine synthetase (glutamine-hydrolyzing)                                                                           | 440             |
| 0.0038102      | 205791_x_at     | 0.69               | ZNF230        | Zinc finger protein 230                                                                                                 | 7773            |
| 0.0045804      | 218791_s_at     | 0.69               | C15orf29      | Chromosome 15 open reading frame 29                                                                                     | 79768           |
| 0.0052578      | 208398_s_at     | 0.69               | TBPL1         | TBP-like 1                                                                                                              | 9519            |
| 0.0063406      | 203556_at       | 0.69               | ZHX2          | Zinc fingers and homeoboxes 2                                                                                           | 22882           |
| 0.007452       | 219069_at       | 0.69               | ANKRD49       | Ankyrin repeat domain 49                                                                                                | 54851           |
| 0.0074909      | 218935_at       | 0.69               | EHD3          | EH-domain containing 3                                                                                                  | 30845           |
| 5.00E-05       | 218249_at       | 0.68               | ZDHHC6        | Zinc finger, DHHC-type containing 6                                                                                     | 64429           |
| 0.0008213      | 204354_at       | 0.68               | POT1          | Protection of telomeres 1 homolog (S. Pombe)                                                                            | 25913           |
| 0.0013029      | 211600_at       | 0.68               | PTPRO         | Protein tyrosine phosphatase, receptor type, O                                                                          | 5800            |
| 0.0015095      | 209265_s_at     | 0.68               | METTL3        | Methyltransferase like 3                                                                                                | 56339           |

| <b>P value</b> | <b>ProbeSet</b> | <b>Fold change</b> | <b>Symbol</b> | <b>Name</b>                                                                         | <b>EntrezID</b> |
|----------------|-----------------|--------------------|---------------|-------------------------------------------------------------------------------------|-----------------|
| 0.0015849      | 201084_s_at     | 0.68               | BCLAF1        | BCL2-associated transcription factor 1                                              | 9774            |
| 0.0024444      | 213310_at       | 0.68               | EIF2C2        | Eukaryotic translation initiation factor 2C, 2                                      | 27161           |
| 0.002954       | 209022_at       | 0.68               | STAG2         | Stromal antigen 2                                                                   | 10735           |
| 0.0033293      | 201302_at       | 0.68               | ANXA4         | Annexin A4                                                                          | 307             |
| 0.004163       | 220324_at       | 0.68               | C6orf155      | Chromosome 6 open reading frame 155                                                 | 79940           |
| 0.0049526      | 201746_at       | 0.68               | TP53          | Tumor protein p53                                                                   | 7157            |
| 3.55E-05       | 213392_at       | 0.67               | IQCK          | IQ motif containing K                                                               | 124152          |
| 0.0001383      | 204847_at       | 0.67               | ZBTB11        | Zinc finger and BTB domain containing 11                                            | 27107           |
| 0.0003574      | 202832_at       | 0.67               | GCC2          | GRIP and coiled-coil domain containing 2                                            | 9648            |
| 0.000653       | 215596_s_at     | 0.67               | RNF160        | Ring finger protein 160                                                             | 26046           |
| 0.001181       | 212893_at       | 0.67               | ZZZ3          | Zinc finger, ZZ-type containing 3                                                   | 26009           |
| 0.003117       | 213750_at       | 0.67               | RSL1D1        | Ribosomal L1 domain containing 1                                                    | 26156           |
| 0.0043252      | 213122_at       | 0.67               | TSPYL5        | TSPY-like 5                                                                         | 85453           |
| 0.005083       | 212798_s_at     | 0.67               | ANKMY2        | Ankyrin repeat and MYND domain containing 2                                         | 57037           |
| 0.0051181      | 203721_s_at     | 0.67               | UTP18         | UTP18, small subunit (SSU) processome component, homolog (yeast)                    | 51096           |
| 8.22E-05       | 202220_at       | 0.66               | KIAA0907      | Kiaa0907                                                                            | 22889           |
| 0.0011107      | 204808_s_at     | 0.66               | TMEM5         | Transmembrane protein 5                                                             | 10329           |
| 0.0014713      | 203786_s_at     | 0.66               | TPD52L1       | Tumor protein D52-like 1                                                            | 7164            |
| 0.001687       | 219913_s_at     | 0.66               | CRNKL1        | Crooked neck pre-mrna splicing factor-like 1 (Drosophila)                           | 51340           |
| 0.0036368      | 209031_at       | 0.66               | CADM1         | Cell adhesion molecule 1                                                            | 23705           |
| 0.0043569      | 205198_s_at     | 0.66               | ATP7A         | Atpase, Cu <sup>++</sup> transporting, alpha polypeptide                            | 538             |
| 0.0048097      | 203124_s_at     | 0.66               | SLC11A2       | Solute carrier family 11 (proton-coupled divalent metal ion transporters), member 2 | 4891            |
| 0.0059936      | 204019_s_at     | 0.66               | SH3YL1        | SH3 domain containing, Ysc84-like 1 (S. Cerevisiae)                                 | 26751           |
| 0.0060108      | 200017_at       | 0.66               | RPS27A        | Ribosomal protein s27a                                                              | 6233            |
| 0.008052       | 208778_s_at     | 0.66               | TCP1          | T-complex 1                                                                         | 6950            |
| 0.0089502      | 212907_at       | 0.66               | SLC30A1       | Solute carrier family 30 (zinc transporter), member 1                               | 7779            |
| 0.000289       | 207956_x_at     | 0.65               | PDS5B         | PDS5, regulator of cohesion maintenance, homolog B (S. Cerevisiae)                  | 23047           |
| 0.0003024      | 218851_s_at     | 0.65               | WDR33         | WD repeat domain 33                                                                 | 55339           |
| 0.000376       | 209094_at       | 0.65               | DDAH1         | Dimethylargininedimethylaminohydrolase 1                                            | 23576           |
| 0.0007273      | 210346_s_at     | 0.65               | CLK4          | CDC-like kinase 4                                                                   | 57396           |
| 0.0013431      | 220350_at       | 0.65               | ZNF235        | Zinc finger protein 235                                                             | 9310            |
| 0.0014917      | 214820_at       | 0.65               | BRWD1         | Bromodomain and WD repeat domain containing 1                                       | 54014           |
| 0.0019509      | 201341_at       | 0.65               | ENC1          | Ectodermal-neural cortex 1 (with BTB-like domain)                                   | 8507            |
| 0.0020799      | 212810_s_at     | 0.65               | SLC1A4        | Solute carrier family 1 (glutamate/neutral amino acid transporter), member 4        | 6509            |
| 0.0024129      | 201022_s_at     | 0.65               | DSTN          | Destrin (actin depolymerizing factor)                                               | 11034           |

| <b>P value</b> | <b>ProbeSet</b> | <b>Fold change</b> | <b>Symbol</b> | <b>Name</b>                                                                      | <b>EntrezID</b> |
|----------------|-----------------|--------------------|---------------|----------------------------------------------------------------------------------|-----------------|
| 5.81E-05       | 212204_at       | 0.64               | TMEM87A       | Transmembrane protein 87A                                                        | 25963           |
| 0.0002063      | 205928_at       | 0.64               | ZNF443        | Zinc finger protein 443                                                          | 10224           |
| 0.0002926      | 208796_s_at     | 0.64               | CCNG1         | Cyclin G1                                                                        | 900             |
| 0.0003559      | 202413_s_at     | 0.64               | USP1          | Ubiquitin specific peptidase 1                                                   | 7398            |
| 0.0017344      | 213423_x_at     | 0.64               | TUSC3         | Tumor suppressor candidate 3                                                     | 7991            |
| 0.0018653      | 202193_at       | 0.64               | LIMK2         | LIM domain kinase 2                                                              | 3985            |
| 0.00203        | 202023_at       | 0.64               | EFNA1         | Ephrin-A1                                                                        | 1942            |
| 0.0022985      | 209705_at       | 0.64               | MTF2          | Metal response element binding transcription factor 2                            | 22823           |
| 0.0096493      | 220770_s_at     | 0.64               | C5orf54       | Chromosome 5 open reading frame 54                                               | 63920           |
| 0.000354       | 214948_s_at     | 0.63               | TMF1          | TATA element modulatory factor 1                                                 | 7110            |
| 0.0007231      | 218853_s_at     | 0.63               | MOSPD1        | Motile sperm domain containing 1                                                 | 56180           |
| 0.0009162      | 218846_at       | 0.63               | MED23         | Mediator complex subunit 23                                                      | 9439            |
| 0.0011706      | 219130_at       | 0.63               | CCDC76        | Coiled-coil domain containing 76                                                 | 54482           |
| 0.002169       | 204199_at       | 0.63               | RALGPS1       | Ral GEF with PH domain and SH3 binding motif 1                                   | 9649            |
| 0.0025367      | 209647_s_at     | 0.63               | SOCS5         | Suppressor of cytokine signaling 5                                               | 9655            |
| 0.0059208      | 202221_s_at     | 0.63               | EP300         | E1A binding protein p300                                                         | 2033            |
| 0.0073448      | 219855_at       | 0.63               | NUDT11        | Nudix (nucleoside diphosphate linked moiety X)-type motif 11                     | 55190           |
| 0.0078162      | 208798_x_at     | 0.63               | GOLGA8A       | Golgin A8 family, member A                                                       | 23015           |
| 9.11E-05       | 214281_s_at     | 0.62               | RCHY1         | Ring finger and CHY zinc finger domain containing 1                              | 25898           |
| 0.0007723      | 206976_s_at     | 0.62               | HSPH1         | Heat shock 105kda/110kda protein 1                                               | 10808           |
| 0.0008214      | 218972_at       | 0.62               | TTC17         | Tetratricopeptide repeat domain 17                                               | 55761           |
| 0.0023095      | 201660_at       | 0.62               | ACSL3         | Acyl-coa synthetase long-chain family member 3                                   | 2181            |
| 0.0007369      | 219515_at       | 0.61               | PRDM10        | PR domain containing 10                                                          | 56980           |
| 0.0008089      | 201599_at       | 0.61               | OAT           | Ornithine aminotransferase                                                       | 4942            |
| 0.0013646      | 209300_s_at     | 0.61               | NECAP1        | NECAP endocytosis associated 1                                                   | 25977           |
| 0.0022228      | 209434_s_at     | 0.61               | PPAT          | Phosphoribosyl pyrophosphate amidotransferase                                    | 5471            |
| 0.0031721      | 203216_s_at     | 0.61               | MYO6          | Myosin VI                                                                        | 4646            |
| 0.0042843      | 210108_at       | 0.61               | CACNA1D       | Calcium channel, voltage-dependent, L type, alpha 1D subunit                     | 776             |
| 0.0044061      | 209498_at       | 0.61               | CEACAM1       | Carcinoembryonic antigen-related cell adhesion molecule 1 (biliary glycoprotein) | 634             |
| 0.0048532      | 208886_at       | 0.61               | H1F0          | H1 histone family, member 0                                                      | 3005            |
| 0.0074809      | 214745_at       | 0.61               | PLCH1         | Phospholipase C, eta 1                                                           | 23007           |
| 0.0083588      | 203892_at       | 0.61               | WFDC2         | WAP four-disulfide core domain 2                                                 | 10406           |
| 0.0002486      | 209007_s_at     | 0.6                | C1orf63       | Chromosome 1 open reading frame 63                                               | 57035           |
| 0.0013915      | 213248_at       | 0.6                | LOC730101     | Hypothetical LOC730101                                                           | 730101          |
| 0.0006608      | 219635_at       | 0.59               | ZNF606        | Zinc finger protein 606                                                          | 80095           |
| 0.0007157      | 203038_at       | 0.59               | PTPRK         | Protein tyrosine phosphatase, receptor type, K                                   | 5796            |

| <b>P value</b> | <b>ProbeSet</b> | <b>Fold change</b> | <b>Symbol</b> | <b>Name</b>                                                                | <b>EntrezID</b> |
|----------------|-----------------|--------------------|---------------|----------------------------------------------------------------------------|-----------------|
| 0.0017962      | 202704_at       | 0.59               | TOB1          | Transducer of ERBB2, 1                                                     | 10140           |
| 0.0051529      | 217800_s_at     | 0.59               | NDFIP1        | Nedd4 family interacting protein 1                                         | 80762           |
| 0.0065658      | 201005_at       | 0.59               | CD9           | CD9 molecule                                                               | 928             |
| 0.0082324      | 209791_at       | 0.59               | PADI2         | Peptidyl arginine deiminase, type II                                       | 11240           |
| 8.74E-05       | 204523_at       | 0.58               | ZNF140        | Zinc finger protein 140                                                    | 7699            |
| 0.0034209      | 204170_s_at     | 0.58               | CKS2          | CDC28 protein kinase regulatory subunit 2                                  | 1164            |
| 0.0039947      | 219048_at       | 0.58               | PIGN          | Phosphatidylinositol glycan anchor biosynthesis, class N                   | 23556           |
| 2.23E-05       | 212673_at       | 0.57               | METAP1        | Methionylaminopeptidase 1                                                  | 23173           |
| 0.0017318      | 219474_at       | 0.57               | C3orf52       | Chromosome 3 open reading frame 52                                         | 79669           |
| 0.0018376      | 201939_at       | 0.57               | PLK2          | Polo-like kinase 2                                                         | 10769           |
| 0.0032167      | 218706_s_at     | 0.57               | GRAMD3        | GRAM domain containing 3                                                   | 65983           |
| 0.0060211      | 213900_at       | 0.57               | FAM189A2      | Family with sequence similarity 189, member A2                             | 9413            |
| 0.0062215      | 210425_x_at     | 0.57               | GOLGA8B       | Golgin A8 family, member B                                                 | 440270          |
| 0.0066925      | 205739_x_at     | 0.57               | ZNF107        | Zinc finger protein 107                                                    | 51427           |
| 0.0030753      | 220147_s_at     | 0.56               | FAM60A        | Family with sequence similarity 60, member A                               | 58516           |
| 0.0076385      | 209343_at       | 0.56               | EFHD1         | EF-hand domain family, member D1                                           | 80303           |
| 0.0011546      | 213222_at       | 0.55               | PLCB1         | Phospholipase C, beta 1 (phosphoinositide-specific)                        | 23236           |
| 0.0027957      | 203726_s_at     | 0.55               | LAMA3         | Laminin, alpha 3                                                           | 3909            |
| 0.0033931      | 210074_at       | 0.55               | CTSL2         | Cathepsin L2                                                               | 1515            |
| 0.0078769      | 213992_at       | 0.55               | COL4A6        | Collagen, type IV, alpha 6                                                 | 1288            |
| 6.88E-05       | 219123_at       | 0.54               | ZNF232        | Zinc finger protein 232                                                    | 7775            |
| 0.005546       | 213285_at       | 0.54               | TMEM30B       | Transmembrane protein 30B                                                  | 161291          |
| 0.0004147      | 212828_at       | 0.53               | SYNJ2         | Synaptojanin 2                                                             | 8871            |
| 0.0063711      | 203304_at       | 0.53               | BAMBI         | BMP and activin membrane-bound inhibitor homolog (Xenopus laevis)          | 25805           |
| 0.003468       | 205780_at       | 0.52               | BIK           | BCL2-interacting killer (apoptosis-inducing)                               | 638             |
| 0.000181       | 213107_at       | 0.51               | TNIK          | TRAF2 and NCK interacting kinase                                           | 23043           |
| 0.0014359      | 218888_s_at     | 0.51               | NETO2         | Neuropilin (NRP) and tolloid (TLL)-like 2                                  | 81831           |
| 0.0031682      | 219115_s_at     | 0.51               | IL20RA        | Interleukin 20 receptor, alpha                                             | 53832           |
| 0.0076107      | 212281_s_at     | 0.51               | TMEM97        | Transmembrane protein 97                                                   | 27346           |
| 6.57E-05       | 221207_s_at     | 0.5                | NBEA          | Neurobeachin                                                               | 26960           |
| 0.000962       | 205347_s_at     | 0.5                | TMSB15A       | Thymosin beta 15a                                                          | 11013           |
| 0.0022335      | 209905_at       | 0.5                | HOXA9         | Homeobox A9                                                                | 3205            |
| 0.0019723      | 211423_s_at     | 0.49               | SC5DL         | Sterol-C5-desaturase (ERG3 delta-5-desaturase homolog, S. Cerevisiae)-like | 6309            |
| 4.63E-05       | 205352_at       | 0.48               | SERPINI1      | Serpin peptidase inhibitor, clade I (neuroserpin), member 1                | 5274            |
| 0.0011784      | 203019_x_at     | 0.48               | SSX2IP        | Synovial sarcoma, X breakpoint 2 interacting protein                       | 117178          |
| 0.0057378      | 209842_at       | 0.48               | SOX10         | SRY (sex determining region Y)-box 10                                      | 6663            |
| 0.0061029      | 218824_at       | 0.48               | PNMAL1        | PNMA-like 1                                                                | 55228           |

| <b>P value</b>   | <b>ProbeSet</b>    | <b>Fold change</b> | <b>Symbol</b>   | <b>Name</b>                                                                                          | <b>EntrezID</b> |
|------------------|--------------------|--------------------|-----------------|------------------------------------------------------------------------------------------------------|-----------------|
| 0.0039497        | 219388_at          | 0.46               | GRHL2           | Grainyhead-like 2 (Drosophila)                                                                       | 79977           |
| 0.0049876        | 202421_at          | 0.46               | IGSF3           | Immunoglobulin superfamily, member 3                                                                 | 3321            |
| 0.0088742        | 204304_s_at        | 0.46               | PROM1           | Prominin 1                                                                                           | 8842            |
| 0.0036764        | 201952_at          | 0.45               | ALCAM           | Activated leukocyte cell adhesion molecule                                                           | 214             |
| 0.0014319        | 218330_s_at        | 0.44               | NAV2            | Neuron navigator 2                                                                                   | 89797           |
| 0.0062671        | 201510_at          | 0.44               | ELF3            | E74-like factor 3 (ets domain transcription factor, epithelial-specific )                            | 1999            |
| 0.0036444        | 208165_s_at        | 0.43               | PRSS16          | Protease, serine, 16 (thymus)                                                                        | 10279           |
| 0.001003         | 203638_s_at        | 0.42               | FGFR2           | Fibroblast growth factor receptor 2                                                                  | 2263            |
| 0.0006028        | 206104_at          | 0.4                | ISL1            | ISL LIM homeobox 1                                                                                   | 3670            |
| 0.0008903        | 203961_at          | 0.4                | NEBL            | Nebulette                                                                                            | 10529           |
| 0.003733         | 219476_at          | 0.4                | C1orf116        | Chromosome 1 open reading frame 116                                                                  | 79098           |
| 0.0059133        | 204675_at          | 0.39               | SRD5A1          | Steroid-5-alpha-reductase, alpha polypeptide 1 (3-oxo-5 alpha-steroid delta 4-dehydrogenase alpha 1) | 6715            |
| 0.0053829        | 202936_s_at        | 0.38               | SOX9            | SRY (sex determining region Y)-box 9                                                                 | 6662            |
| 0.0088267        | 203397_s_at        | 0.37               | GALNT3          | UDP-N-acetyl-alpha-D-galactosamine:polypeptide N-acetylgalactosaminyltransferase 3 (galnac-T3)       | 2591            |
| 0.0039678        | 213695_at          | 0.35               | PON3            | Paraoxonase 3                                                                                        | 5446            |
| 0.0087213        | 221215_s_at        | 0.34               | RIPK4           | Receptor-interacting serine-threonine kinase 4                                                       | 54101           |
| <b>0.0082786</b> | <b>205030_at</b>   | <b>0.32</b>        | <b>FABP7</b>    | <b>Fatty acid binding protein 7, brain</b>                                                           | <b>2173</b>     |
| <b>0.0085717</b> | <b>220625_s_at</b> | <b>0.29</b>        | <b>ELF5</b>     | <b>E74-like factor 5 (ets domain transcription factor)</b>                                           | <b>2001</b>     |
| <b>0.0056993</b> | <b>214087_s_at</b> | <b>0.28</b>        | <b>MYBPC1</b>   | <b>Myosin binding protein C, slow type</b>                                                           | <b>4604</b>     |
| <b>0.000214</b>  | <b>204259_at</b>   | <b>0.26</b>        | <b>MMP7</b>     | <b>Matrix metalloproteinase 7 (matrilysin, uterine)</b>                                              | <b>4316</b>     |
| <b>0.0098447</b> | <b>214598_at</b>   | <b>0.26</b>        | <b>CLDN8</b>    | <b>Claudin 8</b>                                                                                     | <b>9073</b>     |
| <b>0.0002724</b> | <b>209480_at</b>   | <b>0.13</b>        | <b>HLA-DQB1</b> | <b>Major histocompatibility complex, class II, DQ beta 1</b>                                         | <b>3119</b>     |
| 0.0003475        | 213831_at          | 0.12               | HLA-DQA1        | Major histocompatibility complex, class II, DQ alpha 1                                               | 3117            |
